# Supplementary material for: Synthesis and Reactivity of Martin’s Spirosilane-Derived Chloromethylsilicate
Source: MDPI journal article supplement (doi:10.3390/molecules27061767), 2022-03-08
Supplement: s1 [file s1]

# Supporting Information

## **Synthesis and Reactivity of Martin's Spirosilane-Derived Chloromethylsilicate**

Thomas Deis <sup>1</sup>, Jérémy Forte <sup>1</sup>, Louis Fensterbank <sup>1,\*</sup> and Gilles Lemièrre <sup>1,\*</sup>

<sup>1</sup> Sorbonne Université, CNRS, Institut Parisien de Chimie Moléculaire, IPCM, 4 place Jussieu, F-75005 Paris, France

\* Correspondence: louis.fensterbank@sorbonne-universite.fr,  
gilles.lemiere@sorbonne-universite.fr

|                                                                                                                                                                                         |           |
|-----------------------------------------------------------------------------------------------------------------------------------------------------------------------------------------|-----------|
| <b>I. Synthesis of organolithium reagents</b>                                                                                                                                           | <b>3</b>  |
| Synthesis of benzyllithium:                                                                                                                                                             | 3         |
| Synthesis of cyclopropyllithium:                                                                                                                                                        | 3         |
| Synthesis of 2-thienyllithium:                                                                                                                                                          | 3         |
| <b>II. NMR monitoring following the method B</b>                                                                                                                                        | <b>4</b>  |
| Synthesis of hydroxysilicate 7:                                                                                                                                                         | 4         |
| Isolation and Stability's assessment of the zwitterionic silicate byproduct 8 upon heating                                                                                              | 6         |
| <b>III. NMR Spectra</b>                                                                                                                                                                 | <b>7</b>  |
| $^1\text{H}$ , $^{13}\text{C}$ , $^{19}\text{F}$ , and $^1\text{H}/^{29}\text{Si}$ HMQC NMR spectra of 2 in $(\text{CD}_3)_2\text{CO}$                                                  | 7         |
| $^1\text{H}$ , $^{13}\text{C}$ , $^{19}\text{F}$ , and $^1\text{H}/^{29}\text{Si}$ HMQC NMR spectra of 3b in $(\text{CD}_3)_2\text{CO}$                                                 | 9         |
| $^1\text{H}$ , $^{13}\text{C}$ , $^{19}\text{F}$ , and $^1\text{H}/^{29}\text{Si}$ HMQC NMR spectra of 3c in $(\text{CD}_3)_2\text{CO}$                                                 | 12        |
| $^1\text{H}$ , $^{13}\text{C}$ , $^{19}\text{F}$ , and $^1\text{H}/^{29}\text{Si}$ HMQC NMR spectra of mixture 3d/4d in $(\text{CD}_3)_2\text{CO}$                                      | 14        |
| $^1\text{H}$ , $^{13}\text{C}$ , $^{19}\text{F}$ , and $^1\text{H}/^{29}\text{Si}$ HMQC NMR spectra of mixture 3e/4e in $(\text{CD}_3)_2\text{CO}$ and 4e in $(\text{CD}_3)_2\text{CO}$ | 17        |
| $^1\text{H}$ , $^{13}\text{C}$ , $^{19}\text{F}$ , and $^1\text{H}/^{29}\text{Si}$ HMQC NMR spectra of 3f in $(\text{CD}_3)_2\text{CO}$                                                 | 21        |
| $^1\text{H}$ , $^{13}\text{C}$ , $^{19}\text{F}$ , and $^1\text{H}/^{29}\text{Si}$ HMQC NMR spectra of 3g in $(\text{CD}_3)_2\text{CO}$                                                 | 23        |
| $^1\text{H}$ , $^{13}\text{C}$ , $^{19}\text{F}$ , and $^1\text{H}/^{29}\text{Si}$ HMQC NMR spectra of 5 in $\text{CDCl}_3$                                                             | 26        |
| $^1\text{H}$ , $^{13}\text{C}$ , $^{19}\text{F}$ , and $^1\text{H}/^{29}\text{Si}$ HMQC NMR spectra of 7 in $\text{CD}_3\text{CN}$                                                      | 29        |
| $^1\text{H}$ , $^{13}\text{C}$ , $^{19}\text{F}$ , and $^1\text{H}/^{29}\text{Si}$ HMQC NMR spectra of 7- $\text{Et}_4\text{N}^+$ in $(\text{CD}_3)_2\text{CO}$                         | 32        |
| $^1\text{H}$ , $^{13}\text{C}$ , $^{19}\text{F}$ , NMR spectra of 8 in $\text{CDCl}_3$ and $^1\text{H}/^{29}\text{Si}$ HMQC spectrum of 8 in $\text{CD}_3\text{CN}$                     | 34        |
| <b>IV. Computational details</b>                                                                                                                                                        | <b>37</b> |
| <b>V. Experimental references</b>                                                                                                                                                       | <b>49</b> |

## I. Synthesis of organolithium reagents

### Synthesis of benzyllithium:

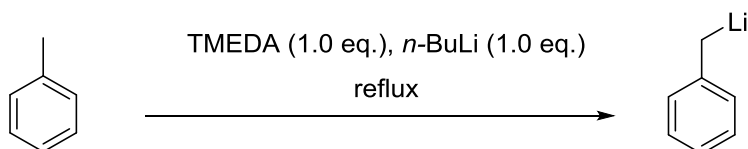

In a dry Schlenk flask was added TMEDA (45  $\mu$ L, 0.30 mmol, 1.0 eq.) and toluene (0.24 mL, 0.30 mmol, 1.0 eq.). *n*-BuLi 2.5M in hexane (0.12 mL, 0.30 mmol, 1.0 eq.) was added dropwise at room temperature, and the reaction was refluxed for 1h. The resulting deep orange mixture was allowed to reach room temperature and was used immediately for the synthesis of phenylethylsilicate **3c**.

### Synthesis of cyclopropyllithium:

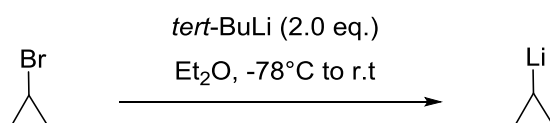

In a dry Schlenk flask was added cyclopropyl bromide (16  $\mu$ L, 0.20 mmol, 1.0 eq.) and Et<sub>2</sub>O (0.5 mL). The resulting solution was cooled down to -78°C and *tert*-BuLi 1.7 M in pentane (0.24 mL, 0.40 mmol, 2.0 eq.) was added dropwise and the reaction mixture was stirred at -78°C for 1h. The solution of cyclopropyllithium was used immediately for the synthesis of the mixture of cyclopropylmethylsilicate **3e** and cyclopropyllithium.

### Synthesis of 2-thienyllithium:

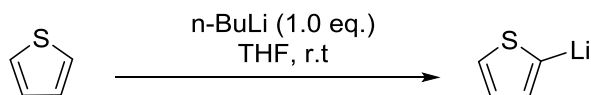

In a dry Schlenk flask was diluted thiophene (25  $\mu$ L, 0.31 mmol, 1.0 eq.) in THF (0.5 mL), and *n*-BuLi 2.5 M in hexane (0.12 mL, 0.30 mmol, 1.0 eq.) was added dropwise at room temperature. The reaction mixture was stirred for 1h at room temperature. until the solution turns yellow. was used immediately for the synthesis of thienylmethylsilicate **3g**

## II. NMR monitoring following the method B

Synthesis of hydroxysilicate **7**:

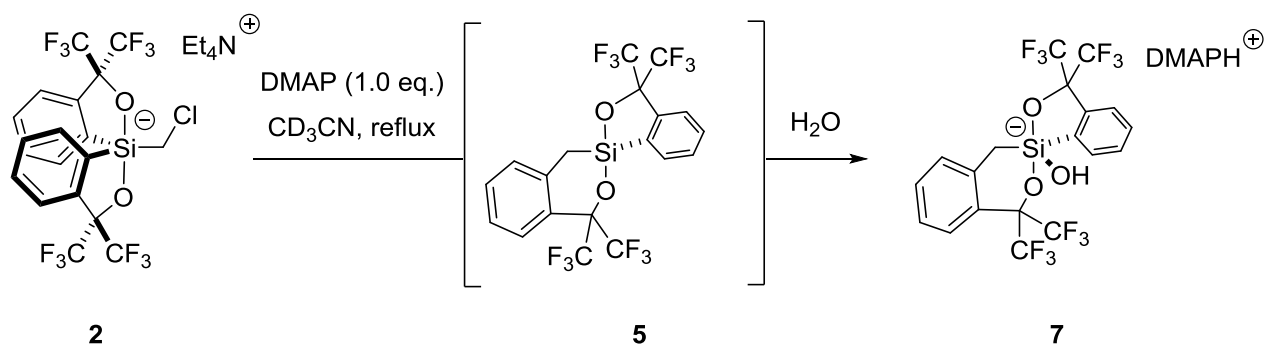

Synthesis of hydroxysilicate **7** according to the method B was NMR-monitored by means of a J. Young's tube starting from chloromethylsilicate **2** (20 mg, 0.029 mmol, 1.0 eq.) and DMAP (3.5 mg, 0.029 mmol, 1.0 eq.) in anhydrous acetonitrile- $\text{d}_3$  (0.4 mL). The reaction was heated at  $80^\circ\text{C}$  overnight, and then water was added to afford silicate **7**.

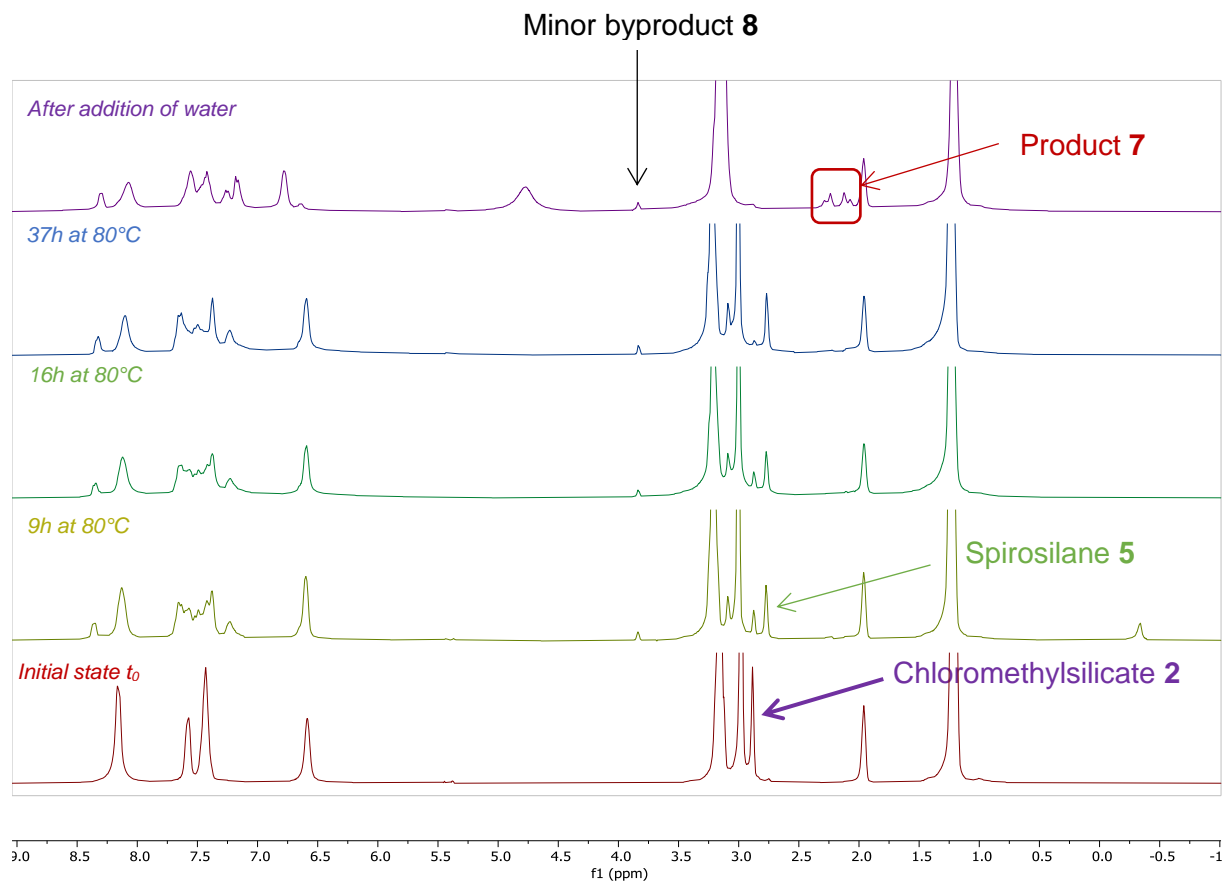

Figure S1 |  $^1\text{H}$  NMR monitoring in  $\text{CD}_3\text{CN}$  for the reaction of chloromethylsilicate **2** with DMAP as Lewis base (method B).

Formation of spirosilane **5** results in appearance of a singlet (2.76 ppm) in  $\text{CD}_3\text{CN}$  associated to the benzylic protons. Air bubbling into the mixture affords hydroxysilicate **7**, which is highlighted by the AB system at 2.20 & 2.10 ppm. The singlet observed at 3.82 ppm indicated the presence of a minor byproduct, which was identified as the silicate **8** as a consequence of the direct substitution of chlorine atom of **2** by DMAP.

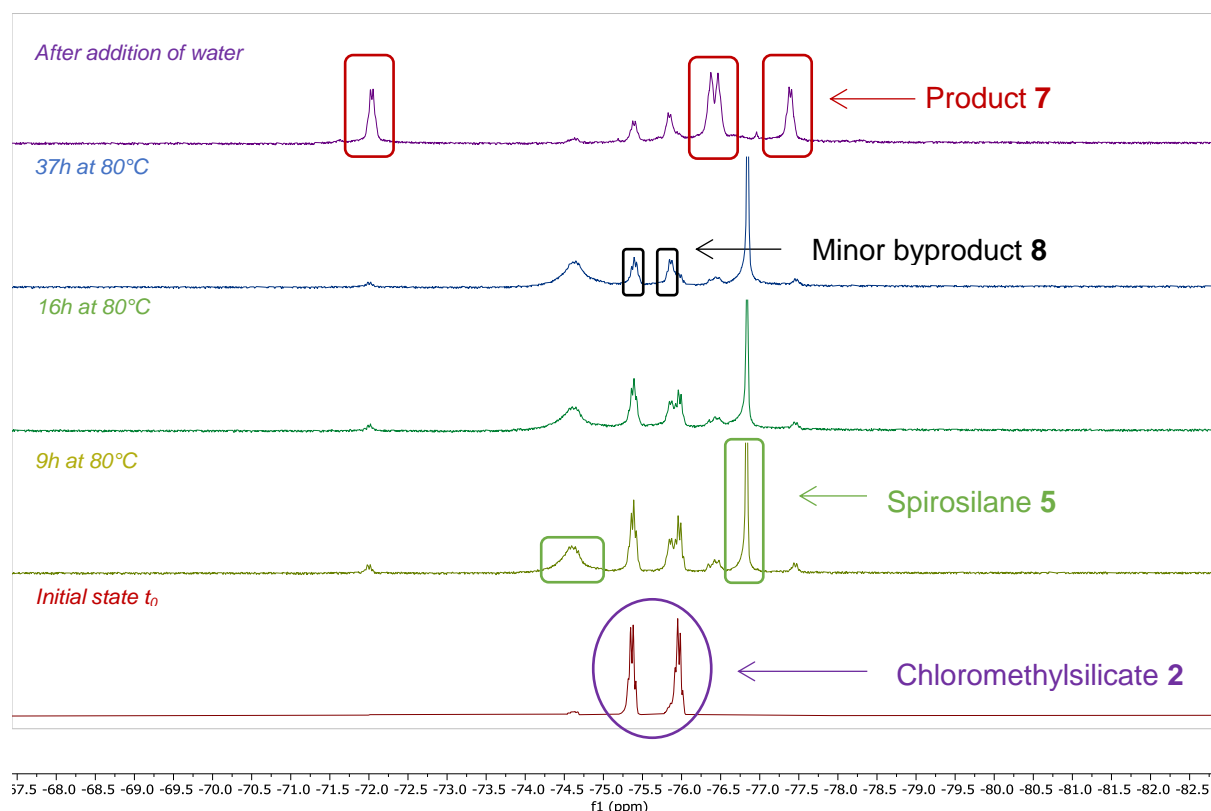

Figure S2 |  $^{19}\text{F}$  NMR monitoring in  $\text{CD}_3\text{CN}$  for the reaction of chloromethylsilicate **2** with DMAP as Lewis base (method B).

Due to the loss of symmetry caused by the ring expansion, the transformation of chloromethylsilicate **2** (purple ellipse) to spirosilane **5** (green box) could be monitored by  $^{19}\text{F}$  NMR with the apparition of the 1 broad signal at -74.6 and the singlet at -76.9 ppm. Air bubbling into the mixture triggers the transformation of **5** to hydroxysilicate **7** (red box), as highlighted by the appearance of the four quadruplets (-72.1, -76.4, -76.5, -77.4 ppm).

# Isolation and Stability's assessment of the zwitterionic silicate byproduct **8** upon heating

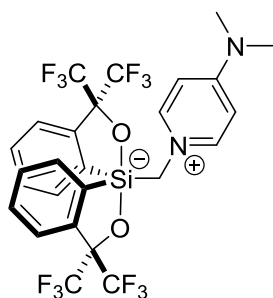

**8**

Zwitterionic nature of byproduct **8** allowed its isolation by chromatography over SiO<sub>2</sub> (DCM 100%) as a colorless solid (1.9 mg, 9%).

**<sup>1</sup>H NMR:** (400 MHz, CDCl<sub>3</sub>) δ 8.11 (d, *J* = 6.9 Hz, 2H), 7.62 (m, 4H), 6.51 (d, *J* = 7.3 Hz, 2H), 3.98 (d, *J* = 14.8 Hz, 1H), 3.88 (d, *J* = 14.8 Hz, 1H), 3.19 (s, 6H). **<sup>13</sup>C NMR:** (101 MHz, CDCl<sub>3</sub>) δ 155.1, 143.3, 141.0, 140.4, 137.5, 129.4, 128.9, 123.8, 106.3, 56.4, 39.9, 29.7, 1.1. **<sup>19</sup>F NMR:** (376 MHz, CDCl<sub>3</sub>) δ -74.77 (q, *J* = 9.2 Hz), -75.33 (q, *J* = 9.4 Hz). **<sup>1</sup>H/<sup>29</sup>Si HMQC:** (400 MHz/79 MHz, CD<sub>3</sub>CN) 3.85/-74.7. **HRMS (ESI<sup>+</sup>):** *m/z* calcd for C<sub>26</sub>H<sub>20</sub>F<sub>12</sub>N<sub>2</sub>O<sub>2</sub>SiH [M+H] 649.1175, found 649.1171.

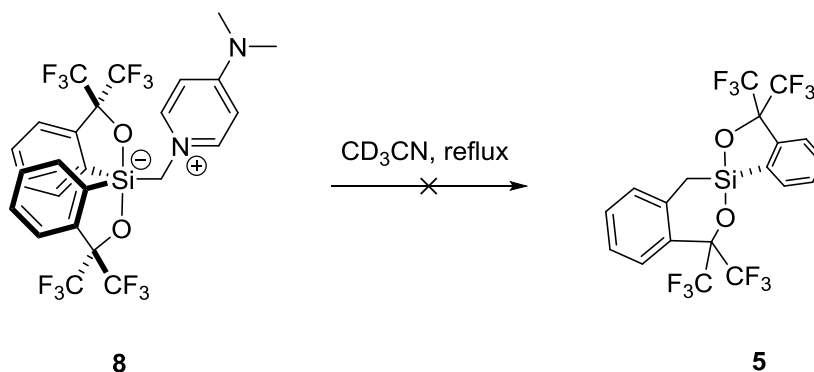

**8**

**5**

Thermal stability of silicate **8** was assessed by means of <sup>1</sup>H and <sup>19</sup>F NMR: Silicate **8** was added to a dried J. Young's tube with anhydrous acetonitrile-d<sub>3</sub>, and the mixture was refluxed overnight. No reaction occurred.

### III. NMR Spectra

<sup>1</sup>H, <sup>13</sup>C, <sup>19</sup>F, and <sup>1</sup>H/<sup>29</sup>Si HMQC NMR spectra of 2 in (CD<sub>3</sub>)<sub>2</sub>CO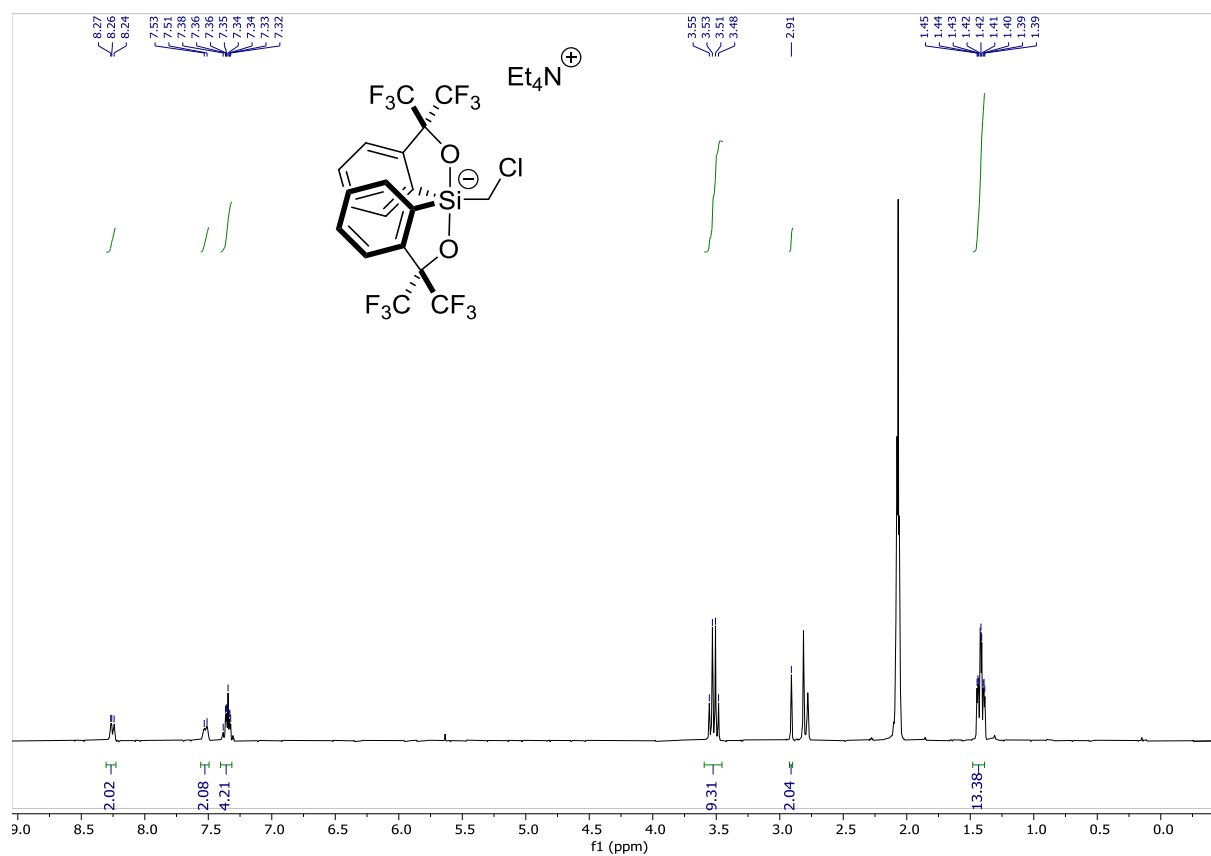

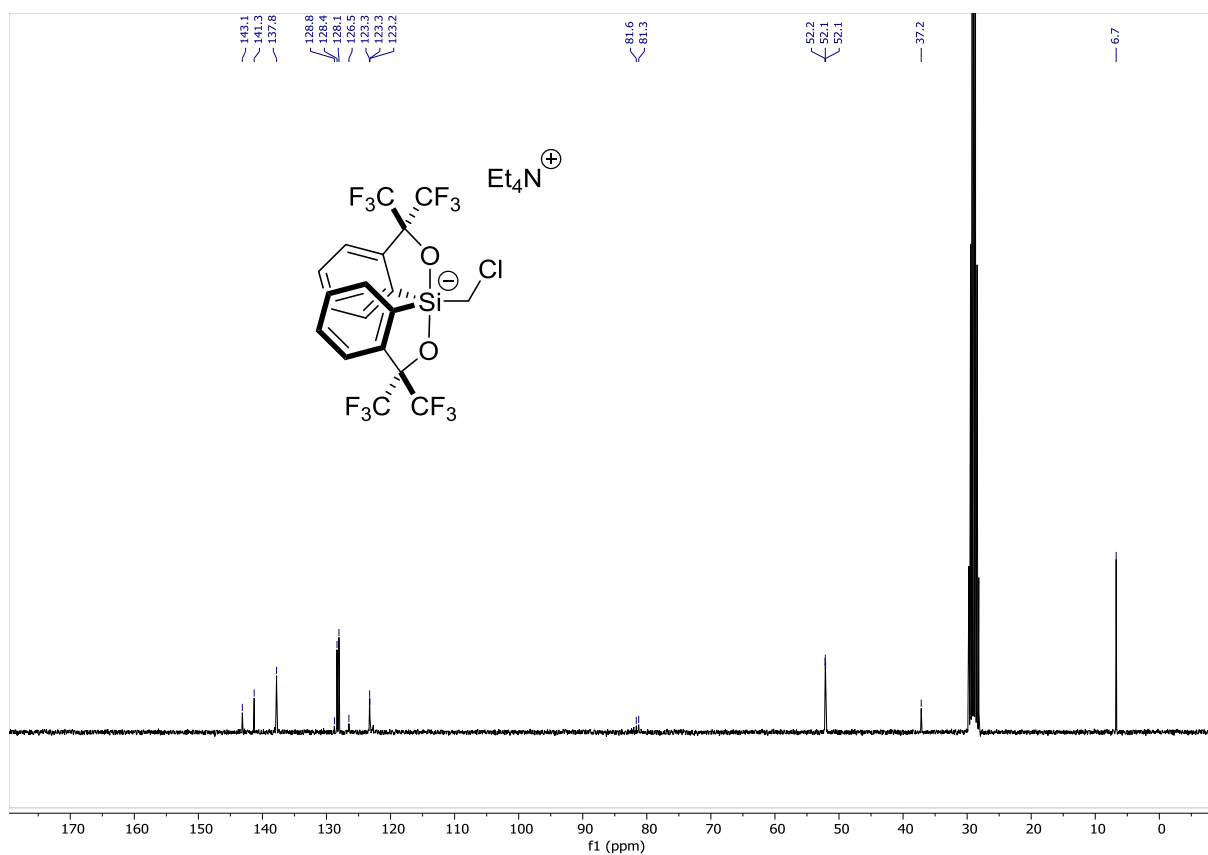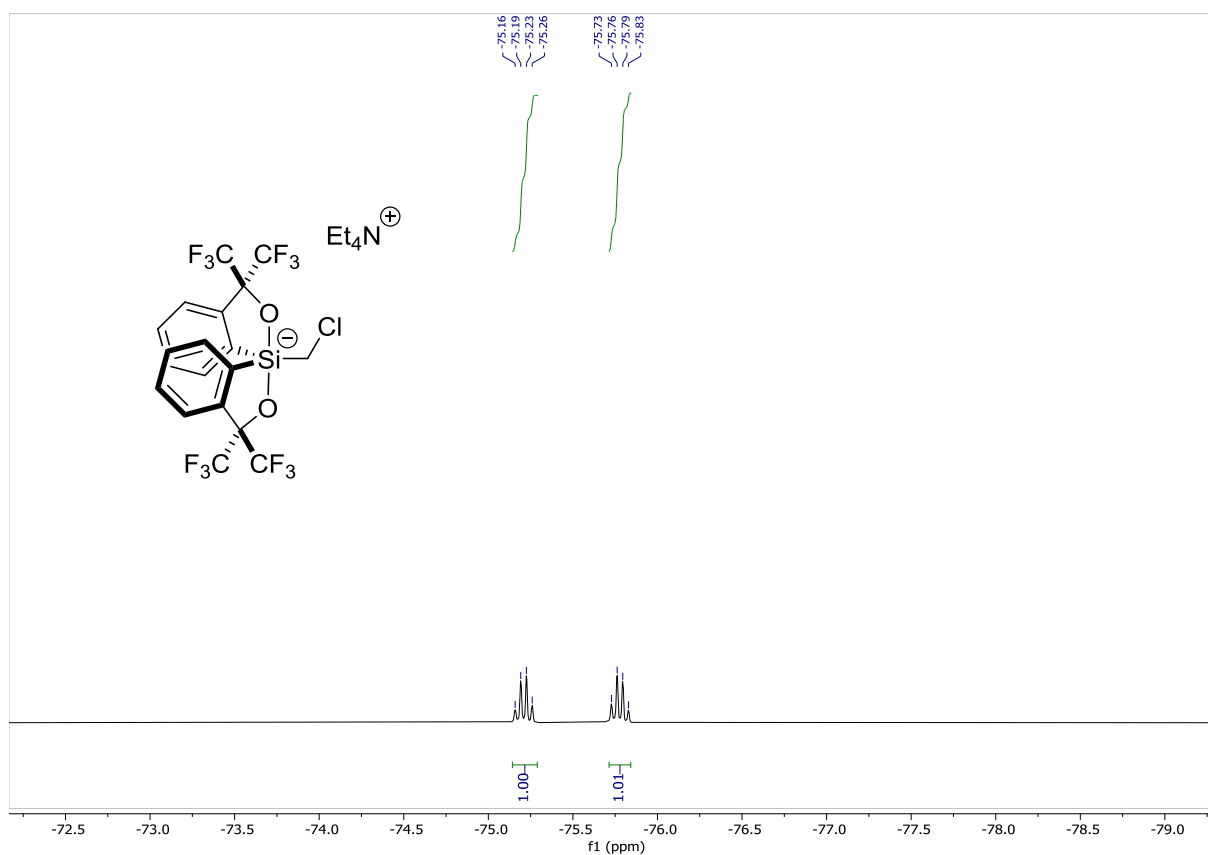



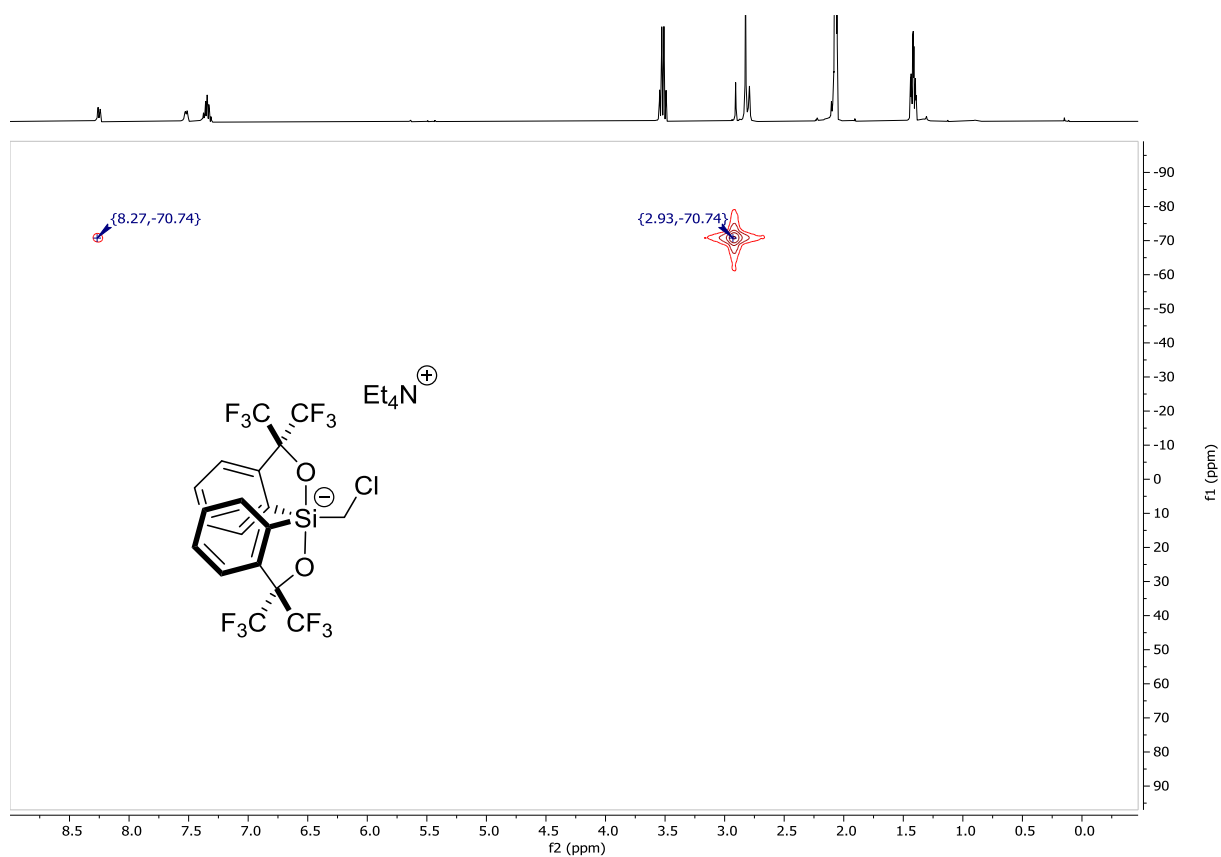

$^1\text{H}$ ,  $^{13}\text{C}$ ,  $^{19}\text{F}$ , and  $^1\text{H}/^{29}\text{Si}$  HMQC NMR spectra of 3b in  $(\text{CD}_3)_2\text{CO}$

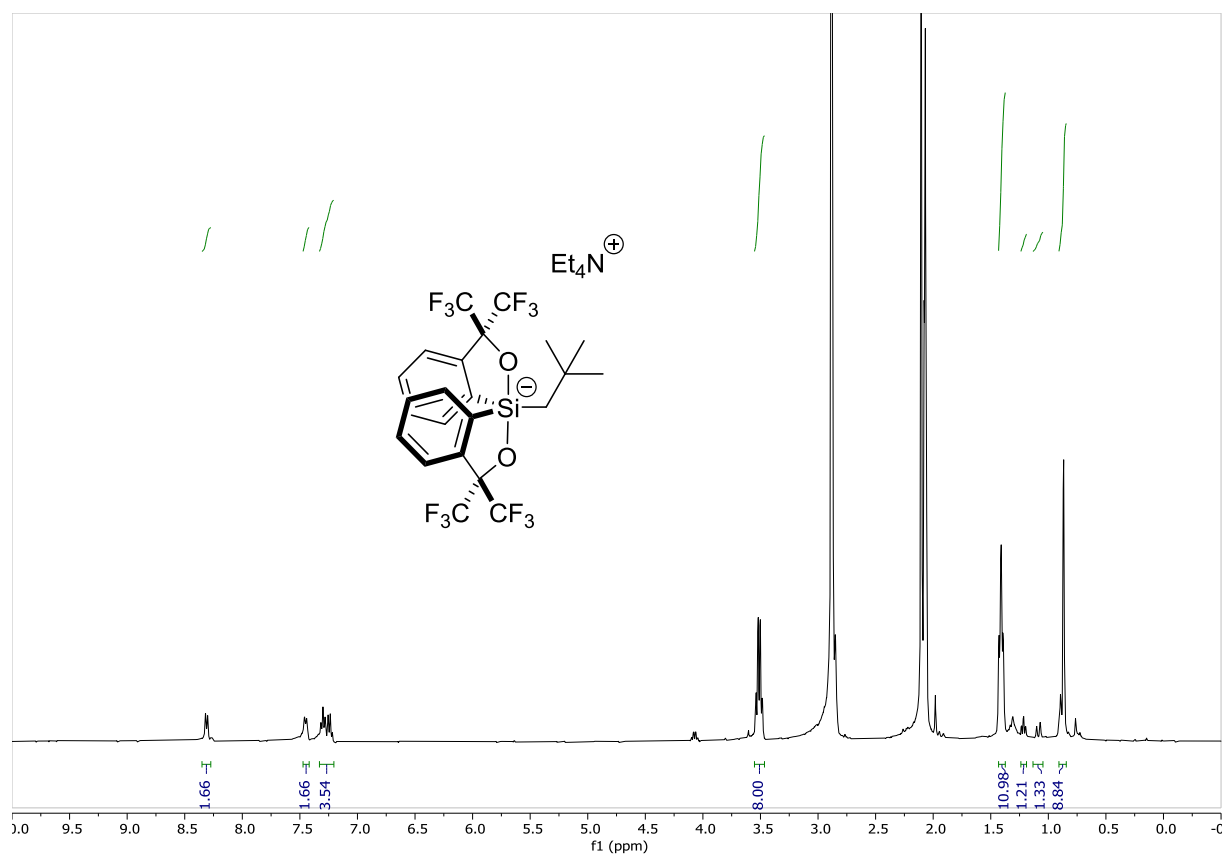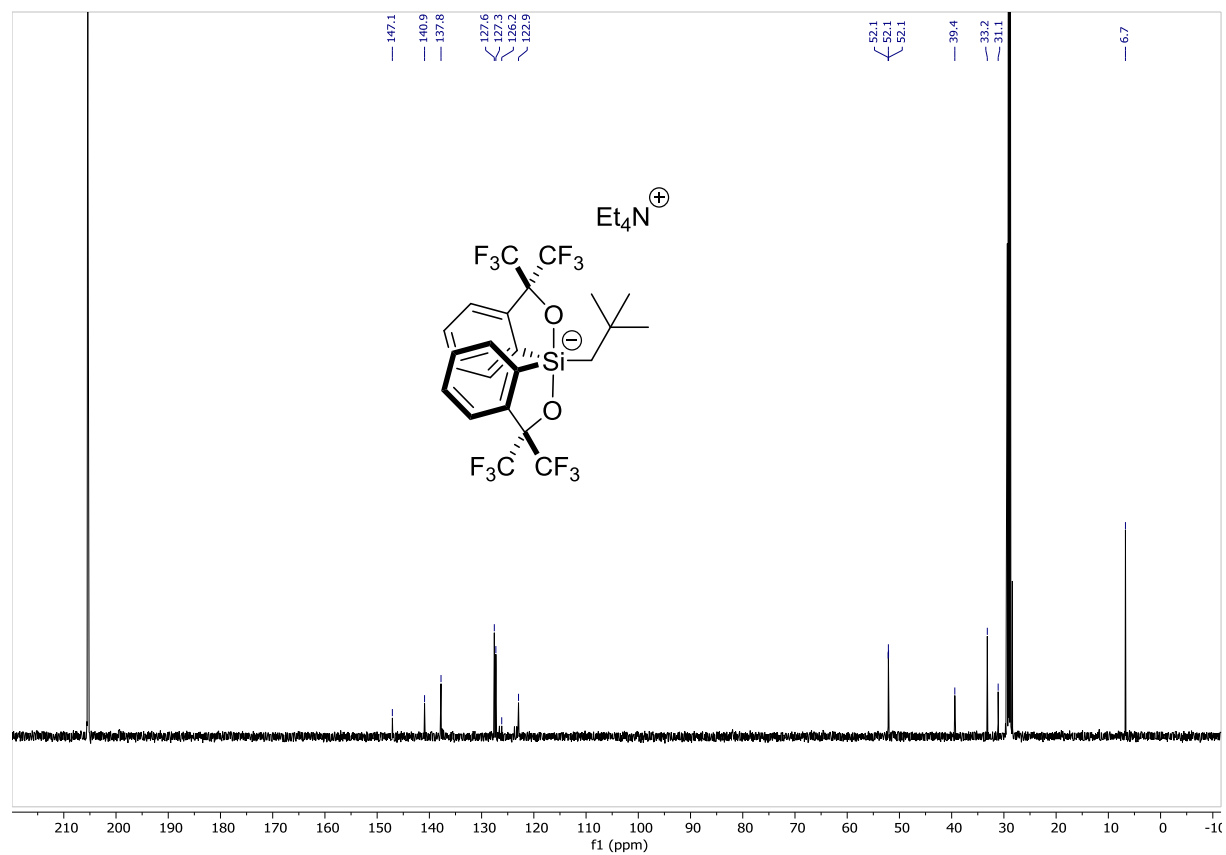

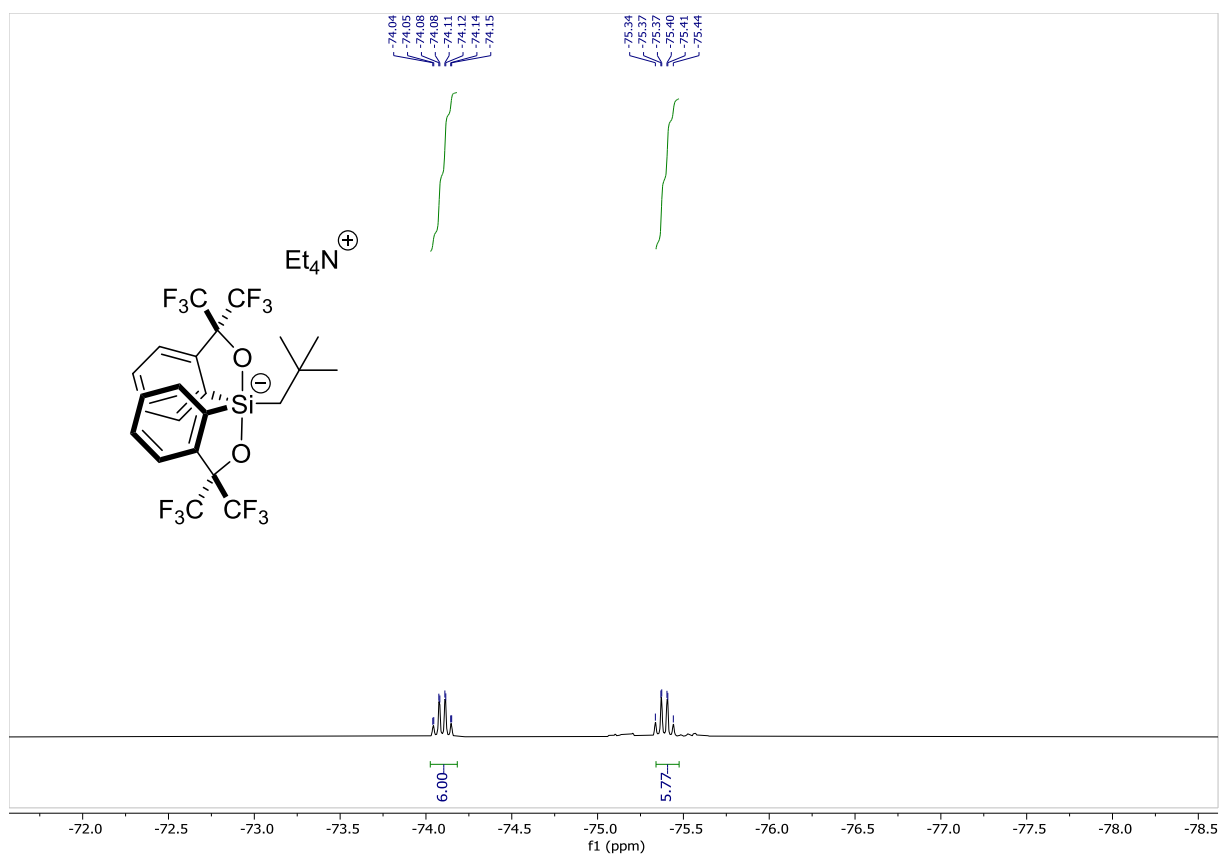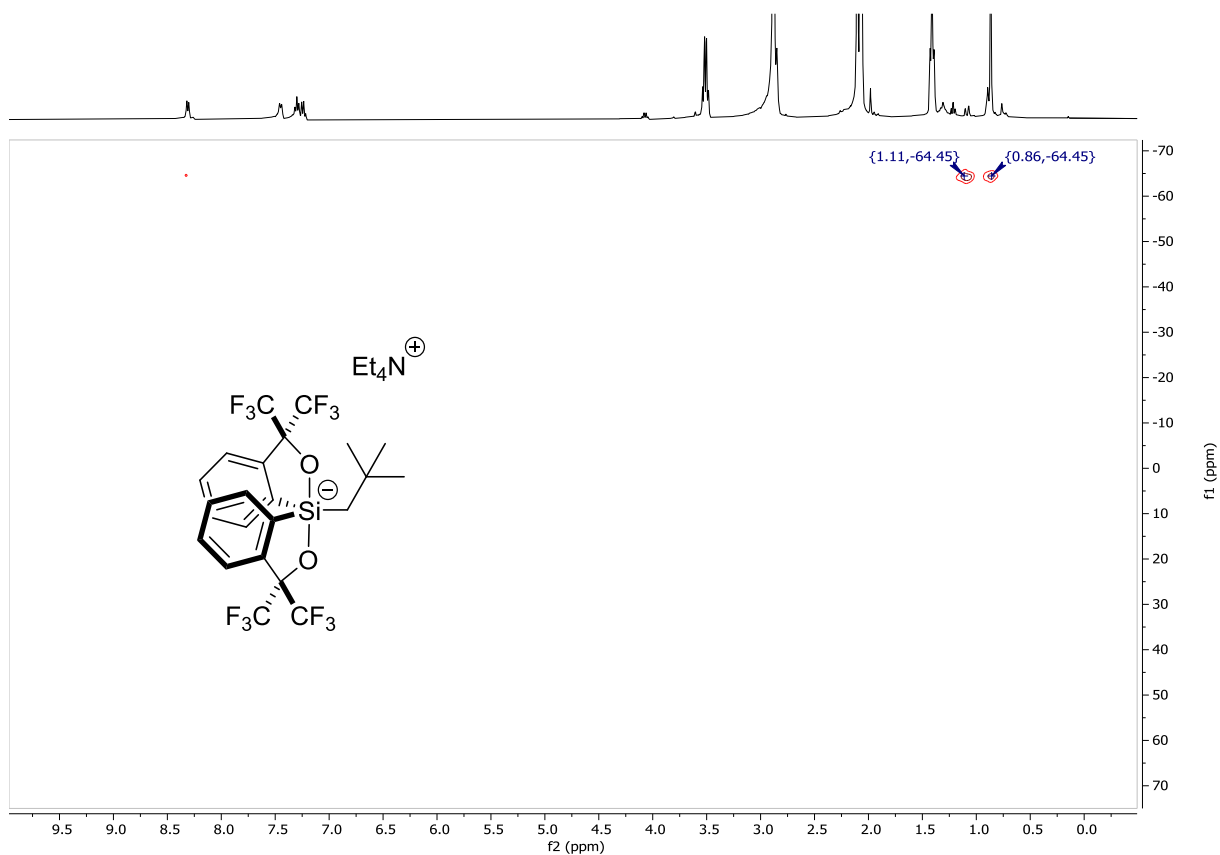

$^1\text{H}$ ,  $^{13}\text{C}$ ,  $^{19}\text{F}$ , and  $^1\text{H}/^{29}\text{Si}$  HMQC NMR spectra of 3c in  $(\text{CD}_3)_2\text{CO}$

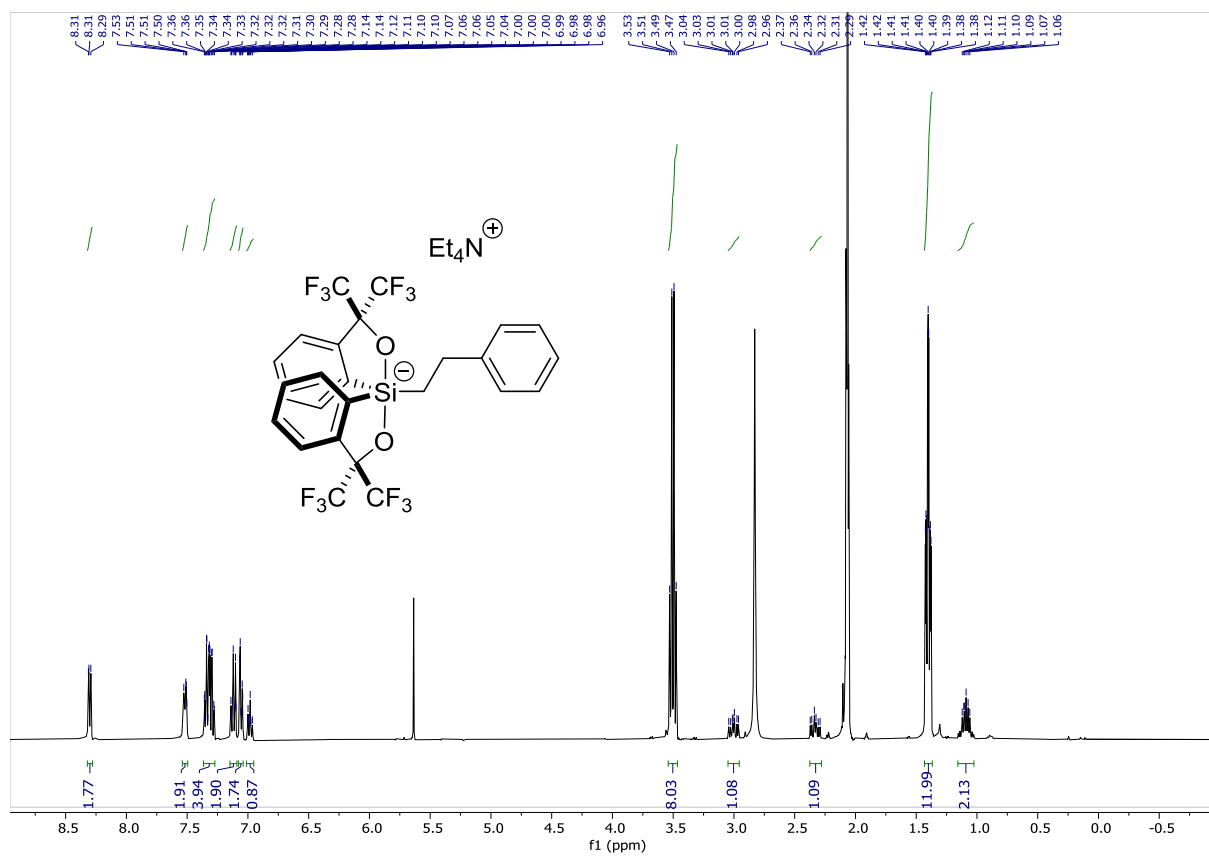

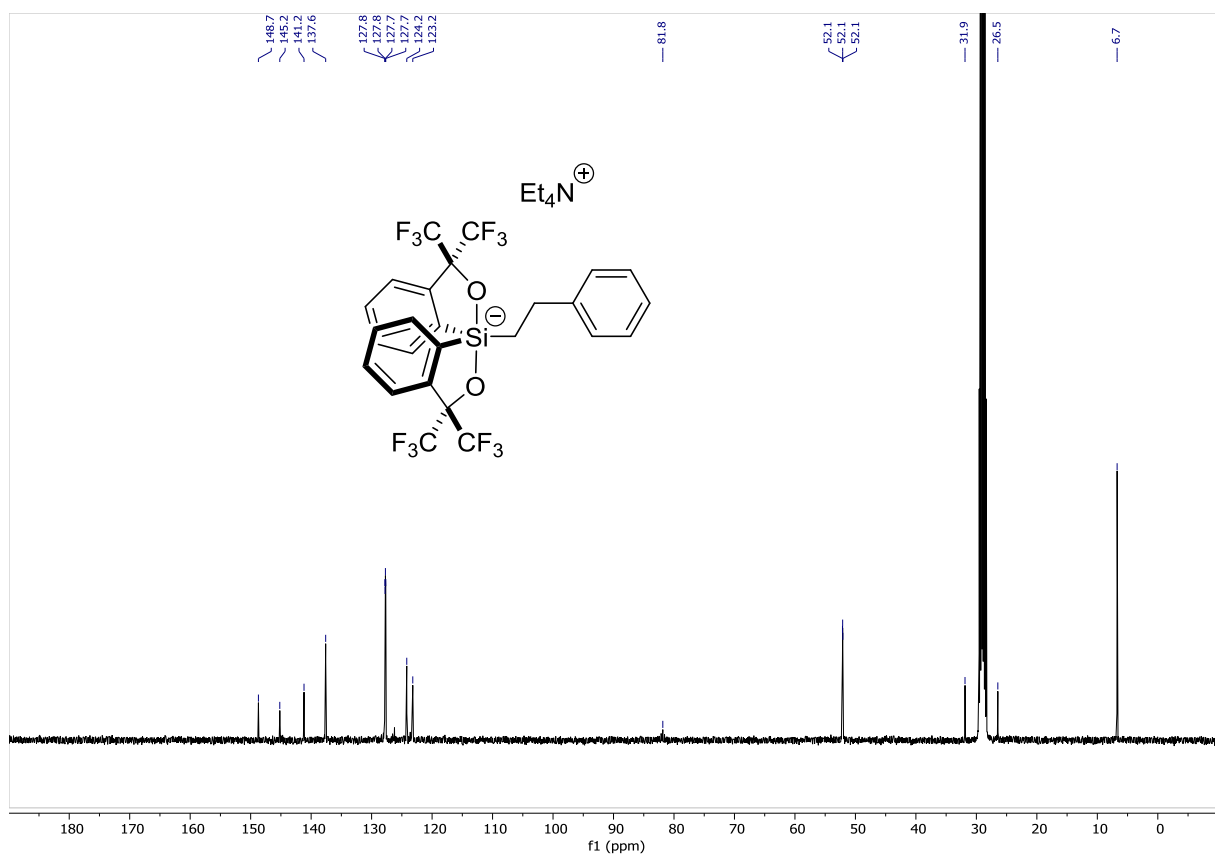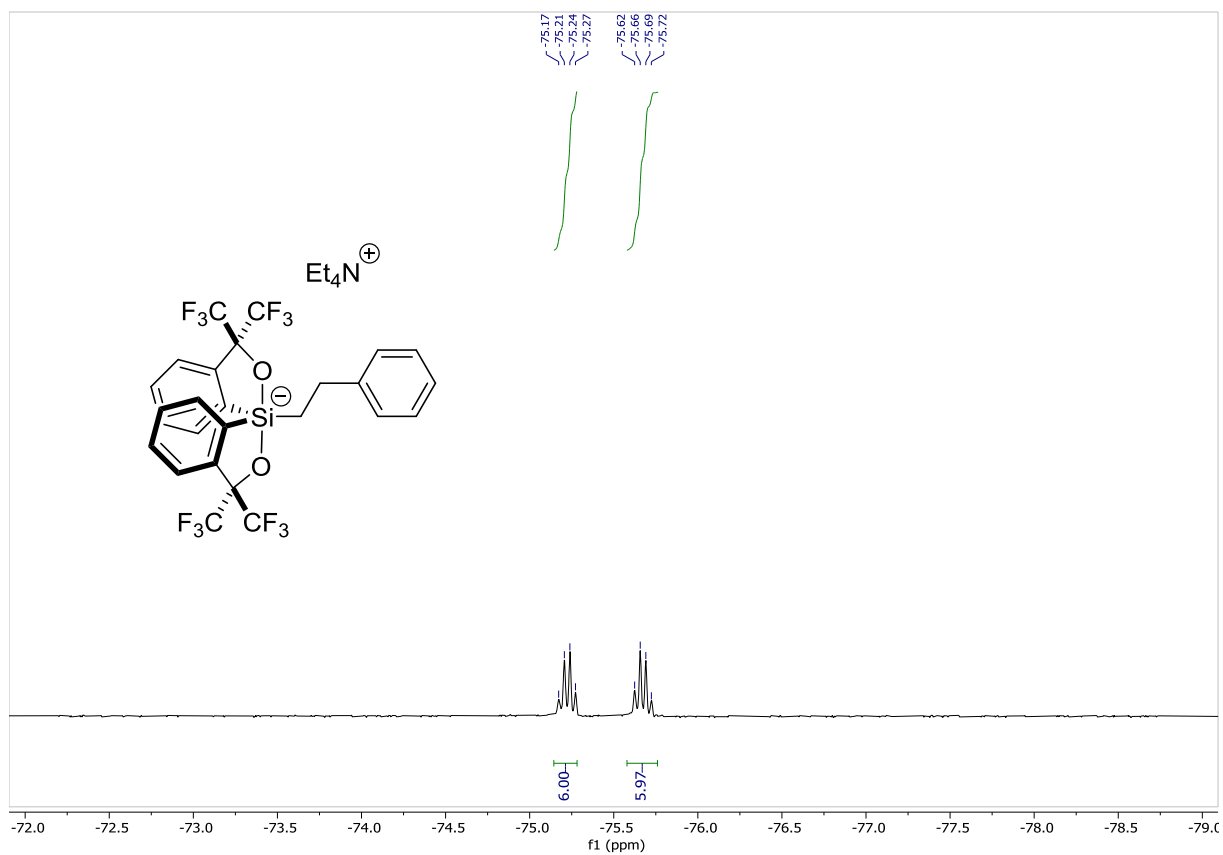

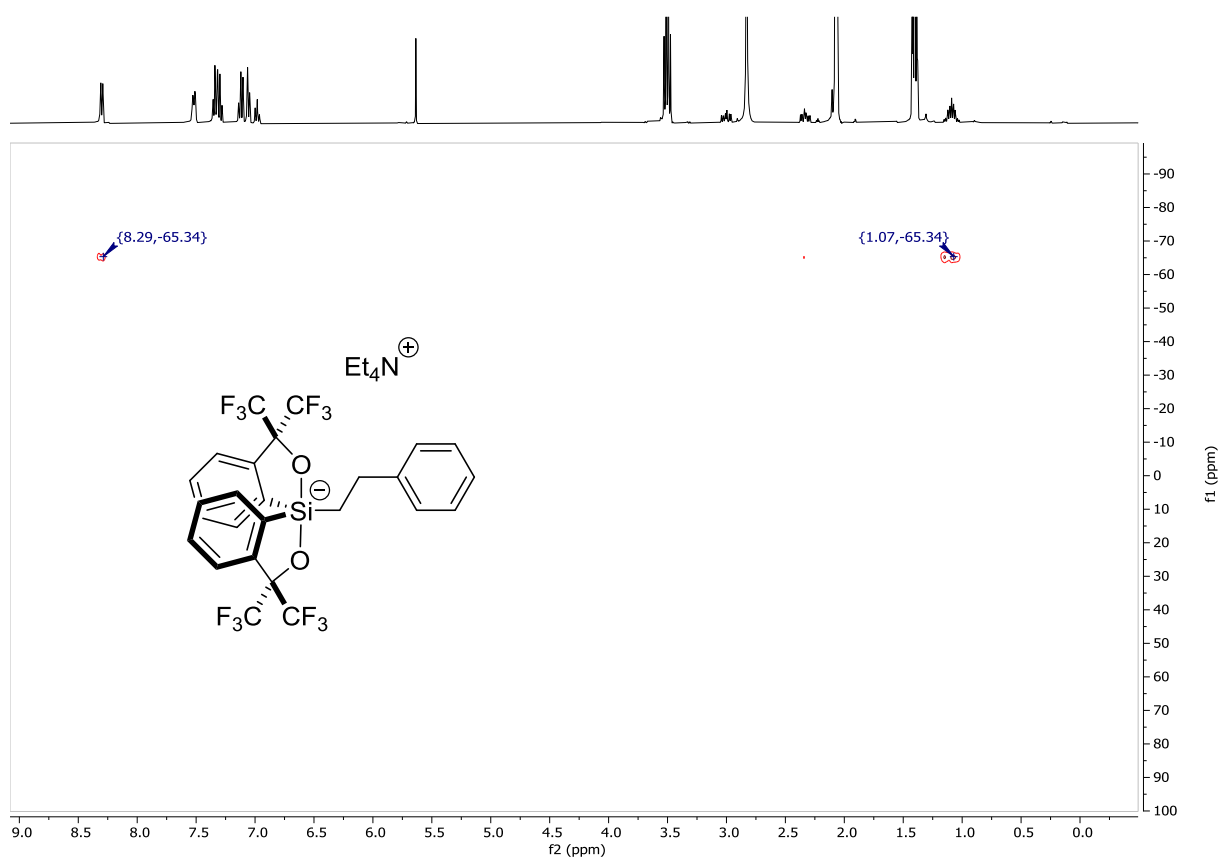

$^1\text{H}$ ,  $^{13}\text{C}$ ,  $^{19}\text{F}$ , and  $^1\text{H}/^{29}\text{Si}$  HMQC NMR spectra of mixture 3d/4d in  $(\text{CD}_3)_2\text{CO}$

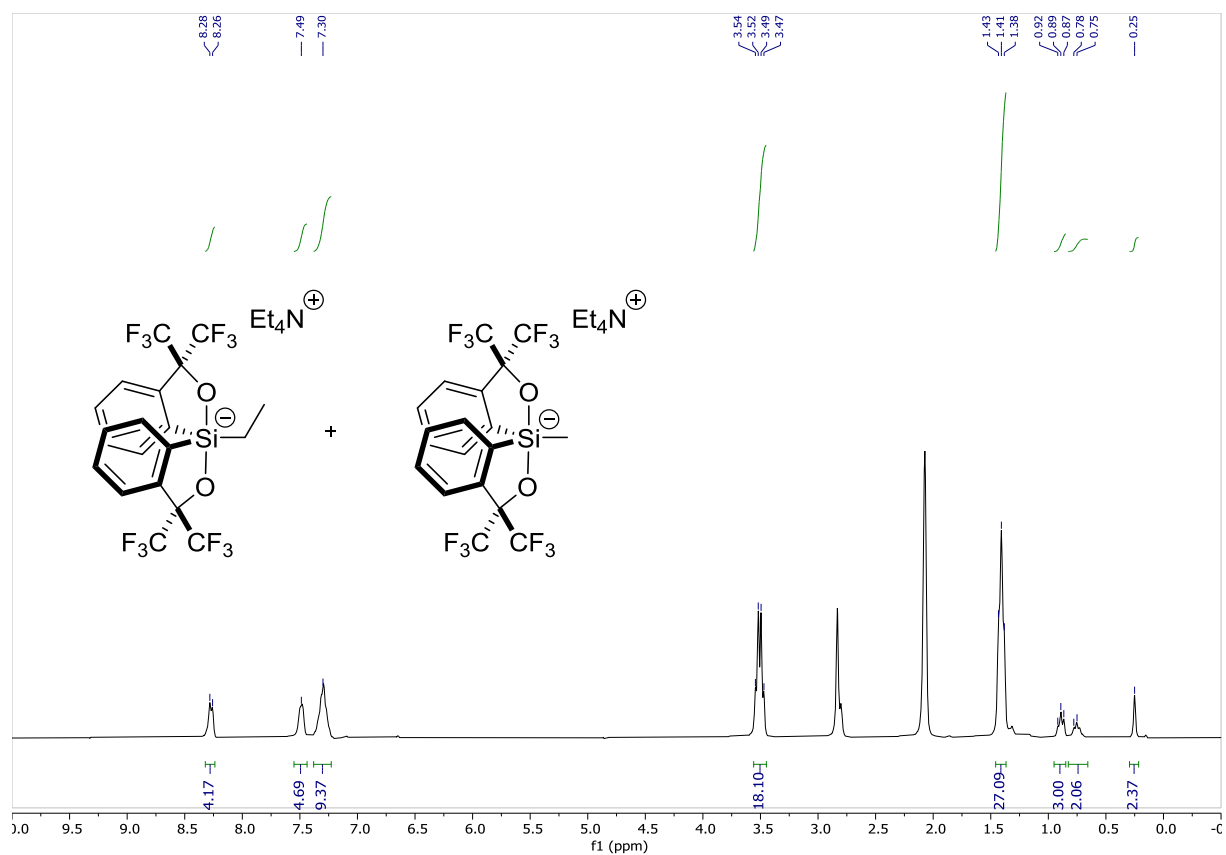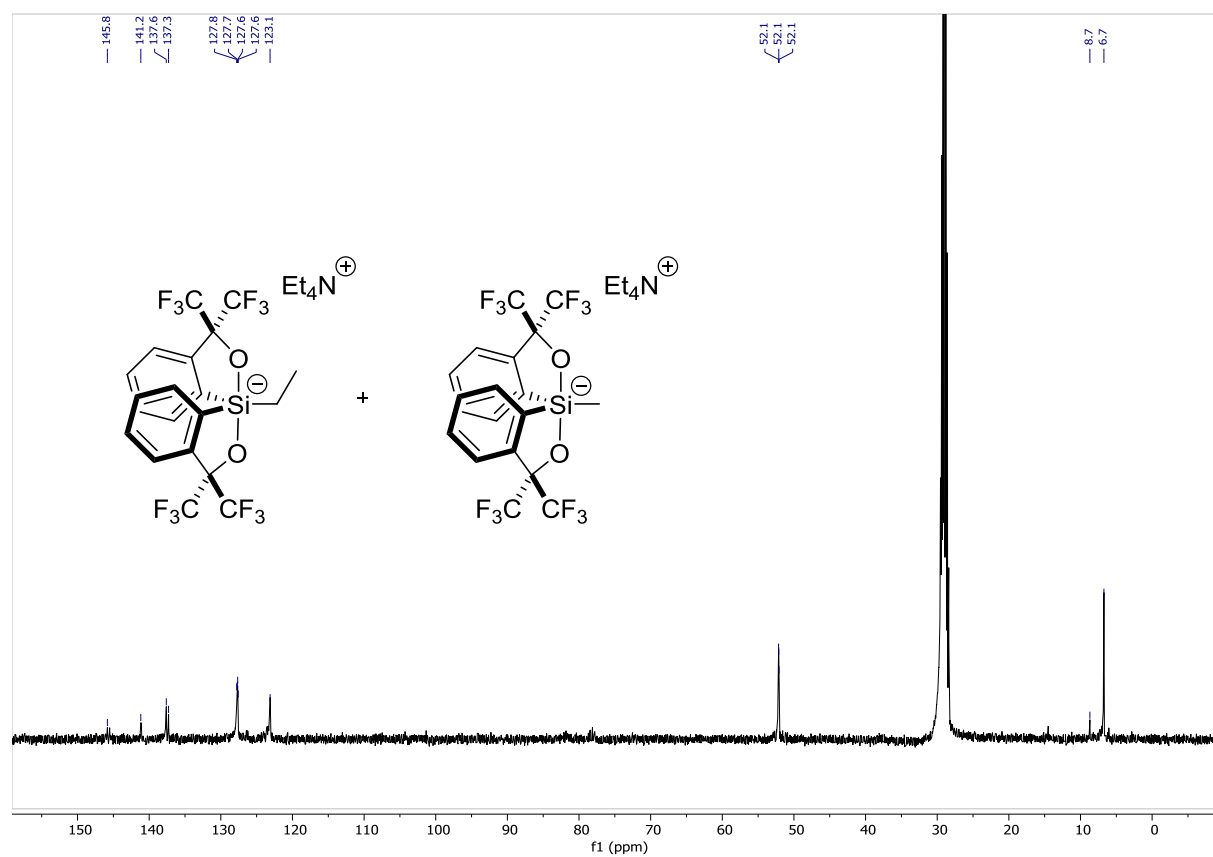

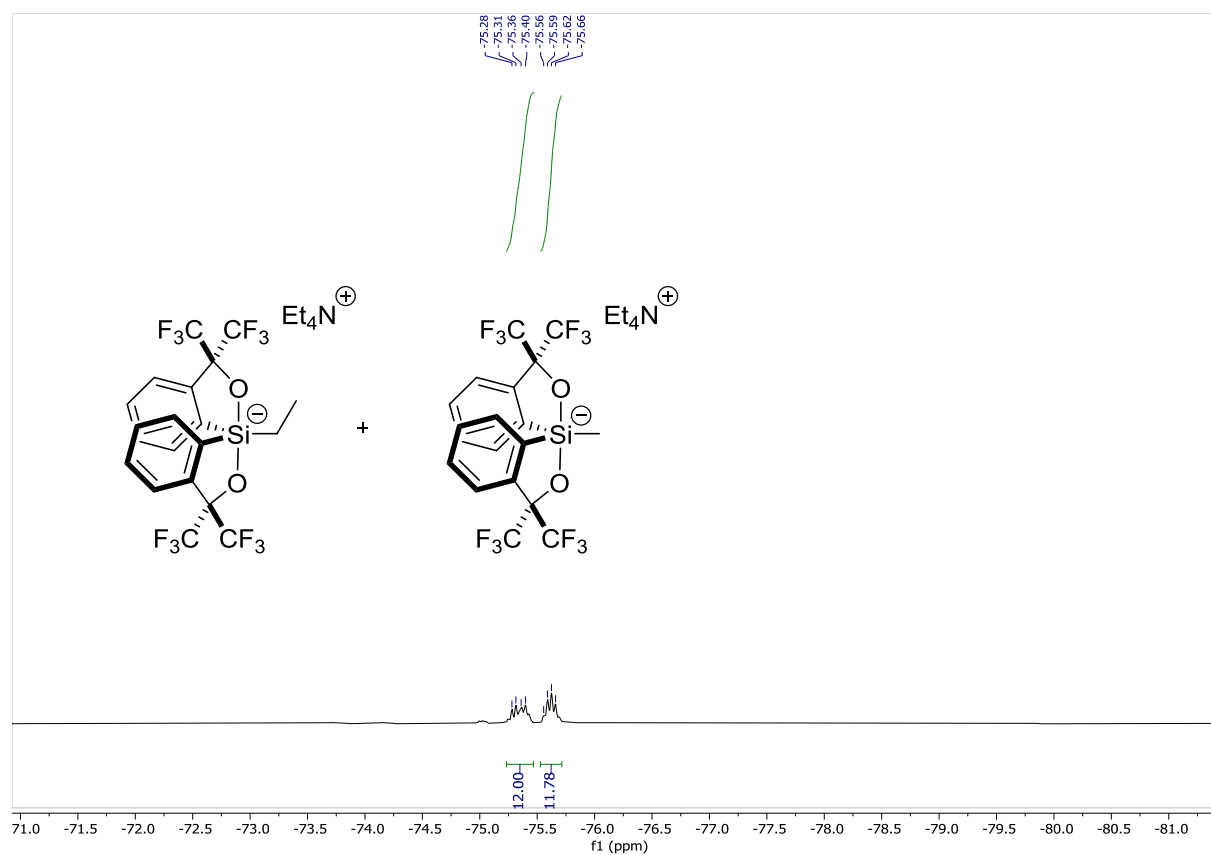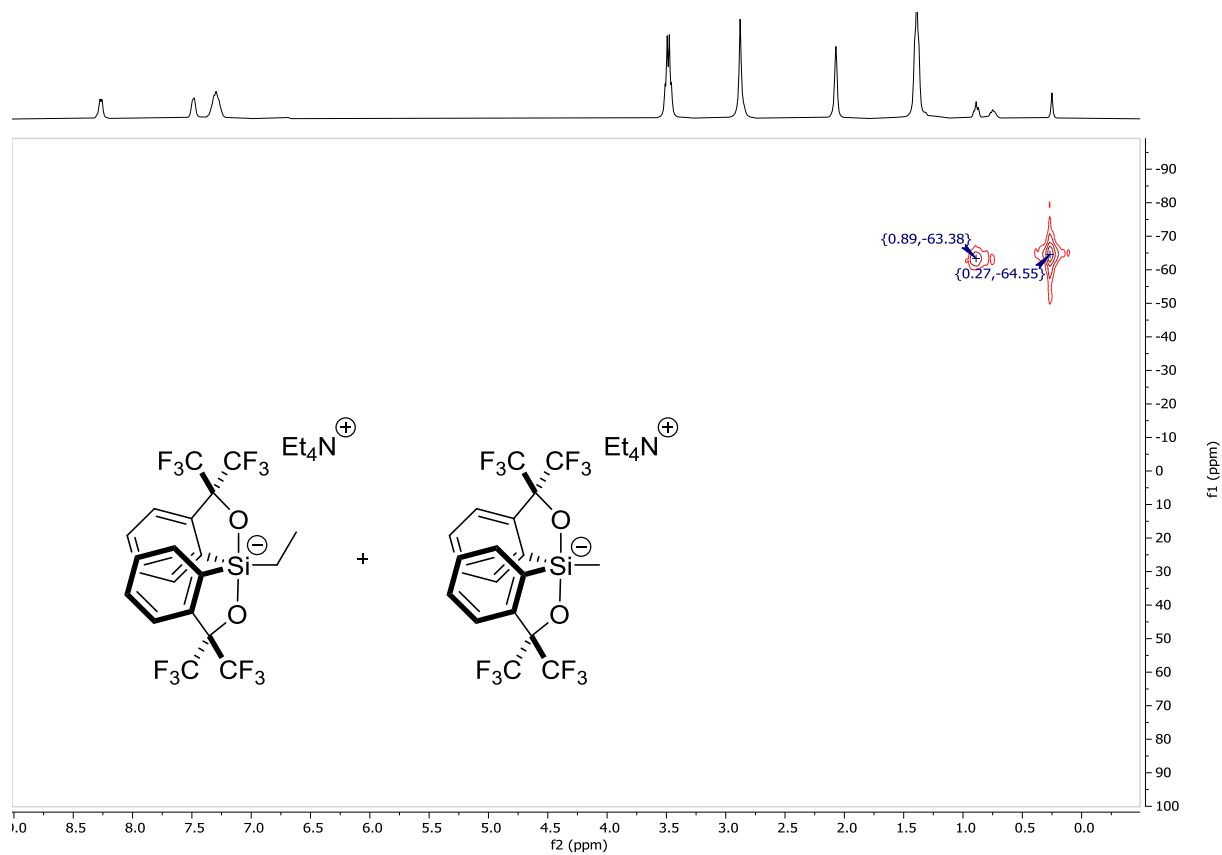



$^1\text{H}$ ,  $^{13}\text{C}$ ,  $^{19}\text{F}$ , and  $^1\text{H}/^{29}\text{Si}$  HMQC NMR spectra of mixture 3e/4e in  $(\text{CD}_3)_2\text{CO}$  and 4e in  $(\text{CD}_3)_2\text{CO}$

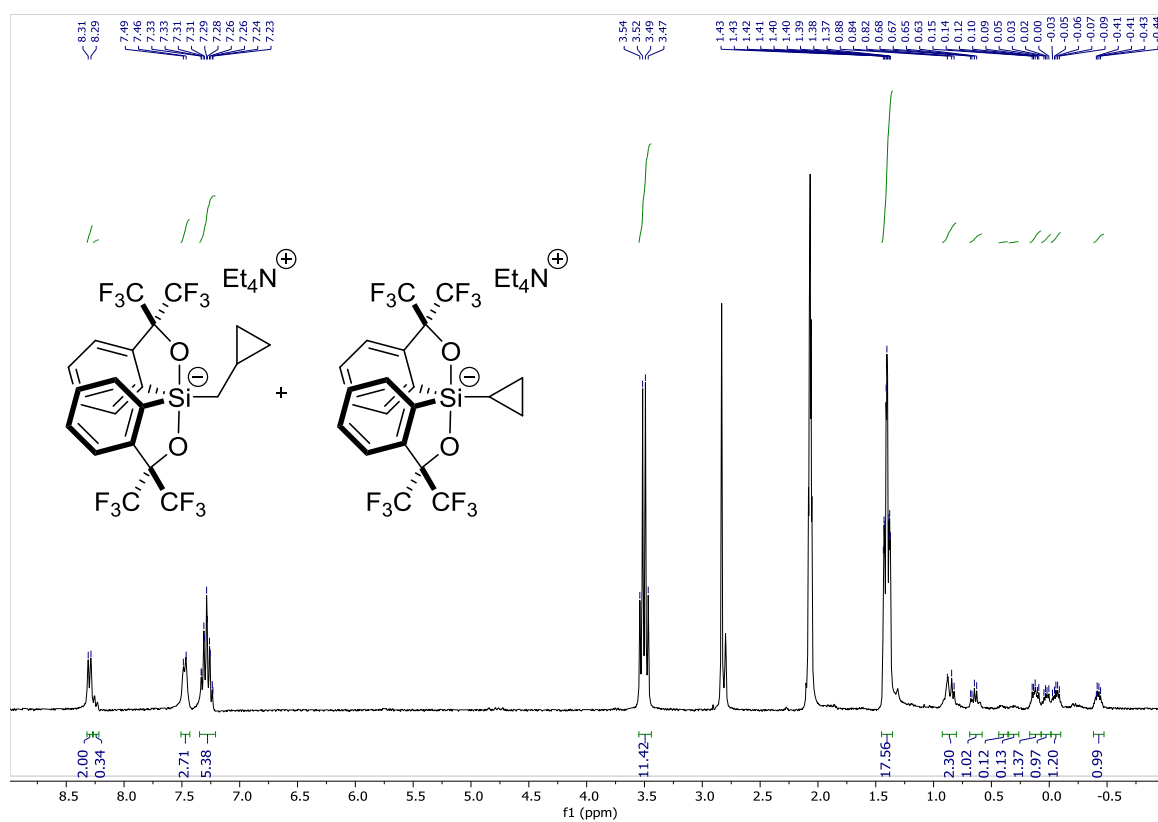

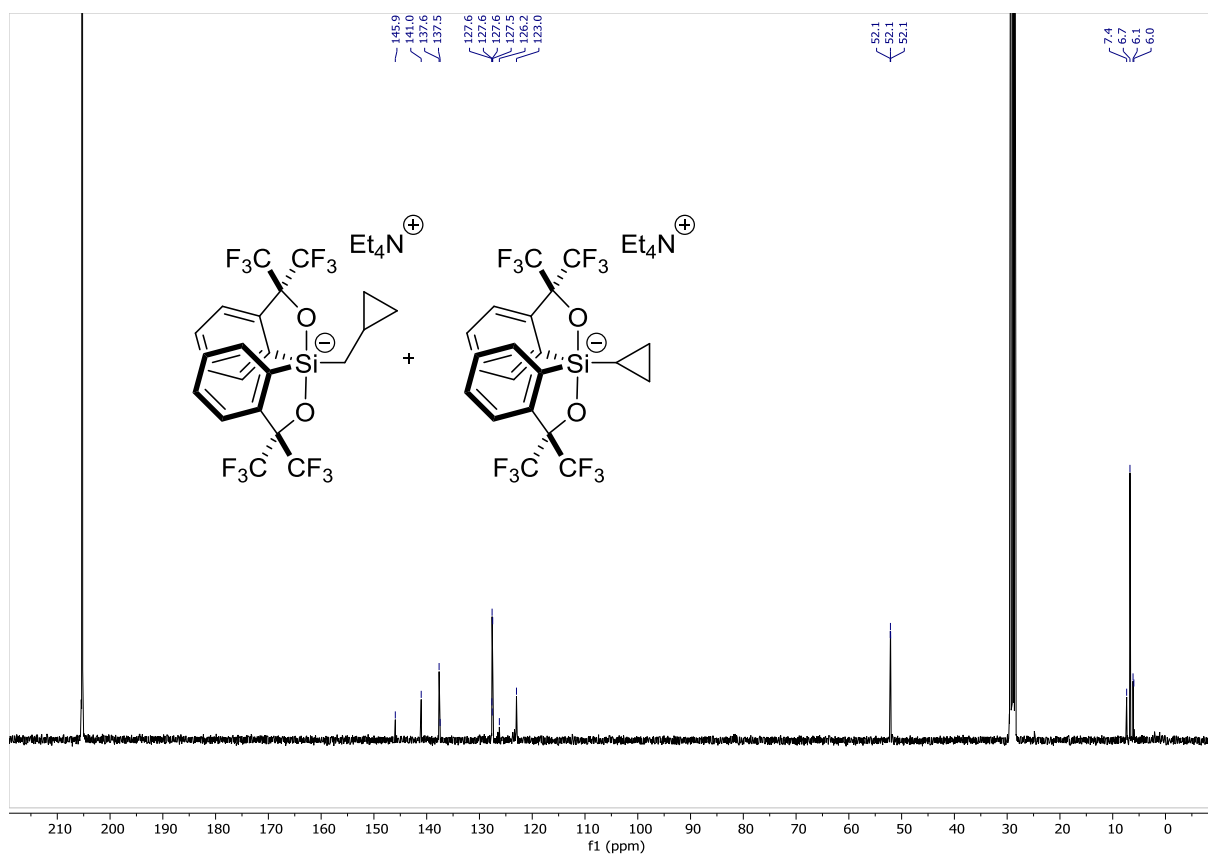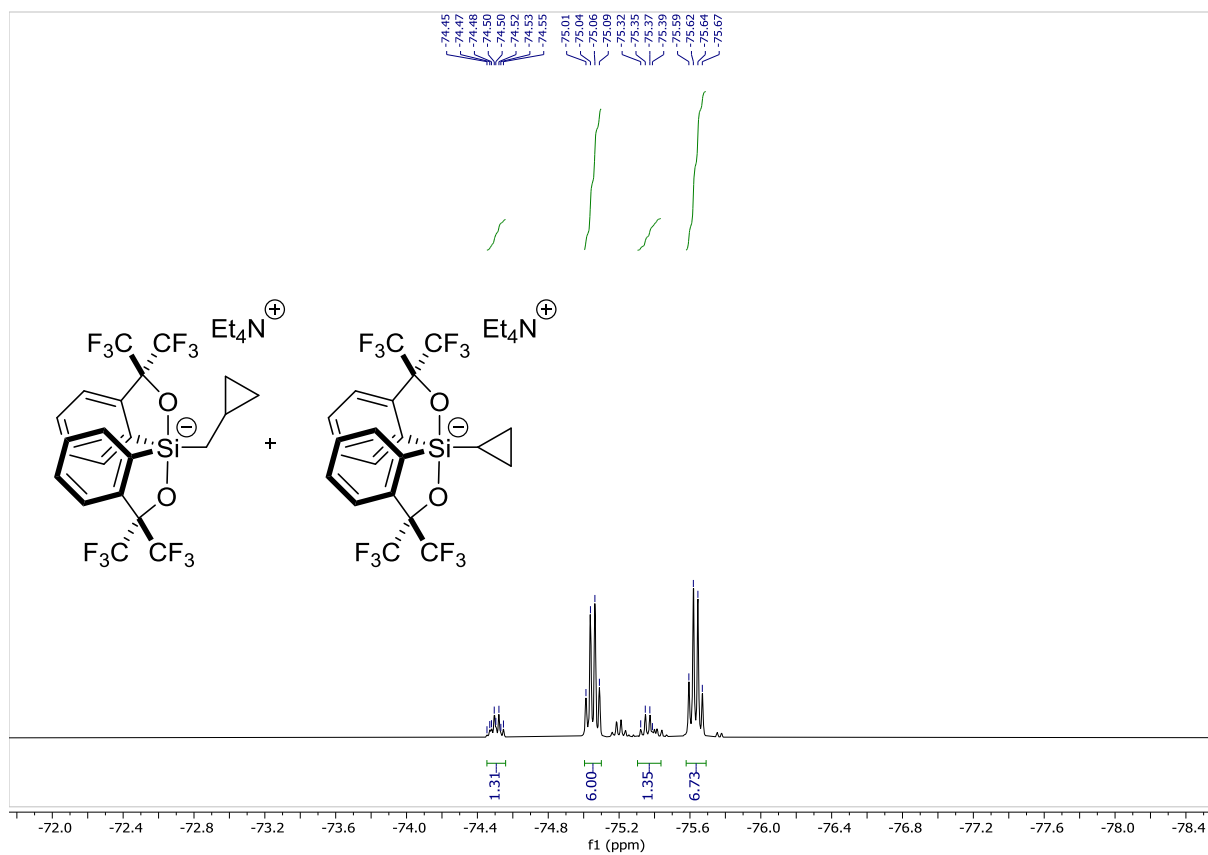

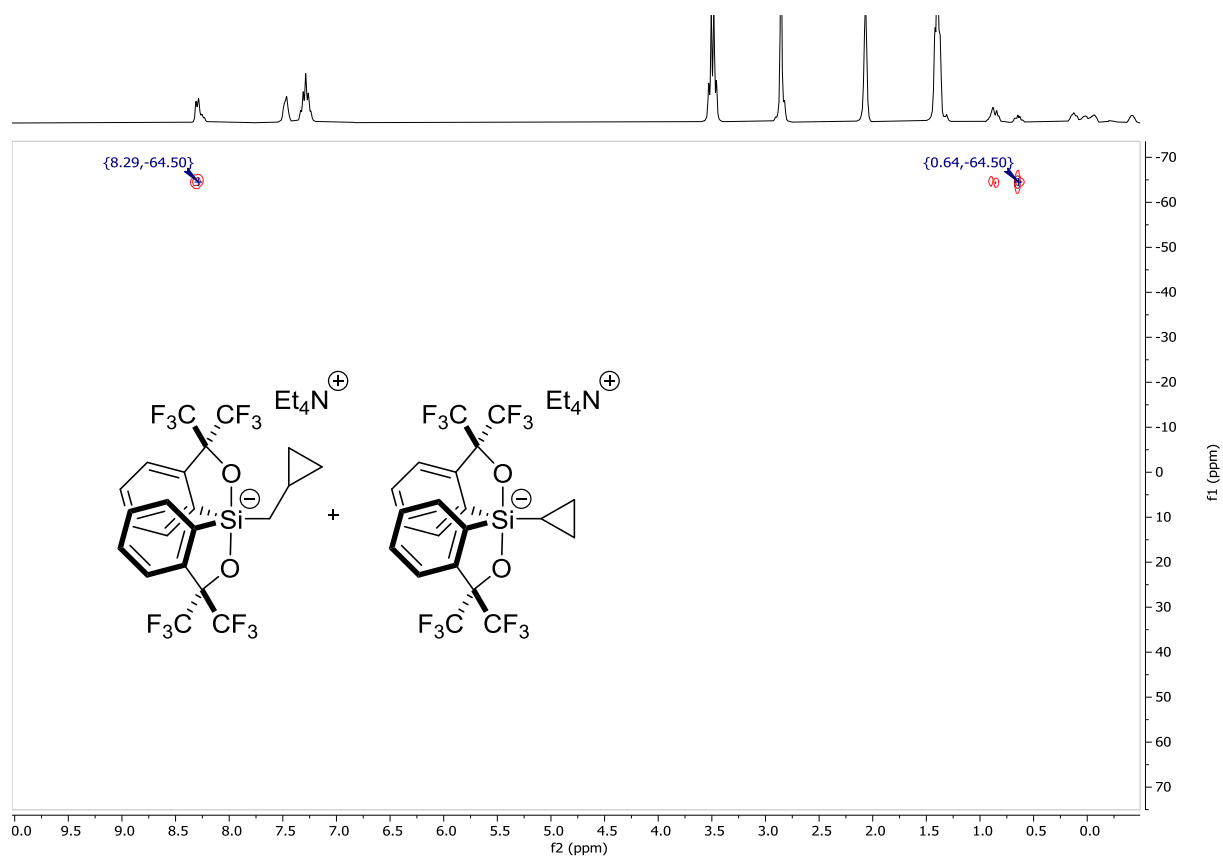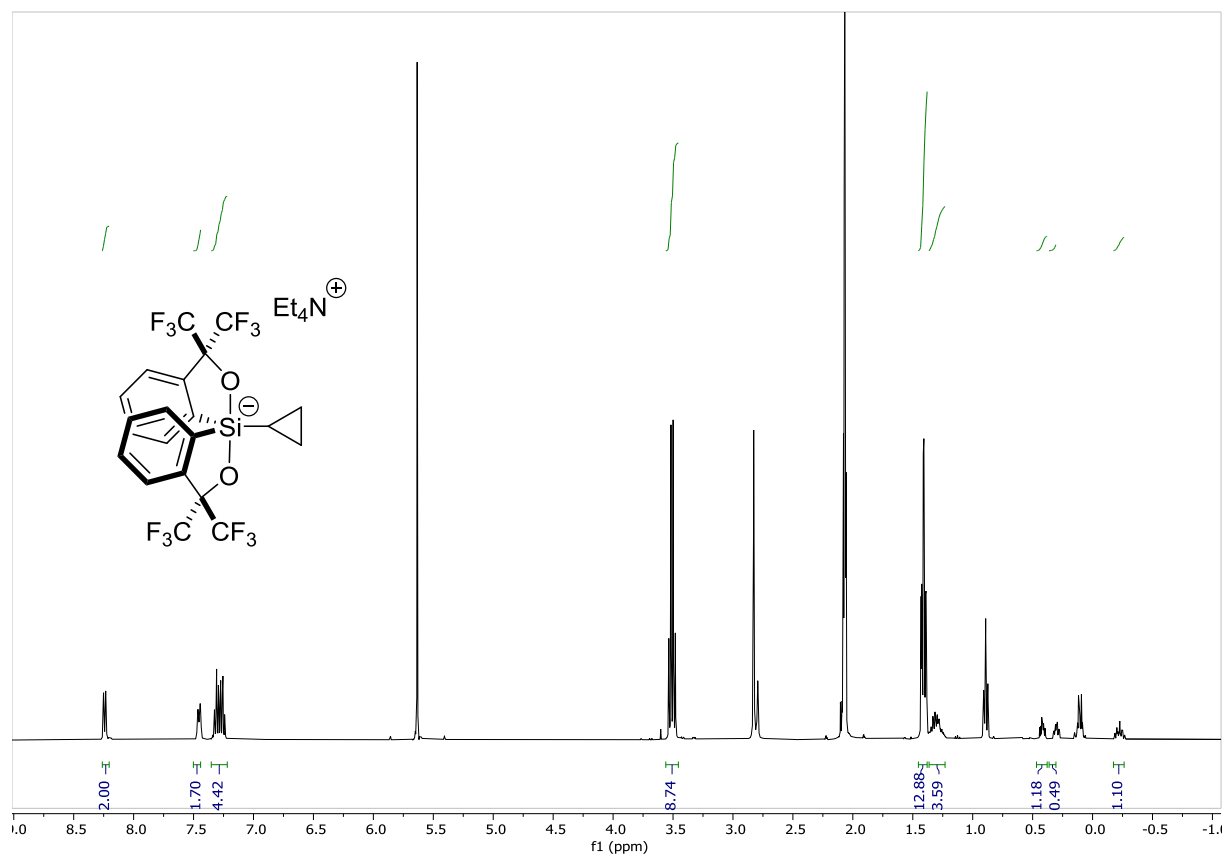

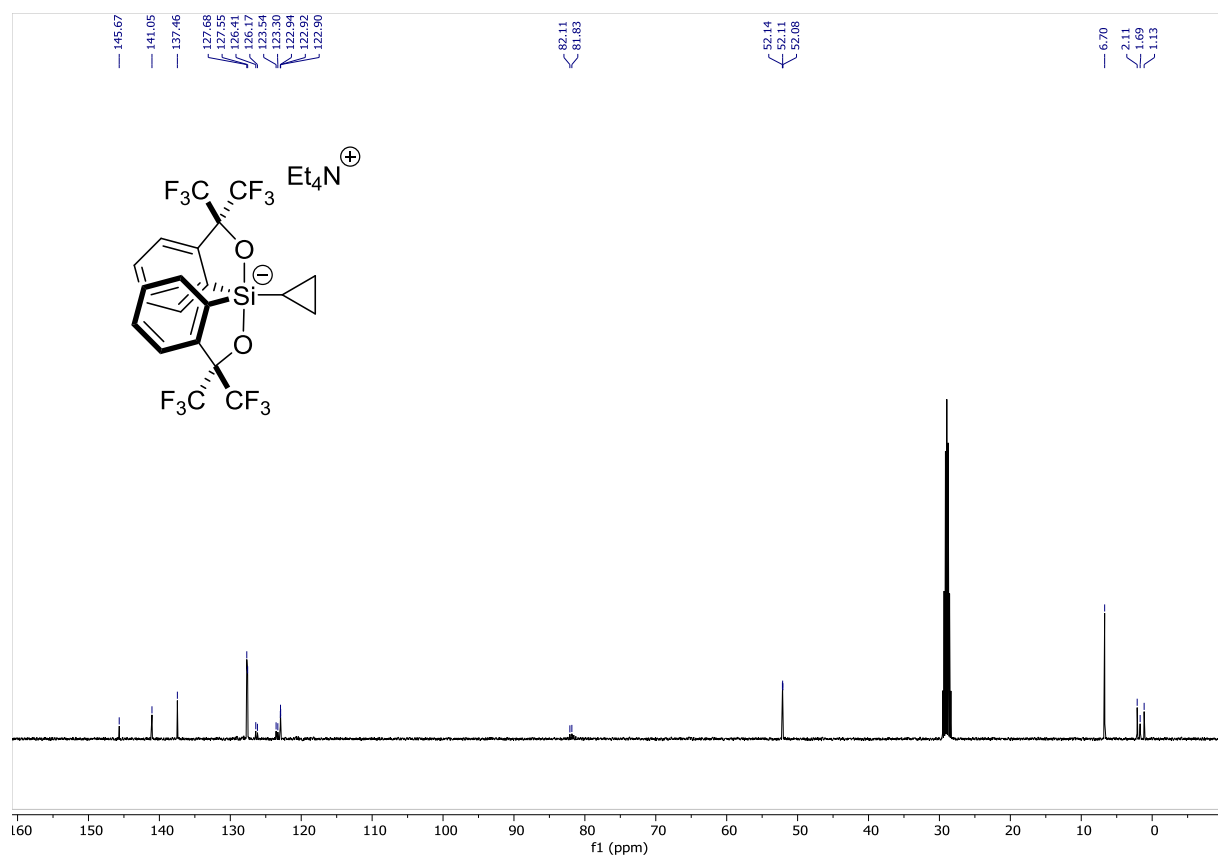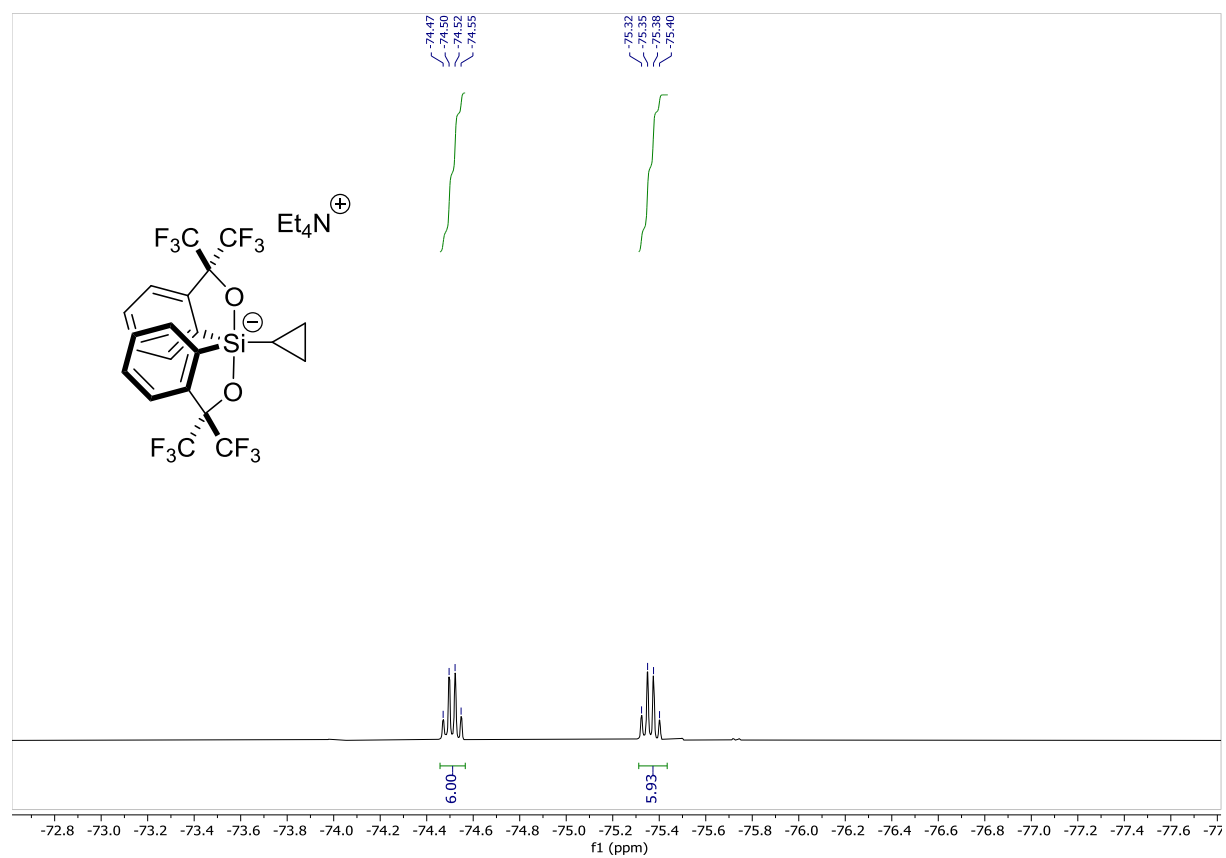

$^1\text{H}$ ,  $^{13}\text{C}$ ,  $^{19}\text{F}$ , and  $^1\text{H}/^{29}\text{Si}$  HMQC NMR spectra of 3f in  $(\text{CD}_3)_2\text{CO}$

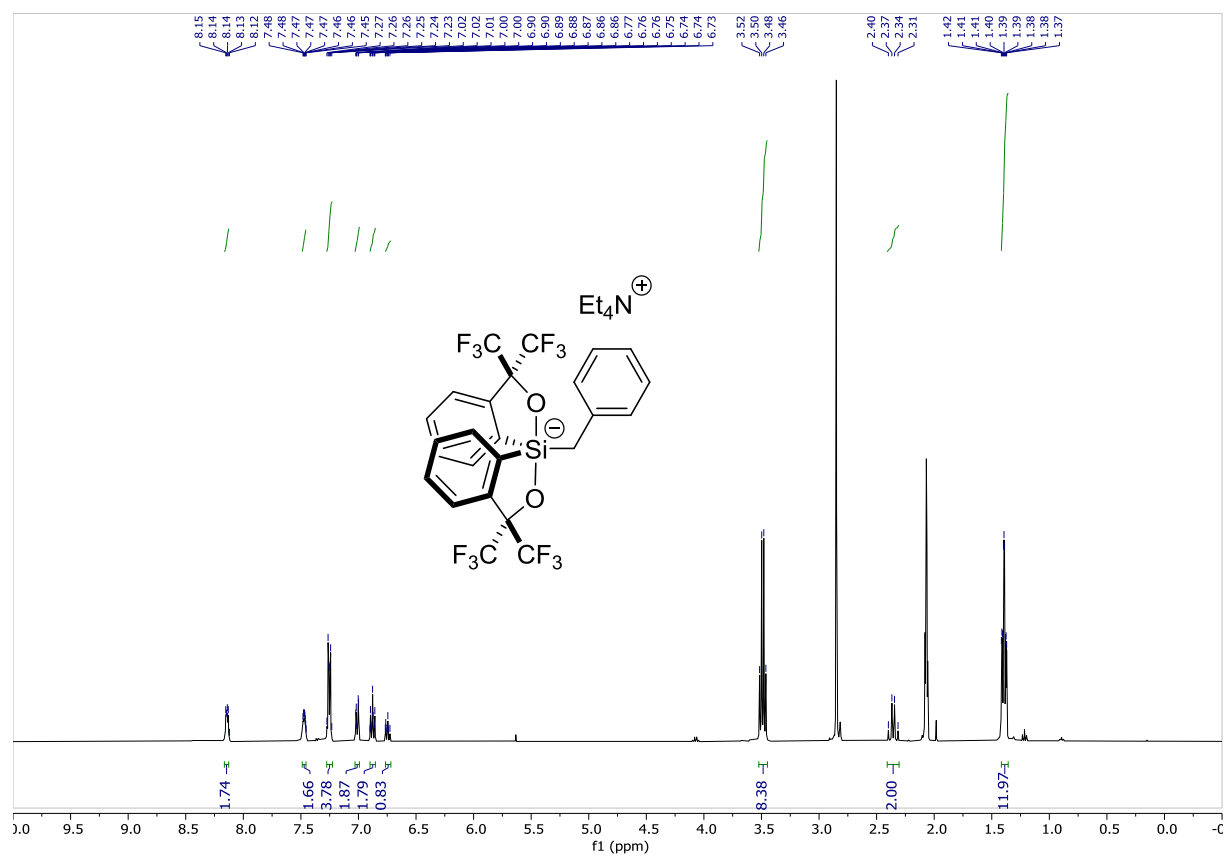

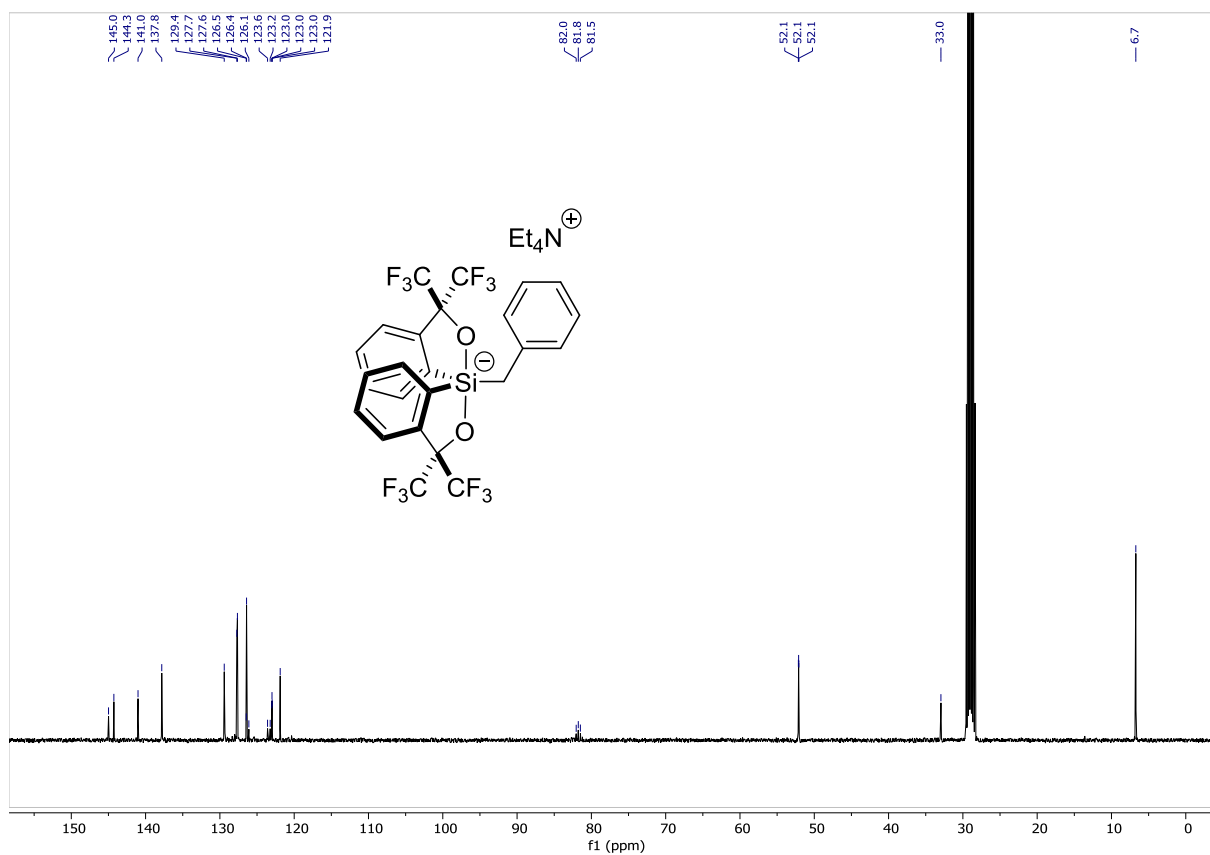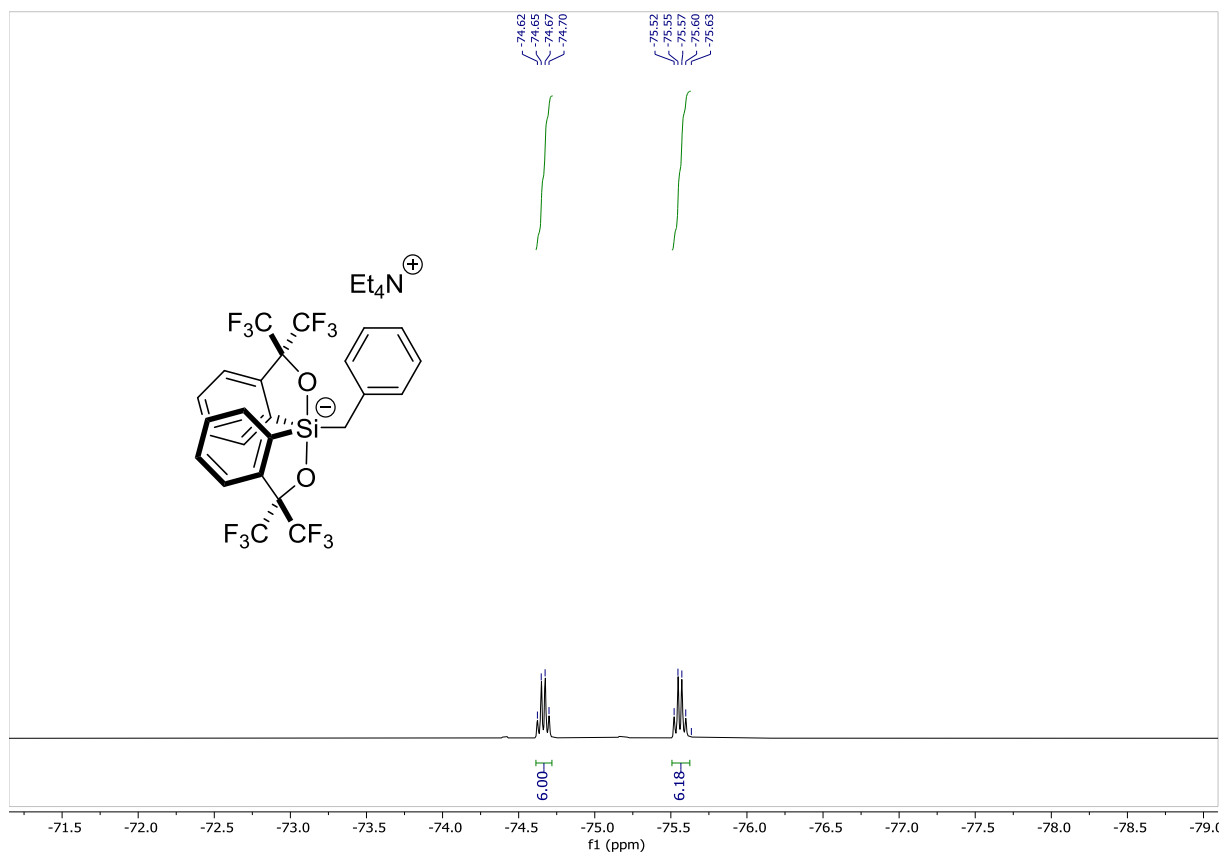

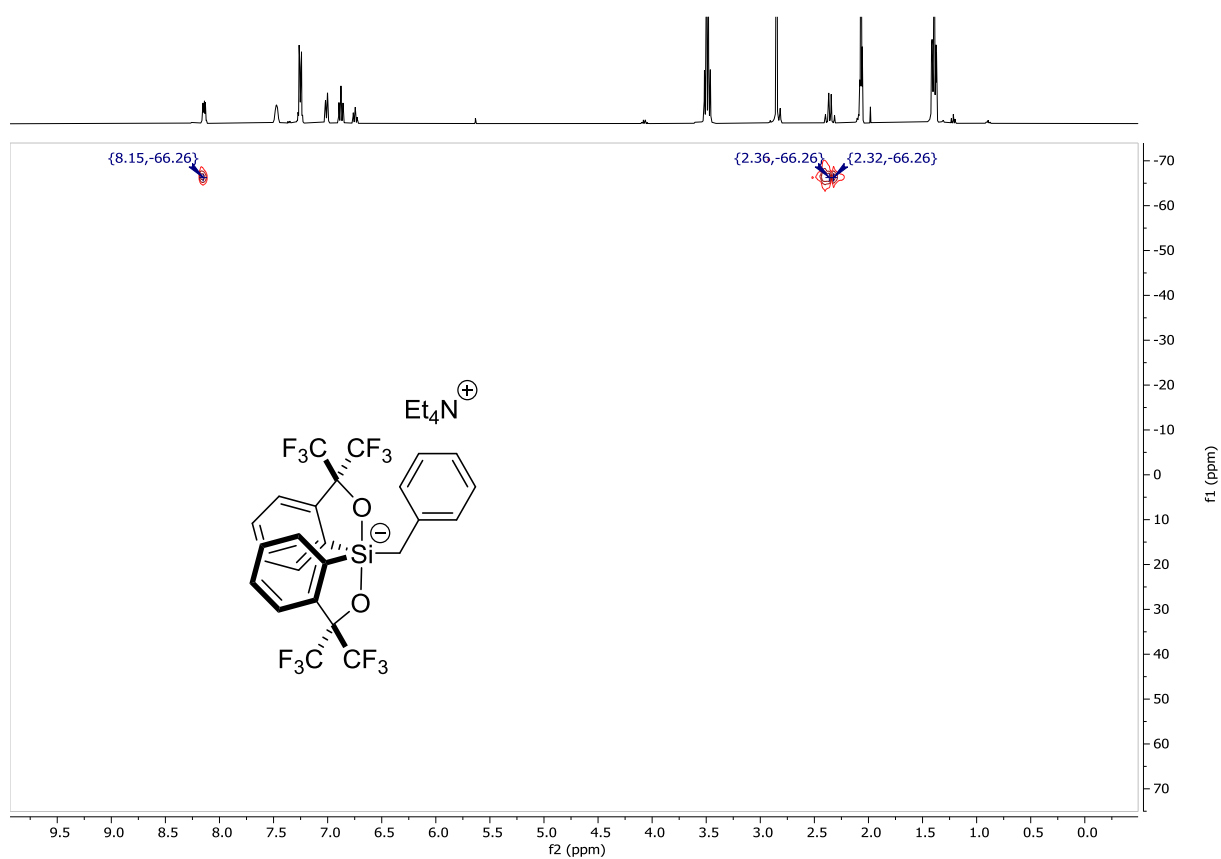

$^1\text{H}$ ,  $^{13}\text{C}$ ,  $^{19}\text{F}$ , and  $^1\text{H}/^{29}\text{Si}$  HMQC NMR spectra of 3g in  $(\text{CD}_3)_2\text{CO}$

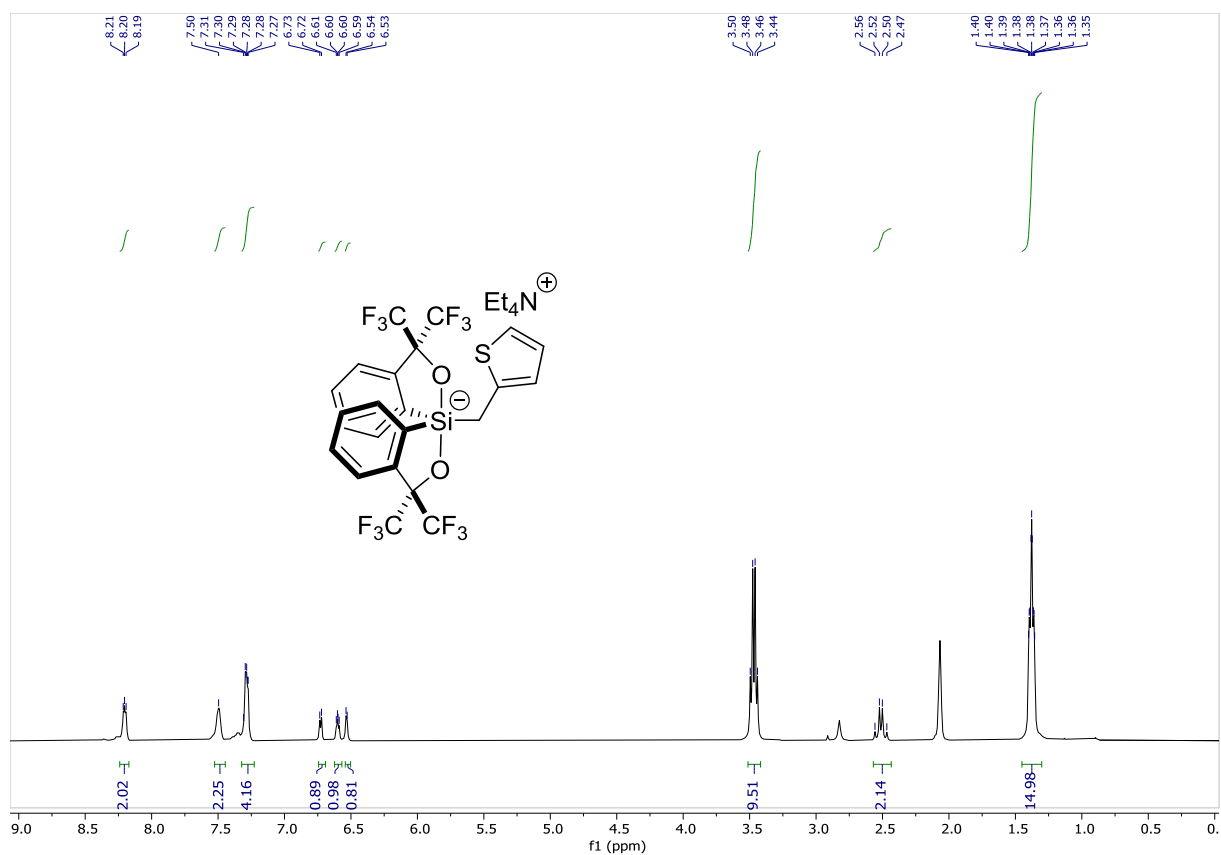



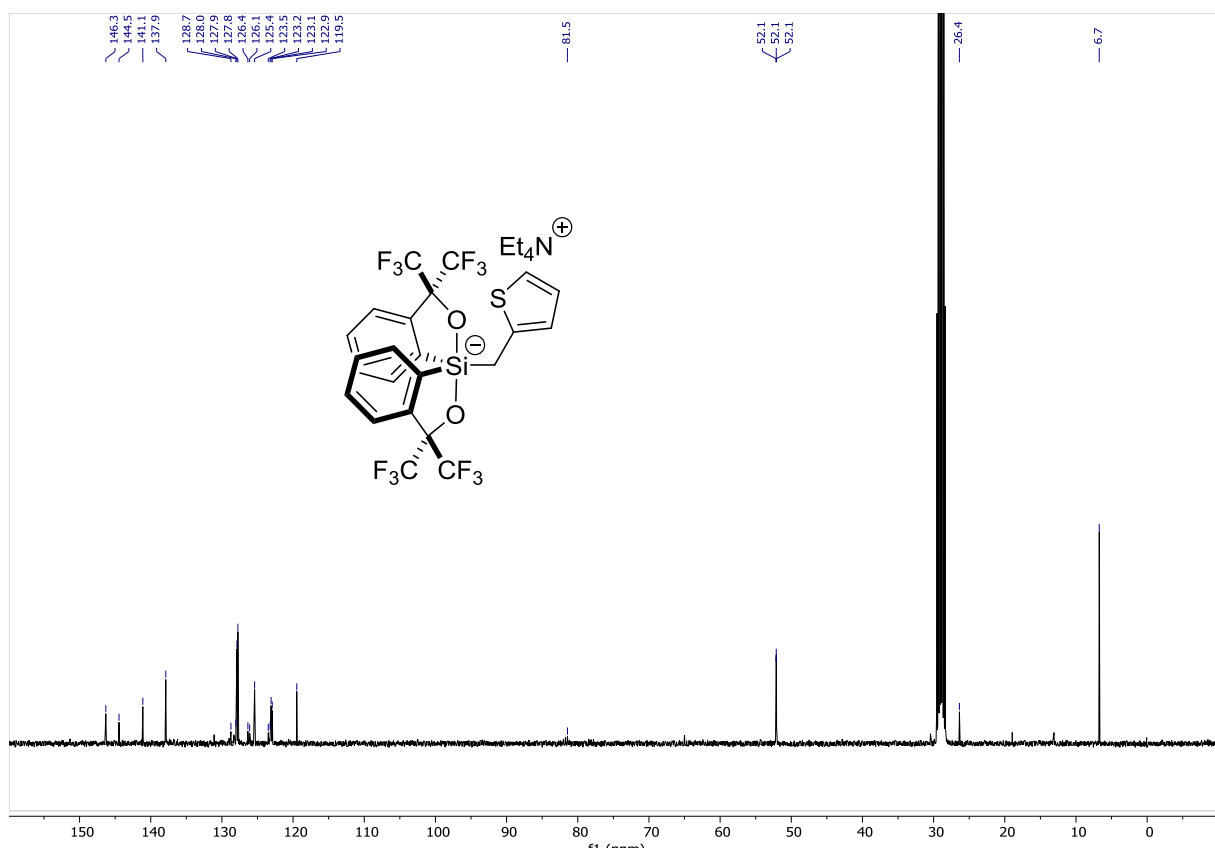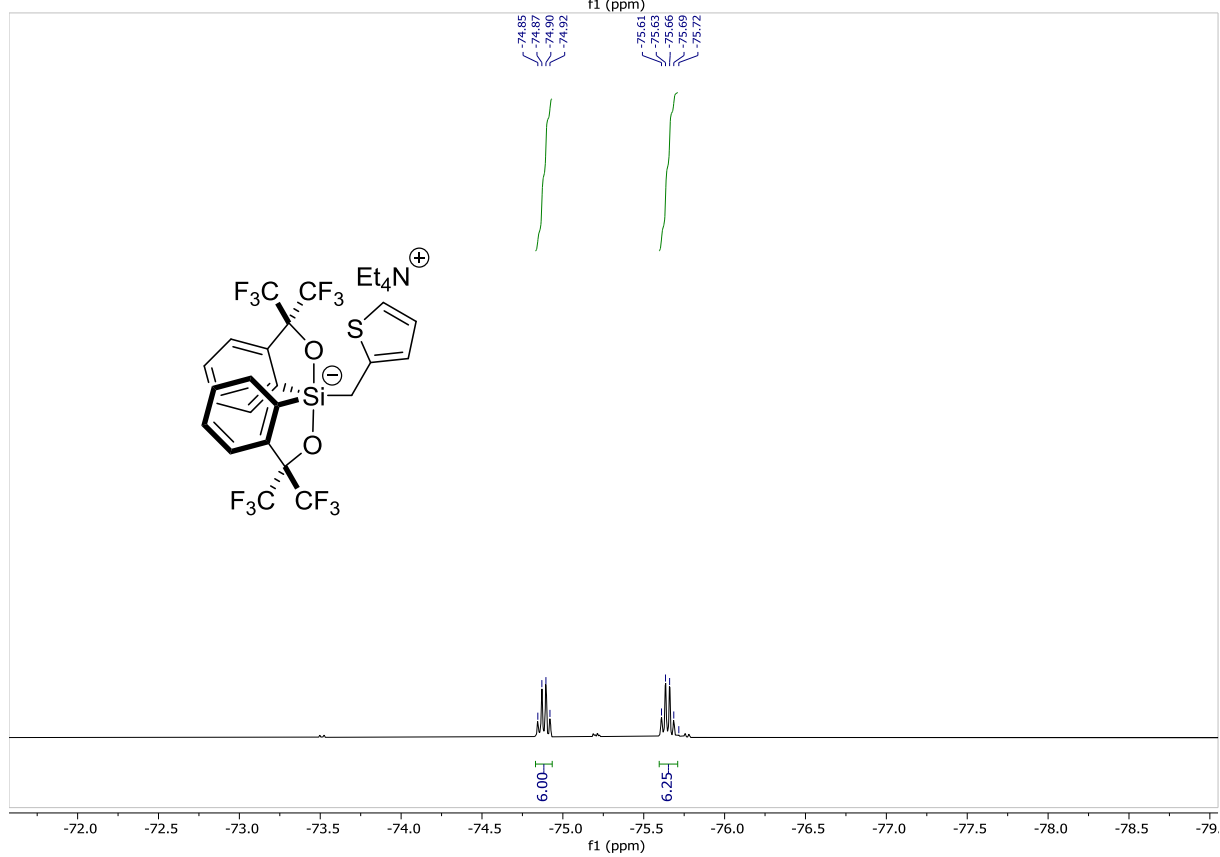

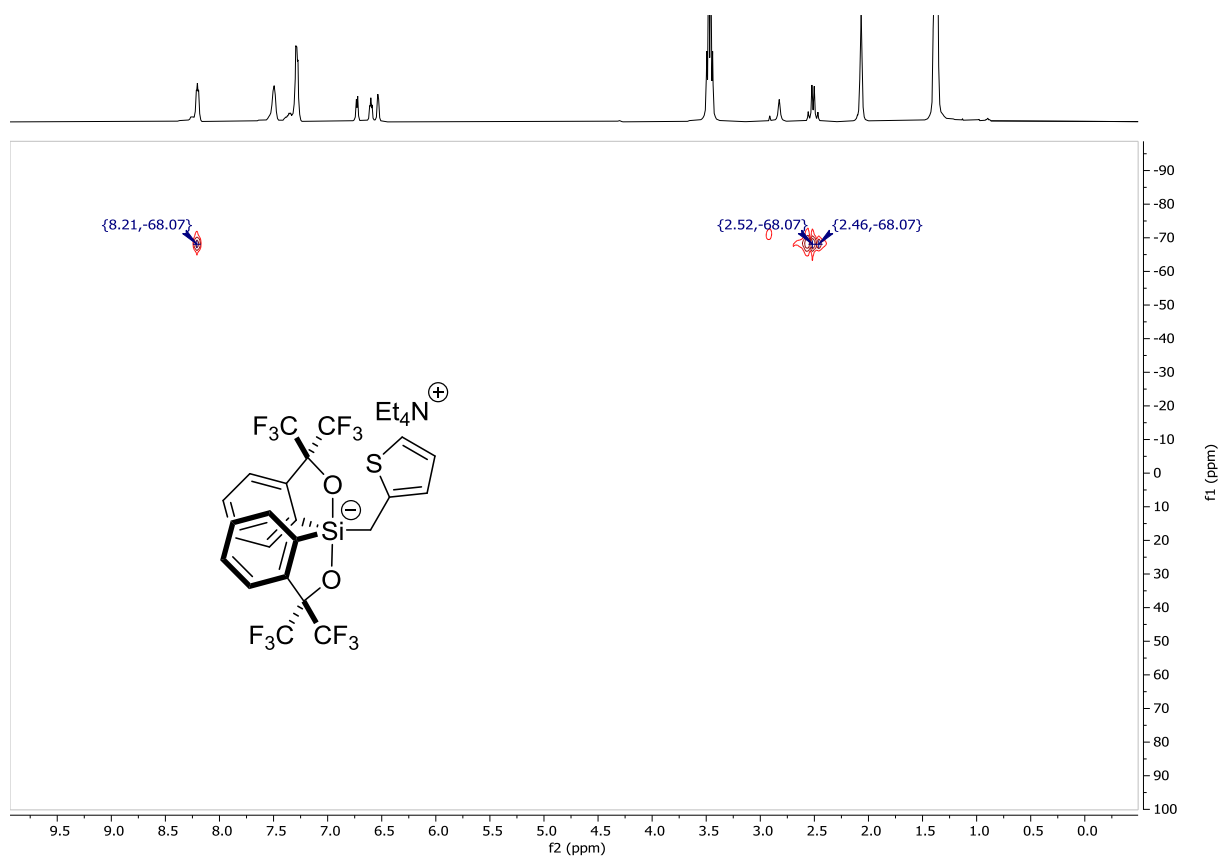

$^1\text{H}$ ,  $^{13}\text{C}$ ,  $^{19}\text{F}$ , and  $^1\text{H}/^{29}\text{Si}$  HMQC NMR spectra of 5 in  $\text{CDCl}_3$

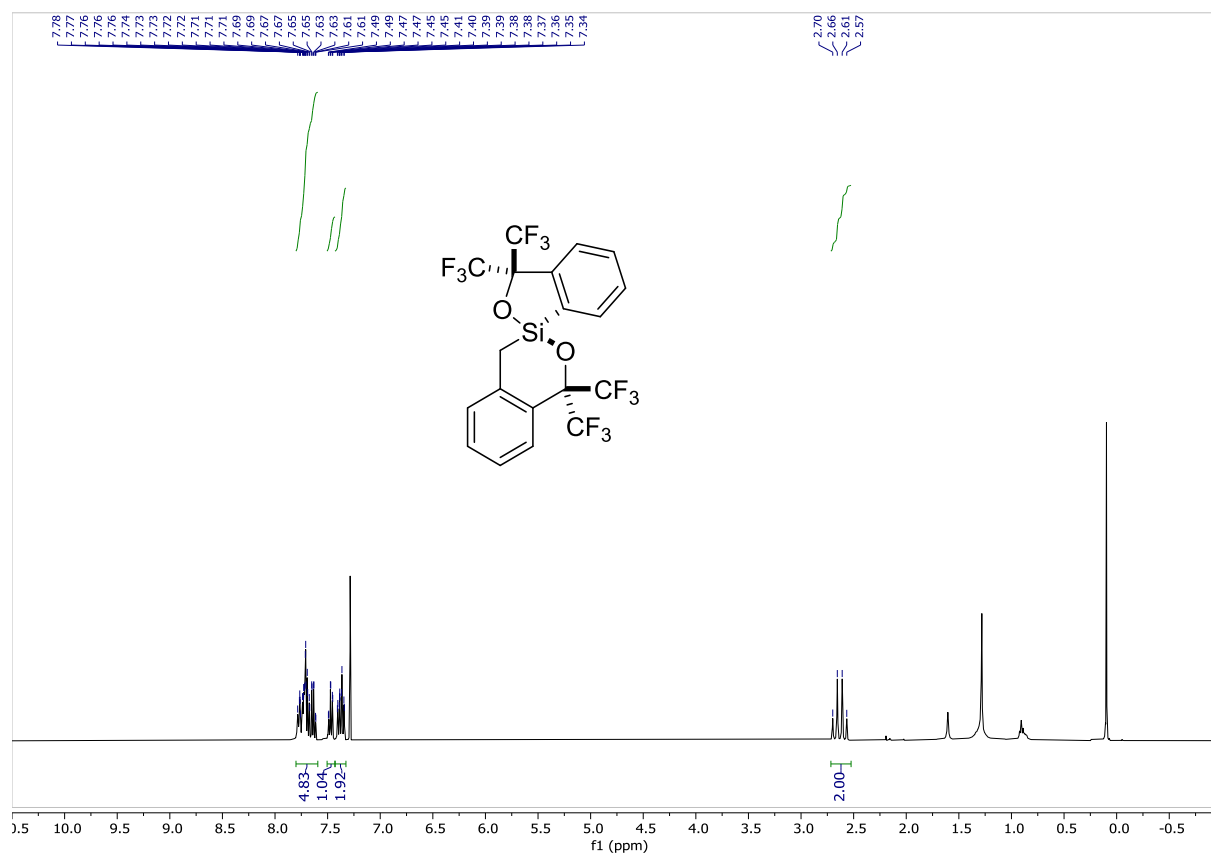

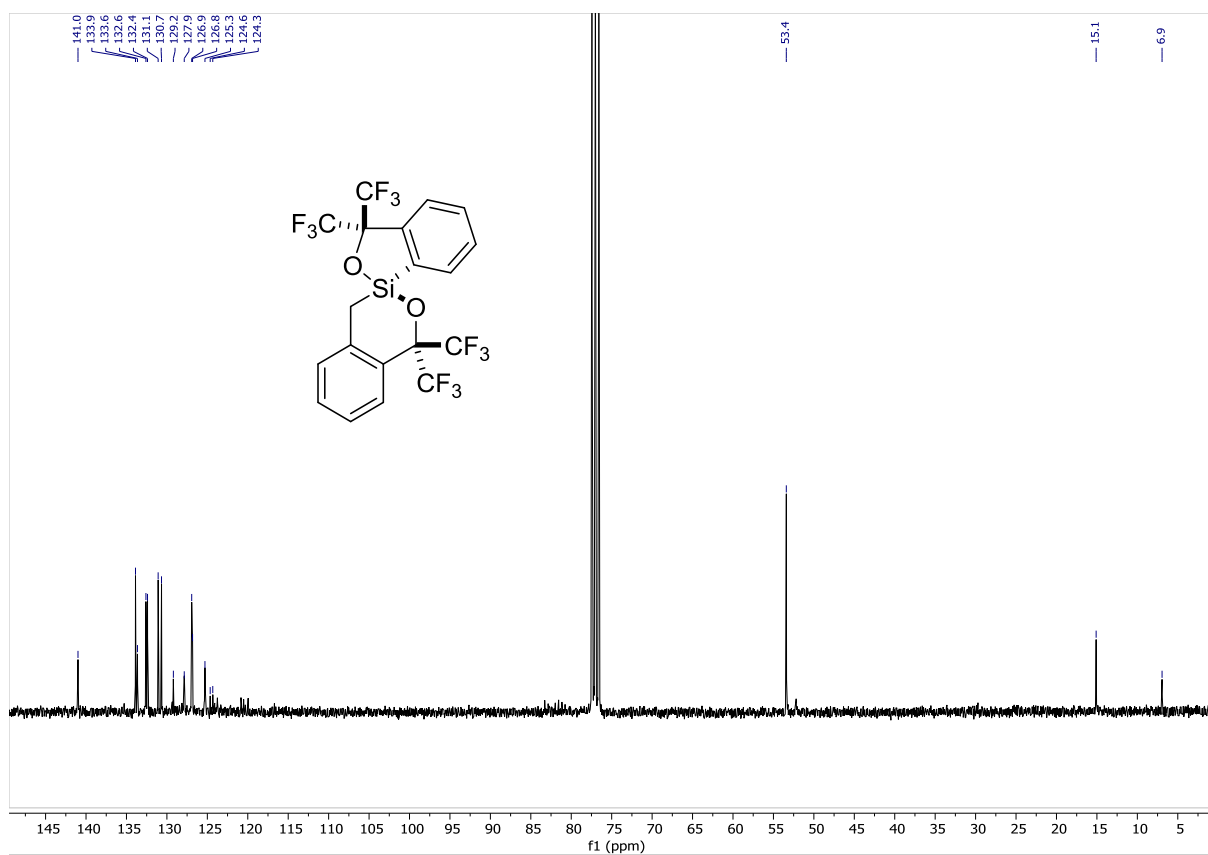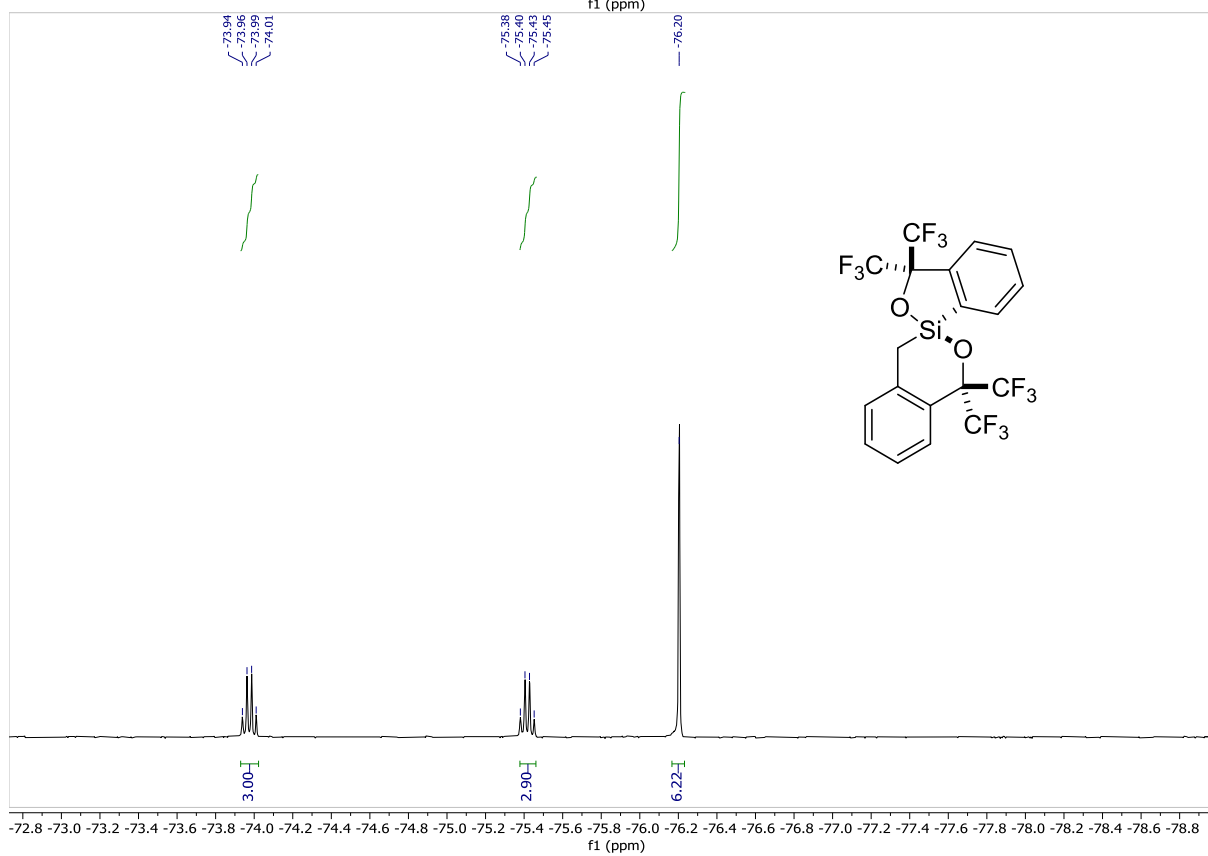

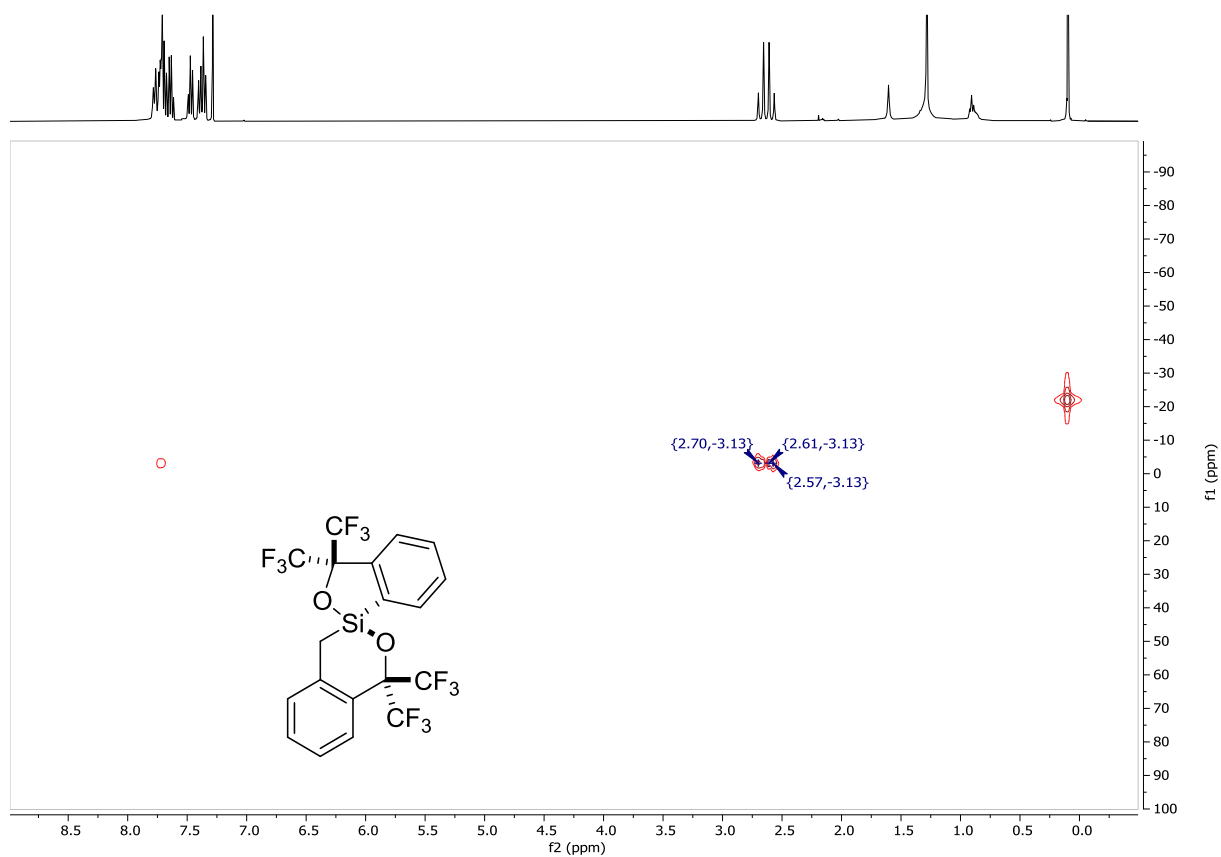

$^1\text{H}$ ,  $^{13}\text{C}$ ,  $^{19}\text{F}$ , and  $^1\text{H}/^{29}\text{Si}$  HMQC NMR spectra of 7 in  $\text{CD}_3\text{CN}$



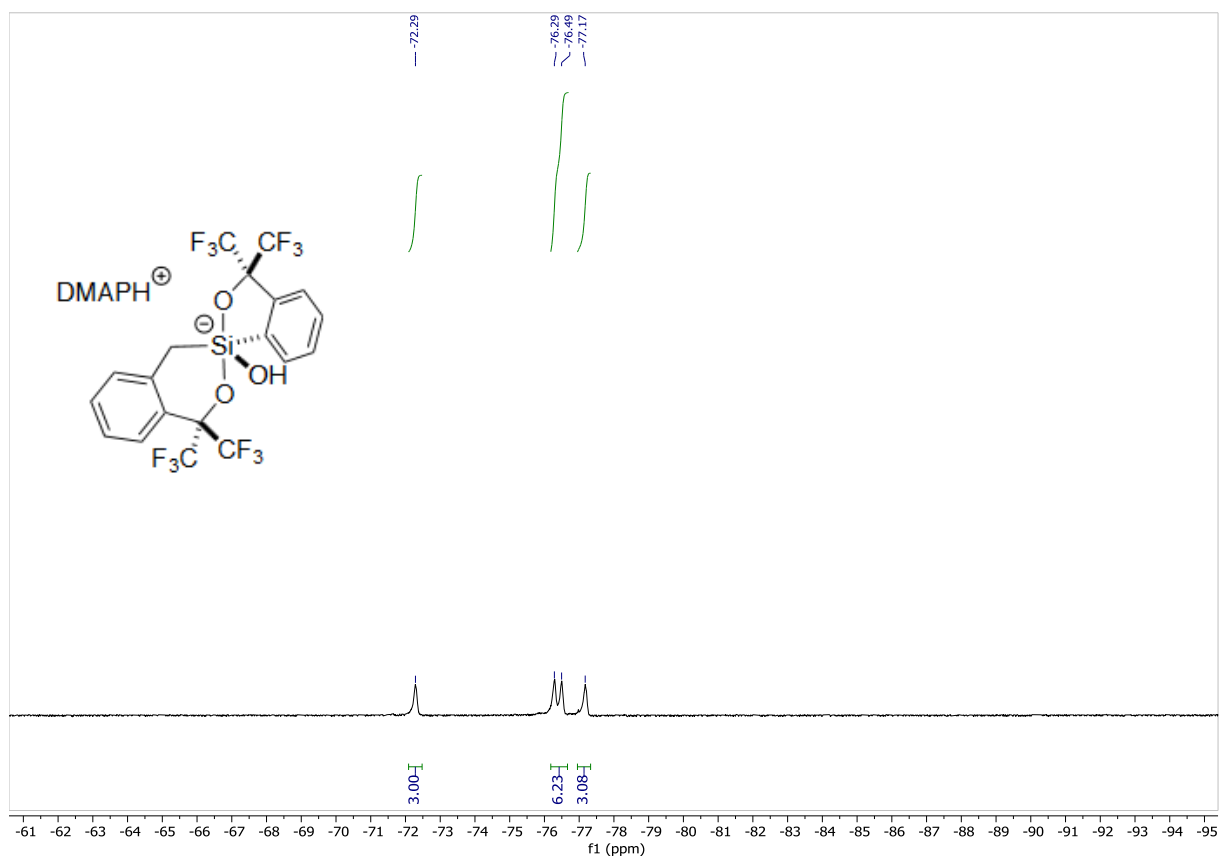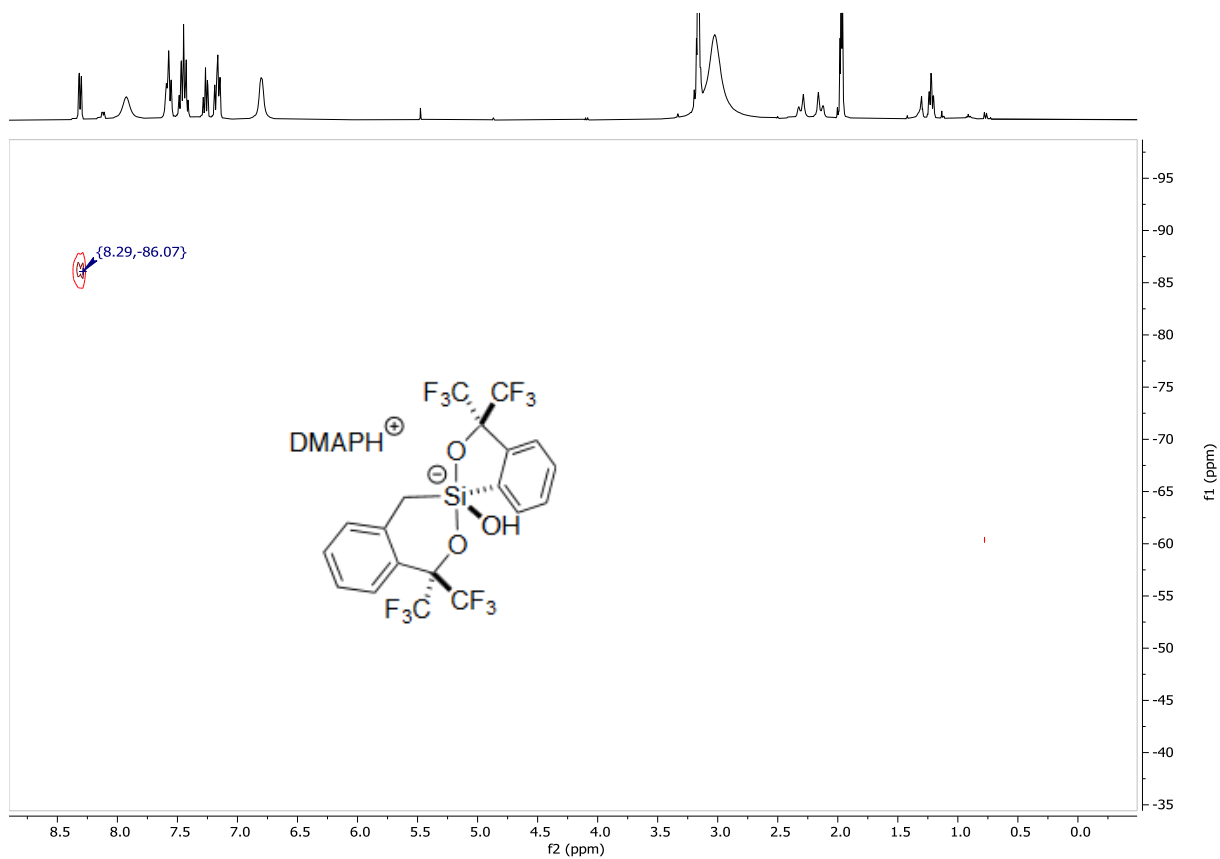

Chemical structure of the silanone ynone salt is shown above the spectrum. The structure consists of a central silicon atom double-bonded to an oxygen atom (silanone) and single-bonded to a phenyl ring, a hydroxyl group, and a ynone group. The ynone group is a 1,1,1-trifluoro-2-phenylethan-2-ylidene group. The counterion is  $\text{Et}_4\text{N}^+$ .

$^1\text{H}$  NMR spectrum (CDCl<sub>3</sub>) showing peaks from 0 to 10 ppm. The spectrum is characterized by several multiplets in the aromatic region (7.0-7.5 ppm), a sharp singlet at 3.5 ppm, a sharp singlet at 2.3 ppm, and a large multiplet in the aliphatic region (1.3-1.4 ppm). Integration values are provided below the peaks: 0.53, 1.69, 1.94, 2.49, 6.75, 0.80, 0.93, and 11.17. A list of chemical shifts (ppm) is provided at the top of the spectrum: 8.41, 8.40, 8.39, 8.38, 7.54, 7.53, 7.52, 7.50, 7.38, 7.37, 7.36, 7.35, 7.34, 7.33, 7.32, 7.31, 7.30, 7.23, 7.22, 7.11, 7.10, 7.09, 7.08, 7.07, 7.06, 7.05, 7.04, 7.03, 7.02, 7.01, 7.00, 6.99, 6.98, 6.97, 6.96, 6.95, 6.94, 6.93, 6.92, 6.91, 6.90, 6.89, 6.88, 6.87, 6.86, 6.85, 6.84, 6.83, 6.82, 6.81, 6.80, 6.79, 6.78, 6.77, 6.76, 6.75, 6.74, 6.73, 6.72, 6.71, 6.70, 6.69, 6.68, 6.67, 6.66, 6.65, 6.64, 6.63, 6.62, 6.61, 6.60, 6.59, 6.58, 6.57, 6.56, 6.55, 6.54, 6.53, 6.52, 6.51, 6.50, 6.49, 6.48, 6.47, 6.46, 6.45, 6.44, 6.43, 6.42, 6.41, 6.40, 6.39, 6.38, 6.37, 6.36, 6.35, 6.34, 6.33, 6.32, 6.31, 6.30, 6.29, 6.28, 6.27, 6.26, 6.25, 6.24, 6.23, 6.22, 6.21, 6.20, 6.19, 6.18, 6.17, 6.16, 6.15, 6.14, 6.13, 6.12, 6.11, 6.10, 6.09, 6.08, 6.07, 6.06, 6.05, 6.04, 6.03, 6.02, 6.01, 6.00, 5.99, 5.98, 5.97, 5.96, 5.95, 5.94, 5.93, 5.92, 5.91, 5.90, 5.89, 5.88, 5.87, 5.86, 5.85, 5.84, 5.83, 5.82, 5.81, 5.80, 5.79, 5.78, 5.77, 5.76, 5.75, 5.74, 5.73, 5.72, 5.71, 5.70, 5.69, 5.68, 5.67, 5.66, 5.65, 5.64, 5.63, 5.62, 5.61, 5.60, 5.59, 5.58, 5.57, 5.56, 5.55, 5.54, 5.53, 5.52, 5.51, 5.50, 5.49, 5.48, 5.47, 5.46, 5.45, 5.44, 5.43, 5.42, 5.41, 5.40, 5.39, 5.38, 5.37, 5.36, 5.35, 5.34, 5.33, 5.32, 5.31, 5.30, 5.29, 5.28, 5.27, 5.26, 5.25, 5.24, 5.23, 5.22, 5.21, 5.20, 5.19, 5.18, 5.17, 5.16, 5.15, 5.14, 5.13, 5.12, 5.11, 5.10, 5.09, 5.08, 5.07, 5.06, 5.05, 5.04, 5.03, 5.02, 5.01, 5.00, 4.99, 4.98, 4.97, 4.96, 4.95, 4.94, 4.93, 4.92, 4.91, 4.90, 4.89, 4.88, 4.87, 4.86, 4.85, 4.84, 4.83, 4.82, 4.81, 4.80, 4.79, 4.78, 4.77, 4.76, 4.75, 4.74, 4.73, 4.72, 4.71, 4.70, 4.69, 4.68, 4.67, 4.66, 4.65, 4.64, 4.63, 4.62, 4.61, 4.60, 4.59, 4.58, 4.57, 4.56, 4.55, 4.54, 4.53, 4.52, 4.51, 4.50, 4.49, 4.48, 4.47, 4.46, 4.45, 4.44, 4.43, 4.42, 4.41, 4.40, 4.39, 4.38, 4.37, 4.36, 4.35, 4.34, 4.33, 4.32, 4.31, 4.30, 4.29, 4.28, 4.27, 4.26, 4.25, 4.24, 4.23, 4.22, 4.21, 4.20, 4.19, 4.18, 4.17, 4.16, 4.15, 4.14, 4.13, 4.12, 4.11, 4.10, 4.09, 4.08, 4.07, 4.06, 4.05, 4.04, 4.03, 4.02, 4.01, 4.00, 3.99, 3.98, 3.97, 3.96, 3.95, 3.94, 3.93, 3.92, 3.91, 3.90, 3.89, 3.88, 3.87, 3.86, 3.85, 3.84, 3.83, 3.82, 3.81, 3.80, 3.79, 3.78, 3.77, 3.76, 3.75, 3.74, 3.73, 3.72, 3.71, 3.70, 3.69, 3.68, 3.67, 3.66, 3.65, 3.64, 3.63, 3.62, 3.61, 3.60, 3.59, 3.58, 3.57, 3.56, 3.55, 3.54, 3.53, 3.52, 3.51, 3.50, 3.49, 3.48, 3.47, 3.46, 3.45, 3.44, 3.43, 3.42, 3.41, 3.40, 3.39, 3.38, 3.37, 3.36, 3.35, 3.34, 3.33, 3.32, 3.31, 3.30, 3.29, 3.28, 3.27, 3.26, 3.25, 3.24, 3.23, 3.22, 3.21, 3.20, 3.19, 3.18, 3.17, 3.16, 3.15, 3.14, 3.13, 3.12, 3.11, 3.10, 3.09, 3.08, 3.07, 3.06, 3.05, 3.04, 3.03, 3.02, 3.01, 3.00, 2.99, 2.98, 2.97, 2.96, 2.95, 2.94, 2.93, 2.92, 2.91, 2.90, 2.89, 2.88, 2.87, 2.86, 2.85, 2.84, 2.83, 2.82, 2.81, 2.80, 2.79, 2.78, 2.77, 2.76, 2.75, 2.74, 2.73, 2.72, 2.71, 2.70, 2.69, 2.68, 2.67, 2.66, 2.65, 2.64, 2.63, 2.62, 2.61, 2.60, 2.59, 2.58, 2.57, 2.56, 2.55, 2.54, 2.53, 2.52, 2.51, 2.50, 2.49, 2.48, 2.47, 2.46, 2.45, 2.44, 2.43, 2.42, 2.41, 2.40, 2.39, 2.38, 2.37, 2.36, 2.35, 2.34, 2.33, 2.32, 2.31, 2.30, 2.29, 2.28, 2.27, 2.26, 2.25, 2.24, 2.23, 2.22, 2.21, 2.20, 2.19, 2.18, 2.17, 2.16, 2.15, 2.14, 2.13, 2.12, 2.11, 2.10, 2.09, 2.08, 2.07, 2.06, 2.05, 2.04, 2.03, 2.02, 2.01, 2.00, 1.99, 1.98, 1.97, 1.96, 1.95, 1.94, 1.93, 1.92, 1.91, 1.90, 1.89, 1.88, 1.87, 1.86, 1.85, 1.84, 1.83, 1.82, 1.81, 1.80, 1.79, 1.78, 1.77, 1.76, 1.75, 1.74, 1.73, 1.72, 1.71, 1.70, 1.69, 1.68, 1.67, 1.66, 1.65, 1.64, 1.63, 1.62, 1.61, 1.60, 1.59, 1.58, 1.57, 1.56, 1.55, 1.54, 1.53, 1.52, 1.51, 1.50, 1.49, 1.48, 1.47, 1.46, 1.45, 1.44, 1.43, 1.42, 1.41, 1.40, 1.39, 1.38, 1.37, 1.36, 1.35, 1.34, 1.33, 1.32, 1.31, 1.30, 1.29, 1.28, 1.27, 1.26, 1.25, 1.24



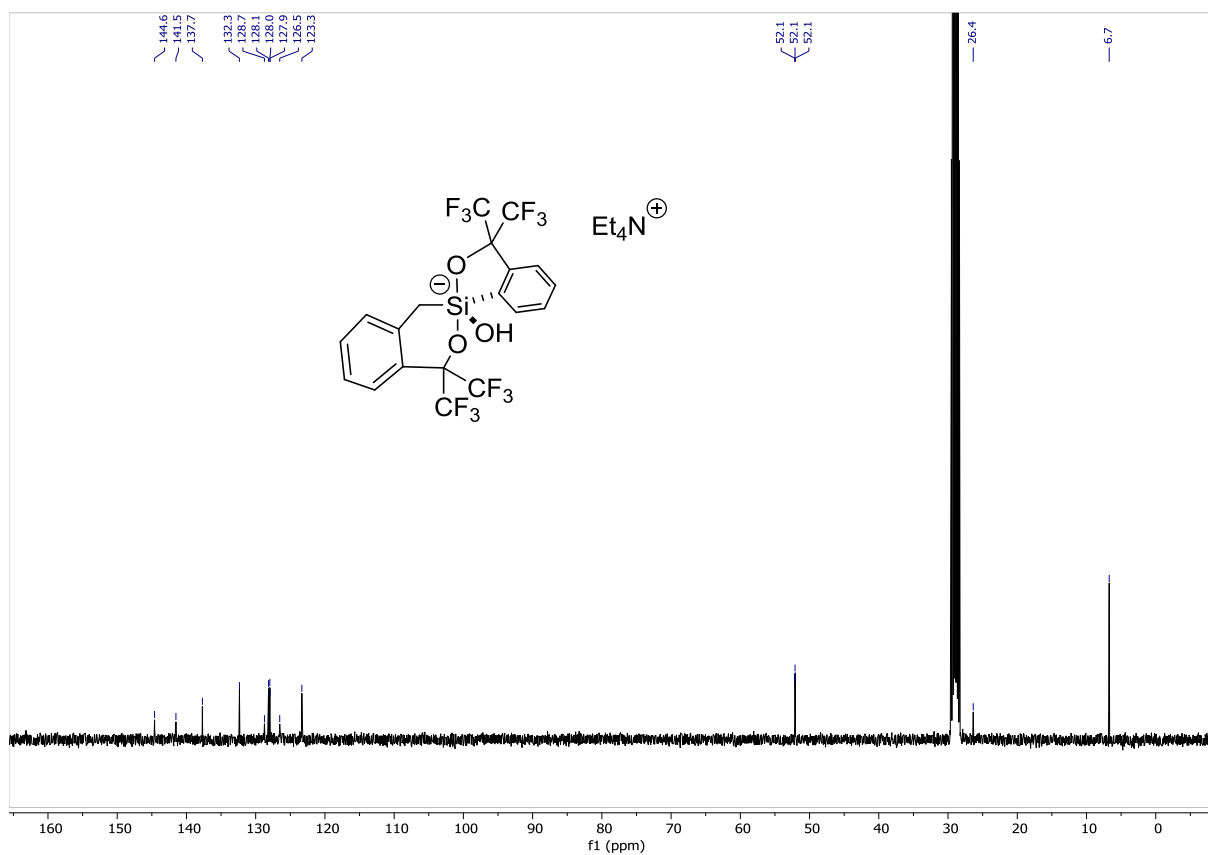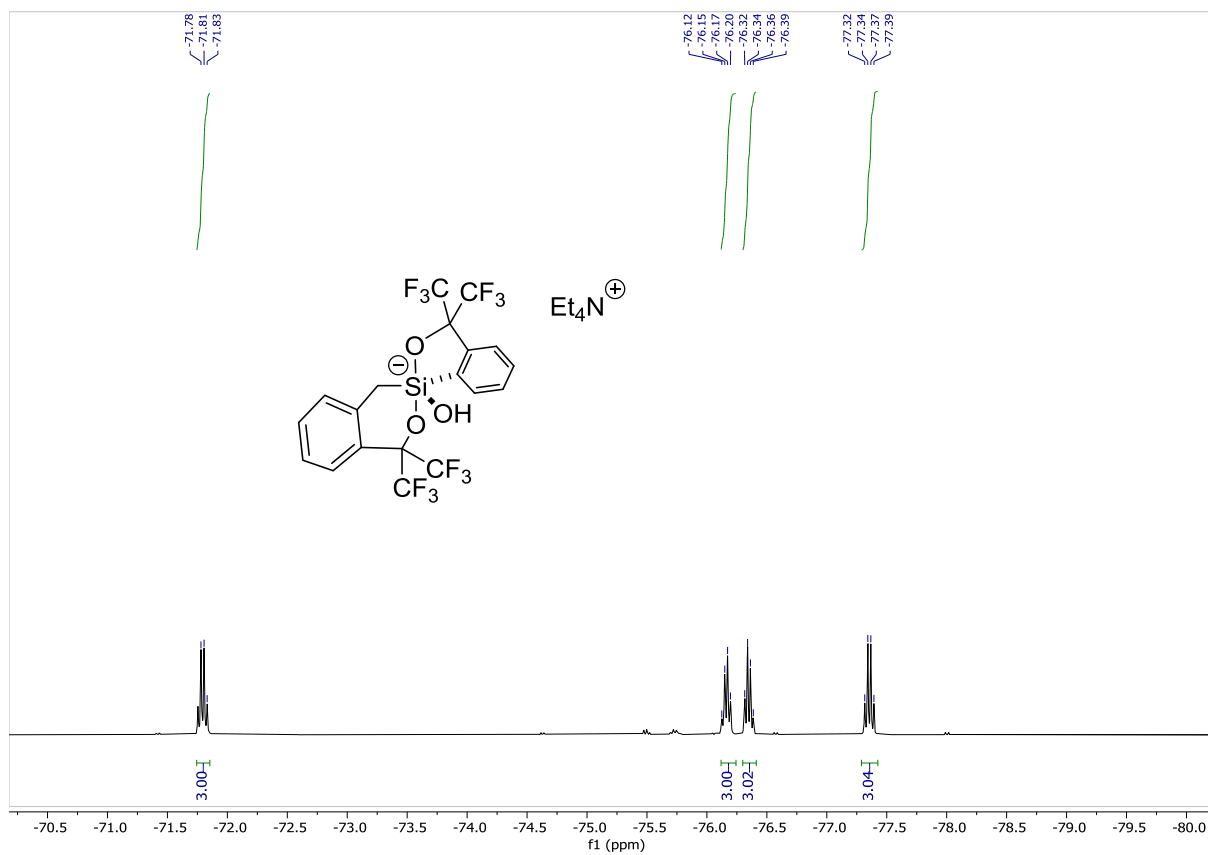

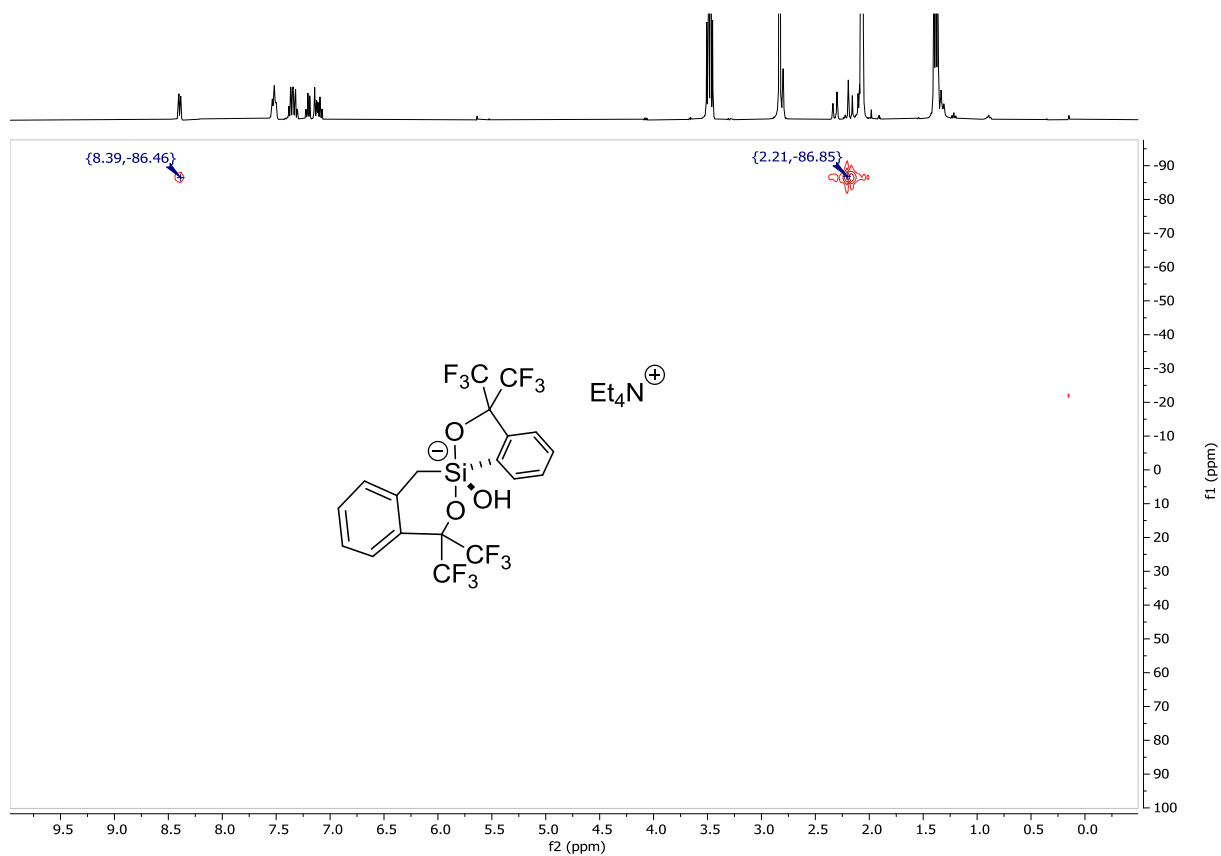

$^1\text{H}$ ,  $^{13}\text{C}$ ,  $^{19}\text{F}$ , NMR spectra of 8 in  $\text{CDCl}_3$  and  $^1\text{H}/^{29}\text{Si}$  HMQC spectrum of 8 in  $\text{CD}_3\text{CN}$

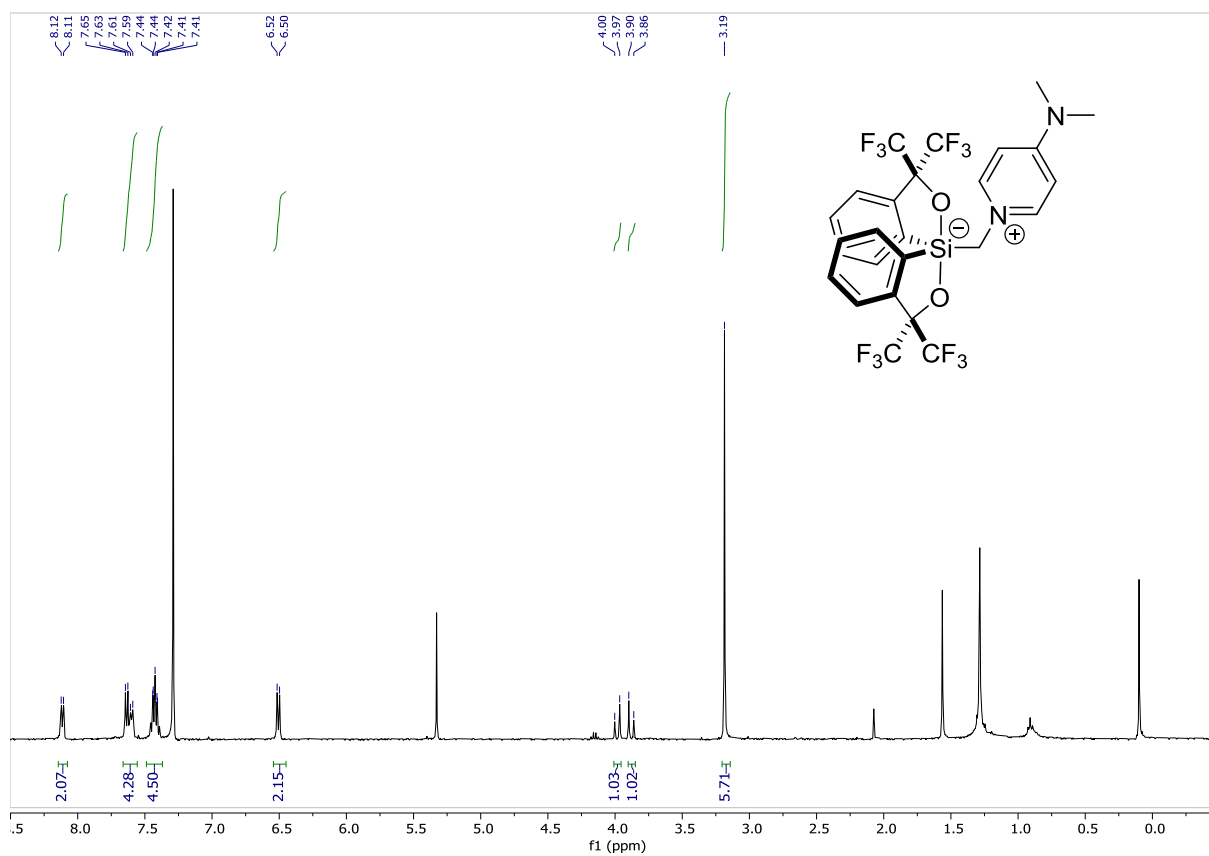

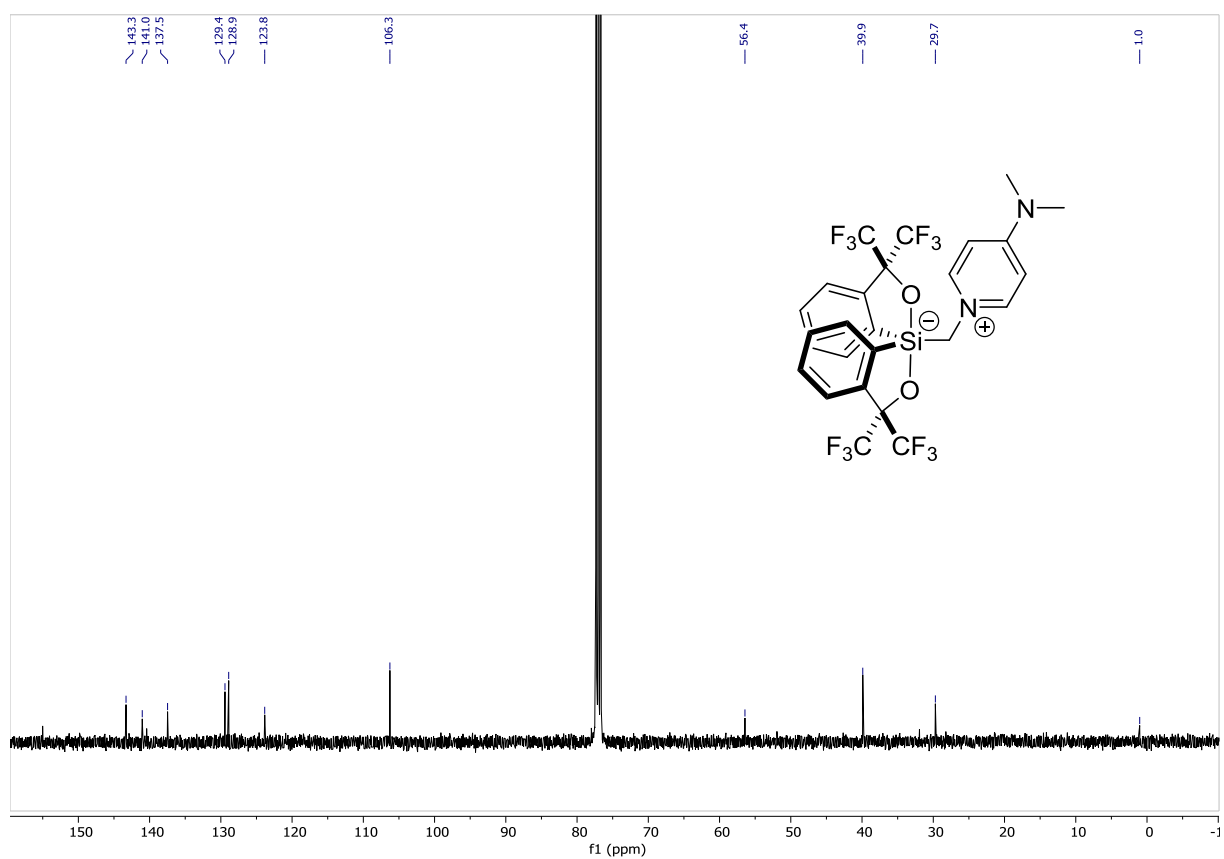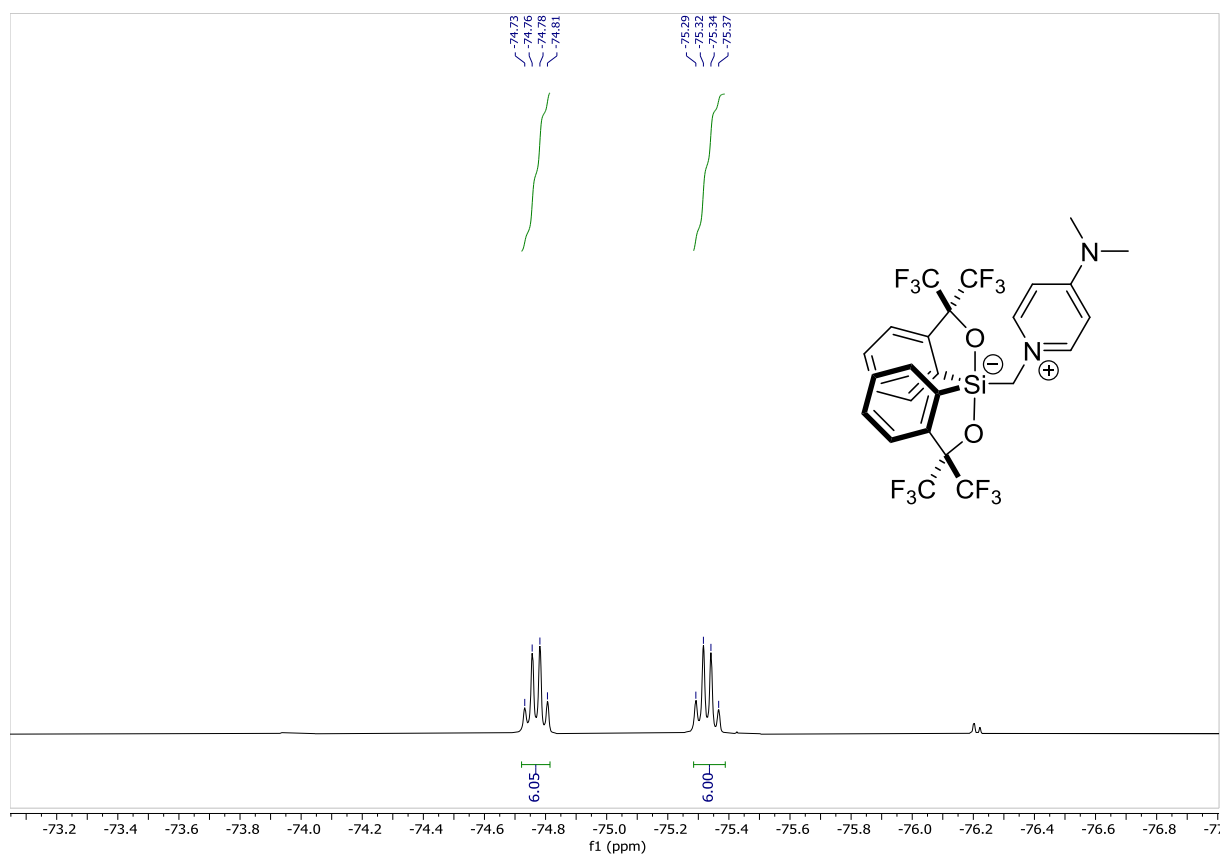

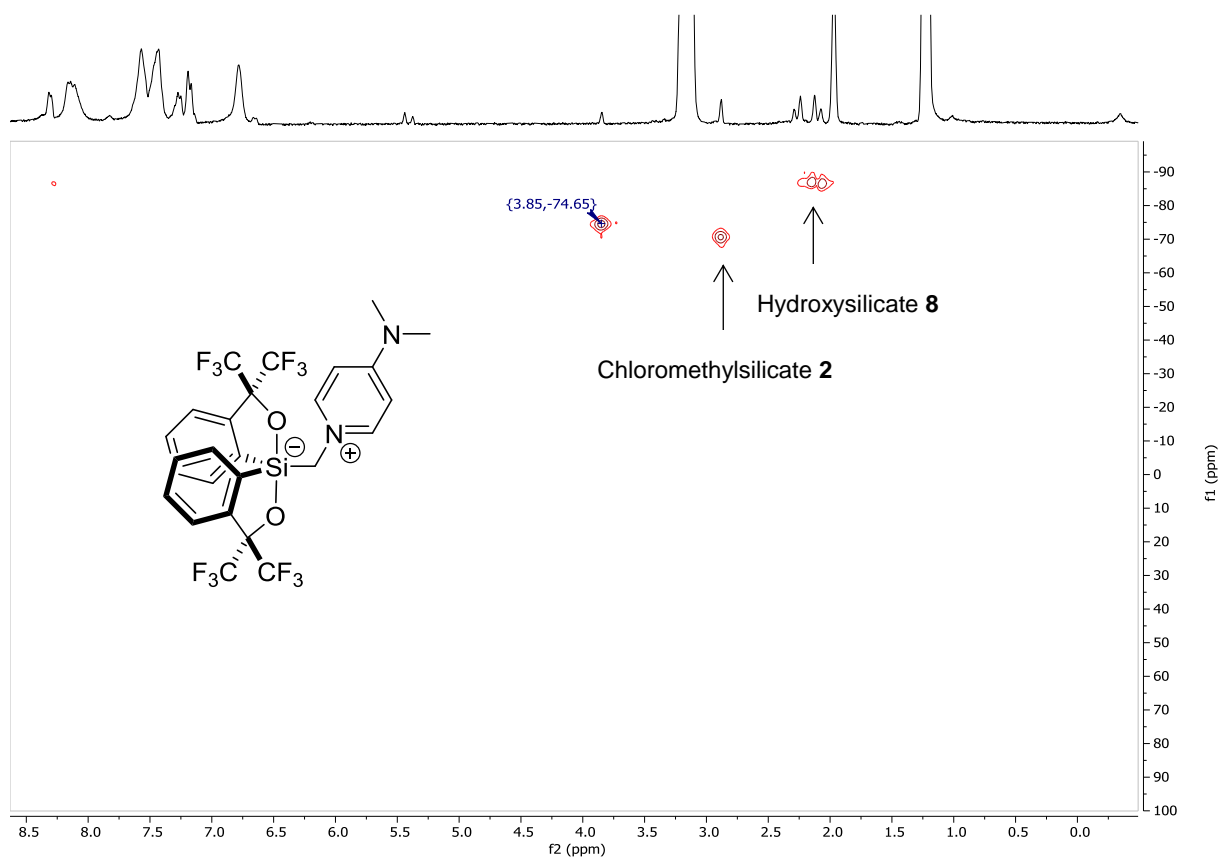

## IV. Computational details

All DFT computations were carried out using the Gaussian 09<sup>[2]</sup> software package.

Optimization of geometries and frequencies were performed using the B3LYP-D3 functional and the 6-311G(2d,p) basis set for all elements. The nature of all stationary points was confirmed by analyzing the harmonic vibrational frequencies.

In the following table is reported the energy (in Hartree) and the cartesian coordinates (x,y,z) of the computed species.

| A                            |             |             |             | TS <sub>A</sub> ‡                                  |             |             |             |
|------------------------------|-------------|-------------|-------------|----------------------------------------------------|-------------|-------------|-------------|
| E(B3LYP-D3) = -2829.28571261 |             |             |             | E(RB3LYP-D3) = -2829.23036311                      |             |             |             |
| N <sub>imag</sub> = 0        |             |             |             | N <sub>imag</sub> = 1 (- 480.07 cm <sup>-1</sup> ) |             |             |             |
| Si                           | 0.00392400  | -0.15835100 | -0.53838497 | Si                                                 | -0.09187700 | 0.66518199  | 0.33781800  |
| F                            | -2.25630593 | 2.06888199  | 1.46054304  | F                                                  | -1.58827901 | -2.47315907 | -0.28454700 |
| F                            | -4.31937981 | 1.40451503  | 1.34532106  | F                                                  | -3.72134495 | -2.29238200 | -0.63906401 |
| F                            | -3.46464109 | 2.58647895  | -0.25899601 | F                                                  | -2.95735502 | -2.34927106 | 1.38887596  |
| F                            | -4.91092014 | -0.62417102 | -0.35780901 | F                                                  | -4.89466476 | 0.07042000  | -0.07125700 |
| F                            | -4.14080191 | 0.58106798  | -1.98627806 | F                                                  | -4.06961918 | 0.07789000  | 1.93416905  |
| F                            | -3.31528711 | -1.38634801 | -1.61569798 | F                                                  | -3.63379312 | 1.71224105  | 0.58025002  |
| F                            | 3.46918011  | -1.63350904 | 1.77978802  | F                                                  | 2.67069411  | -2.07649708 | 2.23759890  |
| F                            | 4.31524515  | 0.36123100  | 1.85441005  | F                                                  | 4.39877415  | -1.07936001 | 1.39019895  |
| F                            | 2.25064611  | 0.03117100  | 2.43559289  | F                                                  | 2.89582992  | 0.06637400  | 2.45915103  |
| F                            | 3.34271789  | -0.22693200 | -2.17909408 | F                                                  | 1.77664900  | -1.62037206 | -1.82754695 |
| F                            | 4.13100100  | -1.75804901 | -0.86611003 | F                                                  | 1.82427895  | -3.01099300 | -0.16959800 |
| F                            | 4.92788696  | 0.25593501  | -0.77783602 | F                                                  | 3.67634511  | -2.23155499 | -0.96894902 |
| O                            | -1.61510396 | 0.66206700  | -0.86781901 | O                                                  | -1.49192095 | -0.03663200 | 1.01272702  |
| O                            | 1.62007201  | -0.92075598 | -0.10940800 | O                                                  | 0.94085598  | -0.63255900 | 0.64770001  |
| C                            | -0.90520298 | -1.06346798 | 0.85626298  | C                                                  | -0.90324903 | 0.71778703  | -1.35568798 |
| C                            | -0.38710701 | -1.99289095 | 1.76201499  | C                                                  | -0.45701900 | 1.17342806  | -2.59634089 |
| H                            | 0.65942299  | -2.26101208 | 1.70488095  | H                                                  | 0.52970803  | 1.60867703  | -2.68756509 |
| C                            | -1.20204604 | -2.56747603 | 2.73266792  | C                                                  | -1.26888001 | 1.06215405  | -3.71948099 |

|                              |             |             |             |                              |             |             |             |
|------------------------------|-------------|-------------|-------------|------------------------------|-------------|-------------|-------------|
| H                            | -0.79062200 | -3.28896689 | 3.42939091  | H                            | -0.91506201 | 1.41929901  | -4.68033695 |
| C                            | -2.54883194 | -2.21533394 | 2.81418705  | C                            | -2.53391504 | 0.48688501  | -3.61580396 |
| H                            | -3.18284988 | -2.66096306 | 3.57160211  | H                            | -3.16452289 | 0.40005001  | -4.49344778 |
| C                            | -3.08297491 | -1.28793001 | 1.92531395  | C                            | -2.99253011 | 0.01787500  | -2.39026403 |
| H                            | -4.12631989 | -1.01193202 | 1.99263597  | H                            | -3.97145796 | -0.43258700 | -2.30670404 |
| C                            | -2.25349402 | -0.72540700 | 0.95813799  | C                            | -2.17154002 | 0.13926800  | -1.27349496 |
| C                            | -2.68065596 | 0.31180200  | -0.08378900 | C                            | -2.52214909 | -0.33518299 | 0.14094301  |
| C                            | -3.19677305 | 1.60000205  | 0.61837298  | C                            | -2.70697403 | -1.87919700 | 0.15947001  |
| C                            | -3.78045702 | -0.27689701 | -1.01156700 | C                            | -3.79449797 | 0.38879201  | 0.66454703  |
| C                            | 0.91128701  | 1.50169098  | -0.39488900 | C                            | 1.87176502  | 1.66472602  | -0.34261501 |
| C                            | 0.39350599  | 2.78802299  | -0.56742698 | C                            | 2.24128294  | 2.83765888  | -1.00401497 |
| H                            | -0.65388000 | 2.90820789  | -0.81050903 | H                            | 1.56327796  | 3.68593693  | -1.01041496 |
| C                            | 1.20940495  | 3.90613389  | -0.42181301 | C                            | 3.46694493  | 2.95165610  | -1.65010798 |
| H                            | 0.79814500  | 4.89986086  | -0.55820698 | H                            | 3.73187900  | 3.87305307  | -2.15834093 |
| C                            | 2.55641603  | 3.75240993  | -0.09610000 | C                            | 4.36008406  | 1.88290501  | -1.63139403 |
| H                            | 3.19049311  | 4.62327719  | 0.02103300  | H                            | 5.32391691  | 1.96556997  | -2.12043095 |
| C                            | 3.09096909  | 2.48034096  | 0.08349000  | C                            | 4.01238680  | 0.70271301  | -0.98741603 |
| H                            | 4.13467884  | 2.36252689  | 0.34069300  | H                            | 4.70338821  | -0.12858599 | -0.98320299 |
| C                            | 2.26105499  | 1.37259805  | -0.06985600 | C                            | 2.76919293  | 0.59779298  | -0.35957301 |
| C                            | 2.68550801  | -0.08809800 | 0.10186700  | C                            | 2.27888894  | -0.69413298 | 0.30015799  |
| C                            | 3.19719601  | -0.33431000 | 1.55048704  | C                            | 3.06955409  | -0.95949203 | 1.61185503  |
| C                            | 3.79017591  | -0.45693901 | -0.92829698 | C                            | 2.39570093  | -1.90889096 | -0.66962600 |
| C                            | 0.03146700  | -0.95159698 | -2.28536391 | C                            | 0.48256001  | 2.14557791  | 1.18496597  |
| H                            | 0.96577799  | -0.73979700 | -2.80015993 | H                            | 0.30694300  | 3.12300301  | 0.77124500  |
| H                            | -0.81179601 | -0.65355802 | -2.90131497 | H                            | 1.23938203  | 2.07330203  | 1.94865894  |
| Cl                           | -0.06167800 | -2.79539108 | -2.20849609 | Cl                           | -0.99293298 | 2.91360092  | 2.95841599  |
| <b>B</b>                     |             |             |             | <b>C</b>                     |             |             |             |
| E(B3LYP-D3) = -2829.32130998 |             |             |             | E(B3LYP-D3) = -8177.91061921 |             |             |             |
| N <sub>imag</sub> = 0        |             |             |             | N <sub>imag</sub> = 0        |             |             |             |
| Si                           | 0.17184500  | 0.51182997  | 0.49798000  | Si                           | -0.83663702 | 0.24887000  | -0.57611603 |
| F                            | 2.16070199  | -0.82968497 | -2.26371098 | F                            | -3.84964204 | 1.63904798  | 0.96819699  |

|   |             |             |             |   |             |             |             |
|---|-------------|-------------|-------------|---|-------------|-------------|-------------|
| F | 4.29034424  | -0.70401597 | -1.86011195 | F | -5.47745705 | 0.20154400  | 0.94044799  |
| F | 3.21918201  | 1.02674699  | -2.60561991 | F | -5.03522301 | 1.38430095  | -0.82324600 |
| F | 5.08162785  | 0.74986500  | 0.29660800  | F | -5.11330986 | -2.10448003 | -0.46335000 |
| F | 3.98757505  | 2.46694708  | -0.44815800 | F | -4.72816896 | -0.91310602 | -2.23206902 |
| F | 3.54266000  | 1.67595005  | 1.51619101  | F | -3.24486995 | -2.33337808 | -1.54639804 |
| F | -1.98506498 | -2.07203007 | -2.17789602 | F | 2.28286004  | 0.67971998  | 2.58458209  |
| F | -3.73411298 | -0.79756200 | -2.31234908 | F | 1.92160904  | 2.81943393  | 2.54068995  |
| F | -1.75274706 | 0.04564700  | -2.55954099 | F | 0.25624499  | 1.44057405  | 2.48170304  |
| F | -3.14507890 | -1.40495396 | 1.76127994  | F | 2.98156595  | 2.02267098  | -1.35300100 |
| F | -2.29708195 | -2.85232496 | 0.39956000  | F | 3.77221203  | 0.78181398  | 0.24919200  |
| F | -4.26563311 | -2.06329489 | 0.01685200  | F | 3.57567596  | 2.92264104  | 0.52027702  |
| O | 1.58916295  | 1.10112798  | -0.37727600 | O | -2.53550100 | 0.28589699  | -1.08401406 |
| O | -1.02641201 | -0.65645999 | 0.02449800  | O | 1.15432894  | 0.31690100  | 0.06177900  |
| C | 1.29680002  | -0.94303399 | 1.05012703  | C | -1.35835099 | -0.75831598 | 0.92422301  |
| C | 0.97363001  | -2.03277206 | 1.86026704  | C | -0.58978200 | -1.33734703 | 1.93341506  |
| H | -0.03332300 | -2.12879300 | 2.24893689  | H | 0.48287001  | -1.21133494 | 1.94750702  |
| C | 1.93217599  | -2.98966098 | 2.16625404  | C | -1.19164300 | -2.10454702 | 2.92243195  |
| H | 1.67420006  | -3.83486390 | 2.79606295  | H | -0.57784802 | -2.56176591 | 3.68951988  |
| C | 3.23077893  | -2.87226605 | 1.66420400  | C | -2.57202697 | -2.29252100 | 2.92237091  |
| H | 3.97655106  | -3.62201500 | 1.90471697  | H | -3.04001307 | -2.88671088 | 3.69917703  |
| C | 3.56917500  | -1.79680705 | 0.85357302  | C | -3.35525799 | -1.73182201 | 1.92008698  |
| H | 4.57121277  | -1.70178604 | 0.45730299  | H | -4.42522621 | -1.88634706 | 1.91131794  |
| C | 2.58971596  | -0.84838998 | 0.56053001  | C | -2.73675799 | -0.98068899 | 0.92472100  |
| C | 2.77067900  | 0.38699901  | -0.32051700 | C | -3.45029998 | -0.34616199 | -0.26960400 |
| C | 3.11979389  | -0.02741200 | -1.77515602 | C | -4.47099304 | 0.72461200  | 0.20498800  |
| C | 3.85626507  | 1.32979000  | 0.26010701  | C | -4.15165520 | -1.43174505 | -1.13317502 |
| C | -2.25369501 | 1.96201301  | 0.00732400  | C | -0.59554201 | 2.11547589  | -0.61644101 |
| C | -2.88431001 | 3.16275096  | 0.35583299  | C | -1.54318702 | 3.01095700  | -1.12318397 |
| H | -2.27651000 | 4.05805302  | 0.42144200  | H | -2.46540594 | 2.62562490  | -1.53665805 |
| C | -4.24423790 | 3.23285389  | 0.61183202  | C | -1.31482100 | 4.38114882  | -1.08707297 |
| H | -4.69881487 | 4.18069983  | 0.87897700  | H | -2.05433297 | 5.06368780  | -1.49050105 |
| C | -5.01824522 | 2.08177900  | 0.51916897  | C | -0.14359000 | 4.87768221  | -0.52171701 |

|                                                                                                              |             |             |             |                                                                   |             |             |             |
|--------------------------------------------------------------------------------------------------------------|-------------|-------------|-------------|-------------------------------------------------------------------|-------------|-------------|-------------|
| H                                                                                                            | -6.08586788 | 2.11590195  | 0.70285797  | H                                                                 | 0.03367000  | 5.94640923  | -0.48317200 |
| C                                                                                                            | -4.41150379 | 0.87506199  | 0.20097201  | C                                                                 | 0.80211198  | 4.00471020  | 0.00169000  |
| H                                                                                                            | -5.02716208 | -0.00917200 | 0.14269701  | H                                                                 | 1.70409203  | 4.39314890  | 0.45320001  |
| C                                                                                                            | -3.03655791 | 0.79475200  | -0.03510300 | C                                                                 | 0.57282400  | 2.63263106  | -0.06263100 |
| C                                                                                                            | -2.35778308 | -0.55439597 | -0.33137101 | C                                                                 | 1.53792298  | 1.58570302  | 0.48343599  |
| C                                                                                                            | -2.46213794 | -0.85640502 | -1.85910201 | C                                                                 | 1.51060200  | 1.63103294  | 2.04444599  |
| C                                                                                                            | -3.02635598 | -1.73093104 | 0.46417001  | C                                                                 | 2.97976494  | 1.84999704  | -0.03189800 |
| C                                                                                                            | -0.79300600 | 1.95380497  | -0.30727100 | C                                                                 | -0.20978600 | -0.77837199 | -2.05628395 |
| H                                                                                                            | -0.33536300 | 2.90469193  | -0.03509800 | H                                                                 | 0.65761203  | -0.37387300 | -2.57576990 |
| H                                                                                                            | -0.64706397 | 1.82154298  | -1.38292003 | H                                                                 | -1.00690901 | -1.00574696 | -2.75780797 |
| Cl                                                                                                           | -0.15741500 | 1.22555900  | 2.56338692  | Cl                                                                | 0.34997499  | -2.42057705 | -1.41382694 |
|                                                                                                              |             |             |             | Mg                                                                | 2.43017197  | -1.24285698 | -0.36106101 |
|                                                                                                              |             |             |             | Br                                                                | 3.00629997  | -2.66822290 | 1.52285099  |
|                                                                                                              |             |             |             | Br                                                                | 3.60527992  | -1.12789798 | -2.51664090 |
| <b>T<sub>000</sub></b><br>E(B3LYP-D3) = -8177.86039854<br>N <sub>imag</sub> = 1 (- 407.47 cm <sup>-1</sup> ) |             |             |             | <b>D</b><br>E(B3LYP-D3) = -8177.93989166<br>N <sub>imag</sub> = 0 |             |             |             |
| Si                                                                                                           | 0.61682600  | 0.39350700  | 0.76983601  | Si                                                                | 0.88539600  | 1.08174300  | 0.36461499  |
| F                                                                                                            | -0.60569602 | 1.07691300  | -2.53246808 | F                                                                 | -1.65131903 | 1.09405005  | -2.35750890 |
| F                                                                                                            | -2.21992612 | 2.52735209  | -2.52512693 | F                                                                 | -3.36859488 | 2.21134901  | -1.63648403 |
| F                                                                                                            | -2.62762904 | 0.44408500  | -2.07433510 | F                                                                 | -3.10314202 | 0.14157800  | -1.05607796 |
| F                                                                                                            | -3.19385600 | 3.31309295  | -0.14822100 | F                                                                 | -3.36601901 | 2.98279190  | 0.97540897  |
| F                                                                                                            | -3.68399405 | 1.26273406  | 0.34654200  | F                                                                 | -3.14754605 | 0.90420598  | 1.55354702  |
| F                                                                                                            | -2.38320303 | 2.40214396  | 1.64729202  | F                                                                 | -1.67736399 | 2.36124706  | 2.19397902  |
| F                                                                                                            | 2.13306689  | -2.71144605 | -1.86673796 | F                                                                 | 2.65298510  | -1.21065998 | -2.60306311 |
| F                                                                                                            | 4.13212013  | -2.58503890 | -1.03825700 | F                                                                 | 4.48534489  | -1.87440705 | -1.67656803 |
| F                                                                                                            | 2.44453096  | -2.96658802 | 0.26661399  | F                                                                 | 2.57555199  | -2.62705302 | -0.96719098 |
| F                                                                                                            | 3.01458001  | 1.38133705  | -1.53245294 | F                                                                 | 3.87469697  | 1.84534097  | -0.01349900 |
| F                                                                                                            | 2.49931002  | -0.21564700 | -2.90175104 | F                                                                 | 3.97957897  | 1.15225196  | -2.06436110 |
| F                                                                                                            | 4.48204994  | -0.13239600 | -2.03633308 | F                                                                 | 5.37594700  | 0.39389199  | -0.59100002 |
| O                                                                                                            | -1.05101204 | 0.44118199  | 0.14397199  | O                                                                 | -0.74116403 | 0.66692603  | 0.24835500  |



|    |             |             |             |    |             |             |             |
|----|-------------|-------------|-------------|----|-------------|-------------|-------------|
| O  | 1.28601205  | -0.49249899 | -0.49019301 | O  | 1.80442500  | 0.16968299  | -0.64842999 |
| C  | 0.74993700  | 2.24159503  | 0.52861398  | C  | 0.58470702  | 2.80796504  | -0.25799799 |
| C  | 1.79376996  | 3.12103009  | 0.81706297  | C  | 1.44105899  | 3.87604308  | -0.52883798 |
| H  | 2.65770197  | 2.77171111  | 1.36729503  | H  | 2.51084399  | 3.76067996  | -0.41256300 |
| C  | 1.74113297  | 4.43875122  | 0.38091001  | C  | 0.92101002  | 5.09077406  | -0.95817101 |
| H  | 2.55453897  | 5.11778688  | 0.60988599  | H  | 1.58645594  | 5.91872692  | -1.17411995 |
| C  | 0.65371001  | 4.88454103  | -0.36759999 | C  | -0.45552099 | 5.24837399  | -1.11499703 |
| H  | 0.62053603  | 5.90873814  | -0.72061002 | H  | -0.85640597 | 6.19791985  | -1.44989502 |
| C  | -0.39327499 | 4.02197218  | -0.66701198 | C  | -1.32223105 | 4.19592905  | -0.84739500 |
| H  | -1.23889399 | 4.36819601  | -1.24320495 | H  | -2.38846707 | 4.31973410  | -0.96874303 |
| C  | -0.33642000 | 2.70968390  | -0.20606700 | C  | -0.78906399 | 2.98183203  | -0.42383400 |
| C  | -1.44183505 | 1.67520499  | -0.40322599 | C  | -1.60244298 | 1.73313200  | -0.08426100 |
| C  | -1.73717999 | 1.42599702  | -1.90573800 | C  | -2.44997406 | 1.27350998  | -1.30048895 |
| C  | -2.70345592 | 2.16371393  | 0.36591700  | C  | -2.47842908 | 1.98567104  | 1.17352104  |
| C  | 2.51470208  | 0.11053700  | 1.74380100  | C  | 2.70548606  | -0.18576799 | 2.13305402  |
| C  | 3.09841704  | 0.57750702  | 2.92298293  | C  | 3.01433301  | -0.62933302 | 3.42241311  |
| H  | 2.47447395  | 0.95811802  | 3.72489190  | H  | 2.48079491  | -0.18953300 | 4.25659609  |
| C  | 4.47849607  | 0.57179302  | 3.09300494  | C  | 3.94825101  | -1.62261105 | 3.65308809  |
| H  | 4.91416693  | 0.93792099  | 4.01616383  | H  | 4.15202093  | -1.95191598 | 4.66525412  |
| C  | 5.29847479  | 0.08902300  | 2.07696009  | C  | 4.60581589  | -2.20226598 | 2.57481694  |
| H  | 6.37459803  | 0.07527000  | 2.20446897  | H  | 5.33804083  | -2.98552608 | 2.72936296  |
| C  | 4.74009085  | -0.36790201 | 0.88958597  | C  | 4.30835819  | -1.78621495 | 1.28840005  |
| H  | 5.37924385  | -0.72524297 | 0.09490400  | H  | 4.82688999  | -2.25353408 | 0.46631899  |
| C  | 3.35514903  | -0.35088399 | 0.72872901  | C  | 3.35542488  | -0.79001701 | 1.04572105  |
| C  | 2.64695811  | -0.75560600 | -0.56413001 | C  | 3.07667208  | -0.35856199 | -0.40313599 |
| C  | 2.82529092  | -2.28120589 | -0.81467599 | C  | 3.18707800  | -1.54343295 | -1.42877698 |
| C  | 3.17001390  | 0.06724700  | -1.78092098 | C  | 4.10110378  | 0.75460899  | -0.79093701 |
| C  | 0.45587200  | -0.52257299 | 2.32156110  | C  | 1.69232702  | 0.93597102  | 2.02115202  |
| H  | 0.55714399  | -0.02379300 | 3.27168012  | H  | 2.18908811  | 1.89298606  | 2.22143602  |
| H  | 0.65662098  | -1.58720696 | 2.31592202  | H  | 0.92196602  | 0.80441397  | 2.78212404  |
| Cl | -1.85665298 | -0.89545703 | 2.95967603  | Cl | -0.07364000 | -1.90419698 | 2.26703811  |
| Mg | -2.36795592 | -1.43615401 | 0.68897098  | Mg | -1.59519100 | -2.09191108 | 0.56842101  |

|                                                                 |             |             |             |                                                                                                            |             |             |             |
|-----------------------------------------------------------------|-------------|-------------|-------------|------------------------------------------------------------------------------------------------------------|-------------|-------------|-------------|
| Br                                                              | -4.73013496 | -1.73557699 | 0.14958400  | Br                                                                                                         | -3.92907310 | -2.47486591 | 1.17945600  |
| Br                                                              | -0.84726202 | -3.21346307 | 0.01139300  | Br                                                                                                         | -0.80622900 | -2.51796699 | -1.69474804 |
| <b>E</b><br>E(B3LYP-D3) = -2751.371693<br>$N_{\text{imag}} = 0$ |             |             |             | <b>T<sub>SE</sub></b><br>E(B3LYP-D3) = -2751.29882958<br>$N_{\text{imag}} = 1$ (- 533.0 cm <sup>-1</sup> ) |             |             |             |
| F                                                               | -1.64788306 | -2.18193507 | -2.61845899 | F                                                                                                          | -1.41407394 | -2.08959603 | -2.81126308 |
| F                                                               | -3.74023104 | -1.66302800 | -2.35488391 | F                                                                                                          | -3.40464091 | -2.54165792 | -2.07536006 |
| F                                                               | -2.23095393 | -0.11779600 | -2.35384297 | F                                                                                                          | -2.66212392 | -0.51197100 | -2.02083611 |
| F                                                               | -2.67874193 | -3.08262610 | 1.37007594  | F                                                                                                          | -0.97654802 | -3.81010604 | 0.99933100  |
| F                                                               | -2.16286802 | -3.90998006 | -0.56176800 | F                                                                                                          | -0.88635498 | -4.17571306 | -1.13065100 |
| F                                                               | -4.14446783 | -3.10347795 | -0.21565400 | F                                                                                                          | -2.79811597 | -4.17466307 | -0.10395900 |
| O                                                               | -0.96333802 | -1.47587800 | -0.09445800 | O                                                                                                          | -0.42399099 | -1.52126396 | -0.38568300 |
| C                                                               | -2.18823695 | 0.45491600  | 1.05213296  | C                                                                                                          | -1.89545798 | -0.40691301 | 1.41529703  |
| C                                                               | -2.76353097 | 1.50070000  | 1.77725601  | C                                                                                                          | -2.60979605 | 0.29198501  | 2.39093304  |
| H                                                               | -2.12616897 | 2.17098904  | 2.34536195  | H                                                                                                          | -2.09631205 | 1.01983202  | 3.00975490  |
| C                                                               | -4.13998413 | 1.71330595  | 1.77008200  | C                                                                                                          | -3.97251797 | 0.07937300  | 2.56611705  |
| H                                                               | -4.56846094 | 2.53183508  | 2.33884096  | H                                                                                                          | -4.51888990 | 0.63403898  | 3.32054305  |
| C                                                               | -4.97228193 | 0.87880099  | 1.02408600  | C                                                                                                          | -4.63888407 | -0.85151601 | 1.76918697  |
| H                                                               | -6.04285192 | 1.04746699  | 1.00817597  | H                                                                                                          | -5.70137310 | -1.01824903 | 1.90096402  |
| C                                                               | -4.42514181 | -0.17676499 | 0.29970199  | C                                                                                                          | -3.94305801 | -1.56885195 | 0.79996598  |
| H                                                               | -5.07025099 | -0.82530397 | -0.27877101 | H                                                                                                          | -4.46527576 | -2.28288889 | 0.17710800  |
| C                                                               | -3.04649210 | -0.38062999 | 0.33803999  | C                                                                                                          | -2.57719803 | -1.34859002 | 0.64383799  |
| C                                                               | -2.30070901 | -1.50473201 | -0.39141899 | C                                                                                                          | -1.69966197 | -2.01956797 | -0.41432500 |
| C                                                               | -2.48236609 | -1.36517000 | -1.93974698 | C                                                                                                          | -2.30011010 | -1.78782403 | -1.84363306 |
| C                                                               | -2.83331609 | -2.90628505 | 0.04372400  | C                                                                                                          | -1.60009801 | -3.55813503 | -0.16614500 |
| C                                                               | -0.52861702 | -1.01101696 | 2.60287094  | C                                                                                                          | 0.03226100  | -1.08766305 | 2.24511194  |
| H                                                               | -1.32233703 | -1.74177694 | 2.50827098  | H                                                                                                          | -0.24404500 | -2.13129210 | 2.27350092  |
| H                                                               | -0.82376200 | -0.30307701 | 3.37592506  | H                                                                                                          | -0.16971000 | -0.58602500 | 3.18125391  |
| Cl                                                              | 0.82440501  | -2.00736189 | 3.44535398  | Cl                                                                                                         | 2.20883203  | -1.69732404 | 3.22843790  |
| C                                                               | 1.74049699  | -1.64665902 | -0.65516502 | C                                                                                                          | 2.30648494  | -1.62925506 | -0.30445200 |
| C                                                               | 2.61815596  | -0.66846901 | 1.21706200  | C                                                                                                          | 2.81387210  | 0.56006902  | 0.14938000  |

|   |             |             |             |   |             |             |             |
|---|-------------|-------------|-------------|---|-------------|-------------|-------------|
| C | 2.96510196  | -2.14482808 | -1.03080702 | C | 3.61300111  | -1.92047906 | -0.60352802 |
| H | 0.86485797  | -1.82198596 | -1.25995696 | H | 1.55079401  | -2.39562988 | -0.35538900 |
| C | 3.88464093  | -1.11682296 | 0.92477202  | C | 4.14438581  | 0.36172199  | -0.12090400 |
| H | 2.45541191  | -0.06785200 | 2.09787798  | H | 2.47295094  | 1.53412497  | 0.45818999  |
| C | 4.11019802  | -1.89161003 | -0.23695800 | C | 4.60745192  | -0.91516900 | -0.52088201 |
| H | 3.02470994  | -2.71811199 | -1.94327497 | H | 3.85385203  | -2.93337297 | -0.88742697 |
| H | 4.68653488  | -0.85786003 | 1.59897995  | H | 4.81349277  | 1.20181596  | -0.01789800 |
| N | 1.53700197  | -0.91692901 | 0.45913199  | N | 1.87313795  | -0.40160599 | 0.06044000  |
| N | 5.33937502  | -2.35582995 | -0.57055700 | N | 5.90777779  | -1.15814996 | -0.79799497 |
| C | 6.49158907  | -2.05070400 | 0.26953799  | C | 6.89657116  | -0.09071200 | -0.68319499 |
| H | 6.66610622  | -0.97243702 | 0.33219099  | H | 6.66427422  | 0.73870599  | -1.35657299 |
| H | 6.35821295  | -2.43933797 | 1.28305197  | H | 6.94921112  | 0.29428300  | 0.33904099  |
| H | 7.37663794  | -2.51392388 | -0.15721200 | H | 7.87405109  | -0.48135501 | -0.95057899 |
| C | 5.52651215  | -3.13251996 | -1.79064202 | C | 6.33997583  | -2.49605489 | -1.19027197 |
| H | 6.57207012  | -3.41477799 | -1.87603903 | H | 7.41063404  | -2.48448110 | -1.37240100 |
| H | 4.92722082  | -4.04718685 | -1.77579904 | H | 6.13399410  | -3.22695494 | -0.40340900 |
| H | 5.25460911  | -2.55406189 | -2.67848611 | H | 5.84076691  | -2.82036901 | -2.10717106 |
| O | -0.08446800 | 0.78635597  | -0.76256001 | O | -0.46463200 | 0.88559401  | -0.81630802 |
| C | 0.51966703  | 1.56005096  | 1.59458196  | C | 0.31110600  | 1.64221203  | 1.46996403  |
| C | 0.81796700  | 1.89469695  | 2.91989994  | C | 0.81304902  | 1.93961298  | 2.74142694  |
| C | 0.80149299  | 2.51837397  | 0.62196398  | C | -0.05250000 | 2.71328092  | 0.65717101  |
| C | 1.37146199  | 3.12904906  | 3.25317001  | C | 0.93009102  | 3.25658393  | 3.17783809  |
| H | 0.63102502  | 1.18192303  | 3.71508503  | H | 1.13988101  | 1.13757002  | 3.39328289  |
| C | 1.35869205  | 3.75858307  | 0.92931098  | C | 0.05264300  | 4.03920078  | 1.07362199  |
| C | 1.64371896  | 4.06408119  | 2.25647998  | C | 0.54575598  | 4.30776787  | 2.34599090  |
| H | 1.59521198  | 3.36262608  | 4.28850079  | H | 1.32512999  | 3.46809793  | 4.16539001  |
| H | 1.57170105  | 4.48016310  | 0.15197501  | H | -0.23777300 | 4.85300016  | 0.42313200  |
| H | 2.07710600  | 5.02448606  | 2.51029301  | H | 0.63629198  | 5.33313513  | 2.68469596  |
| C | 0.44346100  | 2.04534698  | -0.79096699 | C | -0.54040098 | 2.25316000  | -0.71824402 |
| C | -0.61379802 | 2.99375200  | -1.43680406 | C | -2.02060199 | 2.68505311  | -0.94846803 |
| C | 1.71883500  | 2.01985002  | -1.68894196 | C | 0.34565899  | 2.85122490  | -1.85030401 |
| F | 2.70154595  | 1.31927800  | -1.09596002 | F | 1.64257300  | 2.56133199  | -1.63297403 |

|                                                                   |             |             |             |                                                                                                              |             |             |             |
|-------------------------------------------------------------------|-------------|-------------|-------------|--------------------------------------------------------------------------------------------------------------|-------------|-------------|-------------|
| F                                                                 | 2.22322202  | 3.25171304  | -1.94728601 | F                                                                                                            | 0.25541601  | 4.19655800  | -1.94566500 |
| F                                                                 | 1.49027395  | 1.43812096  | -2.88397694 | F                                                                                                            | 0.03444000  | 2.35107899  | -3.06132197 |
| F                                                                 | -0.19532700 | 4.27776194  | -1.55791903 | F                                                                                                            | -2.19473004 | 4.02680492  | -0.88072503 |
| F                                                                 | -0.97257501 | 2.59116006  | -2.67349410 | F                                                                                                            | -2.49272203 | 2.29641390  | -2.14835596 |
| F                                                                 | -1.73098397 | 3.02276802  | -0.69169402 | F                                                                                                            | -2.81436610 | 2.14162588  | -0.01362600 |
| Si                                                                | -0.31277600 | -0.05432400 | 0.86746699  | Si                                                                                                           | -0.01074500 | -0.08784700 | 0.63993299  |
| <b>F</b><br>E(B3LYP-D3) = -3211.72472818<br>$N_{\text{imag}} = 0$ |             |             |             | <b>TS<sub>FG</sub></b><br>E(B3LYP-D3) = -3211.70507892<br>$N_{\text{imag}} = 1$ (- 362.57 cm <sup>-1</sup> ) |             |             |             |
| Si                                                                | -0.55892599 | 0.35692400  | -0.46548399 | Si                                                                                                           | 0.58620697  | 0.00677000  | 0.47071099  |
| F                                                                 | -3.92801905 | 0.72584701  | 1.04016495  | F                                                                                                            | 0.33209899  | 2.31428003  | -2.25129104 |
| F                                                                 | -5.01607895 | -1.15183604 | 1.03542197  | F                                                                                                            | -1.33989596 | 3.67236710  | -1.98527801 |
| F                                                                 | -4.96934605 | 0.08389000  | -0.74625701 | F                                                                                                            | -1.66991401 | 1.68465900  | -2.78579092 |
| F                                                                 | -3.96424603 | -3.22595811 | -0.36395901 | F                                                                                                            | -3.09633994 | 3.13450909  | 0.00960300  |
| F                                                                 | -3.91196203 | -2.00219893 | -2.15104604 | F                                                                                                            | -3.40906596 | 1.13425803  | -0.76491898 |
| F                                                                 | -2.08827305 | -2.90164804 | -1.40653706 | F                                                                                                            | -2.70813990 | 1.40840805  | 1.26617706  |
| F                                                                 | 2.55808711  | 1.84879303  | 2.23731089  | F                                                                                                            | 2.48173499  | -2.25154901 | -2.70134997 |
| F                                                                 | 1.85781097  | 3.88440490  | 1.97124398  | F                                                                                                            | 4.03288603  | -2.94888210 | -1.35518301 |
| F                                                                 | 0.45197901  | 2.30346894  | 2.45509791  | F                                                                                                            | 1.94101596  | -3.15835190 | -0.81108499 |
| F                                                                 | 2.28442788  | 2.39809608  | -1.92081201 | F                                                                                                            | 3.82321596  | 1.19002903  | -0.73733300 |
| F                                                                 | 3.61938906  | 1.93517995  | -0.27930701 | F                                                                                                            | 3.35807705  | 0.31265700  | -2.66047812 |
| F                                                                 | 2.87823296  | 3.95608211  | -0.53185701 | F                                                                                                            | 5.04960299  | -0.42038700 | -1.52697802 |
| O                                                                 | -2.24179912 | -0.15675101 | -0.98427403 | O                                                                                                            | -0.76737303 | 0.47845101  | -0.49242100 |
| O                                                                 | 1.09086502  | 0.93098700  | 0.11067100  | O                                                                                                            | 1.55977702  | -0.43615401 | -0.83978701 |
| C                                                                 | -0.82501900 | -0.75419801 | 1.04223502  | C                                                                                                            | 0.72843599  | 1.74496901  | 1.14644301  |
| C                                                                 | 0.05589000  | -1.00489104 | 2.09694290  | C                                                                                                            | 1.61898303  | 2.31170702  | 2.05926609  |
| H                                                                 | 1.01208496  | -0.49934700 | 2.12101293  | H                                                                                                            | 2.37274694  | 1.69757104  | 2.53464103  |
| C                                                                 | -0.28832400 | -1.89622700 | 3.10811305  | C                                                                                                            | 1.54595006  | 3.66772699  | 2.36014891  |
| H                                                                 | 0.40194201  | -2.08821011 | 3.92149806  | H                                                                                                            | 2.23898506  | 4.10234880  | 3.07052398  |
| C                                                                 | -1.52207804 | -2.54537201 | 3.07857895  | C                                                                                                            | 0.58588099  | 4.47127819  | 1.74744403  |
| H                                                                 | -1.79004395 | -3.23872304 | 3.86691499  | H                                                                                                            | 0.53261298  | 5.52720594  | 1.98309398  |

|   |             |             |             |   |             |             |             |
|---|-------------|-------------|-------------|---|-------------|-------------|-------------|
| C | -2.41529608 | -2.30570889 | 2.03890300  | C | -0.30652201 | 3.92626691  | 0.82983601  |
| H | -3.37257195 | -2.80806303 | 2.02063489  | H | -1.04760504 | 4.55464792  | 0.35598901  |
| C | -2.05296397 | -1.41430700 | 1.03214002  | C | -0.22430700 | 2.56785297  | 0.53952301  |
| C | -2.91261792 | -1.04070401 | -0.17885900 | C | -1.12276804 | 1.81733894  | -0.44706500 |
| C | -4.22571278 | -0.35028401 | 0.28891900  | C | -0.95943499 | 2.38381410  | -1.88382804 |
| C | -3.23900604 | -2.30187201 | -1.02635002 | C | -2.60514498 | 1.87830198  | 0.01154300  |
| C | -0.97512400 | 2.19511294  | -0.65148699 | C | 2.17515492  | -0.90613103 | 1.68811500  |
| C | -2.16640806 | 2.76862597  | -1.10428500 | C | 2.46987510  | -0.94643801 | 3.05160093  |
| H | -2.98379588 | 2.12628508  | -1.40348804 | H | 1.68594694  | -0.77008998 | 3.78045893  |
| C | -2.30797791 | 4.15179777  | -1.16348803 | C | 3.75931811  | -1.21391499 | 3.49935889  |
| H | -3.23460388 | 4.58758116  | -1.51904297 | H | 3.97160006  | -1.23977804 | 4.56176376  |
| C | -1.26202404 | 4.98115396  | -0.76085502 | C | 4.77544117  | -1.45774996 | 2.57843804  |
| H | -1.37506294 | 6.05797100  | -0.80223799 | H | 5.77984715  | -1.67644298 | 2.91956401  |
| C | -0.07086600 | 4.42989111  | -0.29955801 | C | 4.50694084  | -1.41052103 | 1.21533597  |
| H | 0.73705298  | 5.07378912  | 0.01941100  | H | 5.30556488  | -1.58200300 | 0.50743699  |
| C | 0.05687700  | 3.04418206  | -0.25500101 | C | 3.21202707  | -1.12860596 | 0.77993798  |
| C | 1.28984499  | 2.28158307  | 0.23296700  | C | 2.83659506  | -0.96613598 | -0.69252998 |
| C | 1.55230904  | 2.59042311  | 1.73481905  | C | 2.83259106  | -2.34467292 | -1.40796900 |
| C | 2.53396702  | 2.65524912  | -0.61889899 | C | 3.78567791  | 0.03158700  | -1.41950500 |
| C | 0.26188299  | -0.56953698 | -1.95499599 | C | 0.13914800  | -1.46646297 | 1.41408801  |
| H | 0.59506398  | 0.15155999  | -2.70048904 | H | -0.06306300 | -1.41154397 | 2.47287989  |
| H | -0.44903401 | -1.24057305 | -2.43059492 | H | 0.42541400  | -2.43939805 | 1.04408896  |
| C | 1.25959098  | -2.55962801 | -0.92624801 | C | -2.87773108 | -1.64144194 | 1.93544900  |
| C | 2.69228005  | -0.89087802 | -1.68928301 | C | -2.26767802 | -2.44260502 | -0.11757300 |
| C | 2.30470800  | -3.29262209 | -0.44401601 | C | -4.21839905 | -1.68920803 | 1.62001097  |
| H | 0.23920099  | -2.89636707 | -0.82531101 | H | -2.56206799 | -1.27802098 | 2.90778303  |
| C | 3.78646588  | -1.56672001 | -1.22968304 | C | -3.57689404 | -2.52990699 | -0.53690302 |
| H | 2.78463697  | 0.06238200  | -2.18390298 | H | -1.46173298 | -2.72031498 | -0.78857797 |
| C | 3.63803911  | -2.81569099 | -0.56956398 | C | -4.62108803 | -2.13905501 | 0.33855200  |
| H | 2.08016706  | -4.23206615 | 0.03499600  | H | -4.93585014 | -1.36588097 | 2.35885692  |
| H | 4.75424290  | -1.11689401 | -1.38241994 | H | -3.77831602 | -2.88397694 | -1.53652000 |
| N | 1.43580401  | -1.36948597 | -1.54963195 | N | -1.90490305 | -2.01340389 | 1.09674501  |

|                                                                                                                                                                          |             |             |             |                                                                                                                                                                             |             |             |             |
|--------------------------------------------------------------------------------------------------------------------------------------------------------------------------|-------------|-------------|-------------|-----------------------------------------------------------------------------------------------------------------------------------------------------------------------------|-------------|-------------|-------------|
| N                                                                                                                                                                        | 4.69065189  | -3.50395107 | -0.09450900 | N                                                                                                                                                                           | -5.92573690 | -2.18572497 | -0.03100000 |
| C                                                                                                                                                                        | 6.04665422  | -2.97771311 | -0.24495600 | C                                                                                                                                                                           | -6.29591799 | -2.64014912 | -1.36609101 |
| H                                                                                                                                                                        | 6.15815115  | -2.02225089 | 0.27373099  | H                                                                                                                                                                           | -5.88037682 | -1.98917305 | -2.14139390 |
| H                                                                                                                                                                        | 6.74977589  | -3.68449998 | 0.18451101  | H                                                                                                                                                                           | -5.94873810 | -3.66093493 | -1.54787302 |
| H                                                                                                                                                                        | 6.29950285  | -2.83968306 | -1.29883802 | H                                                                                                                                                                           | -7.37831402 | -2.63079596 | -1.45771801 |
| C                                                                                                                                                                        | 4.49206877  | -4.78103924 | 0.58982098  | C                                                                                                                                                                           | -6.96463680 | -1.72717404 | 0.88340902  |
| H                                                                                                                                                                        | 4.03303289  | -5.51667118 | -0.07511300 | H                                                                                                                                                                           | -6.82291317 | -0.67653000 | 1.15382802  |
| H                                                                                                                                                                        | 5.45606899  | -5.16420603 | 0.90963697  | H                                                                                                                                                                           | -7.93272495 | -1.82587504 | 0.40056399  |
| H                                                                                                                                                                        | 3.86045790  | -4.65963602 | 1.47302997  | H                                                                                                                                                                           | -6.97911882 | -2.32226396 | 1.80104101  |
| <p style="text-align: center;">G</p> <p style="text-align: center;">E(B3LYP-D3) = -2751.38585347</p> <p style="text-align: center;"><math>N_{\text{imag}} = 0</math></p> |             |             |             | <p style="text-align: center;">DMAP</p> <p style="text-align: center;">E(B3LYP-D3) = -382.391238753</p> <p style="text-align: center;"><math>N_{\text{imag}} = 0</math></p> |             |             |             |
| F                                                                                                                                                                        | -2.53487897 | 1.67243302  | 2.50695109  | N                                                                                                                                                                           | 2.66828704  | 0.00000000  | 0.00011300  |
| F                                                                                                                                                                        | -4.50376177 | 1.28760302  | 1.71836603  | C                                                                                                                                                                           | 1.95030999  | -1.13352501 | 0.00005700  |
| F                                                                                                                                                                        | -3.18167806 | -0.36710000 | 2.18209696  | C                                                                                                                                                                           | 1.95030999  | 1.13352501  | 0.00004200  |
| F                                                                                                                                                                        | -2.40117002 | 2.33930993  | -1.66868305 | H                                                                                                                                                                           | 2.51832795  | 2.05939507  | 0.00012500  |
| F                                                                                                                                                                        | -2.58853102 | 3.31040692  | 0.25994399  | C                                                                                                                                                                           | 0.56881601  | -1.19673204 | -0.00008800 |
| F                                                                                                                                                                        | -4.31310797 | 2.36834908  | -0.66106802 | H                                                                                                                                                                           | 0.09239200  | -2.16586995 | -0.00007900 |
| O                                                                                                                                                                        | -1.22504997 | 0.91387600  | 0.42065799  | C                                                                                                                                                                           | 0.56881601  | 1.19673204  | -0.00010500 |
| C                                                                                                                                                                        | -2.28837991 | -0.85995901 | -1.58365202 | N                                                                                                                                                                           | -1.54713905 | 0.00000000  | -0.00051700 |
| C                                                                                                                                                                        | -2.78701401 | -1.93515801 | -2.32846808 | C                                                                                                                                                                           | -2.27978492 | -1.25865901 | 0.00018600  |
| H                                                                                                                                                                        | -2.13272095 | -2.41416311 | -3.04721904 | H                                                                                                                                                                           | -2.05037999 | -1.85628998 | 0.88786697  |
| C                                                                                                                                                                        | -4.08798981 | -2.39005399 | -2.17405891 | H                                                                                                                                                                           | -3.34634995 | -1.05113006 | -0.00044400 |
| H                                                                                                                                                                        | -4.44519615 | -3.22305608 | -2.76782489 | H                                                                                                                                                                           | -2.04965091 | -1.85757399 | -0.88641500 |
| C                                                                                                                                                                        | -4.92872477 | -1.76508296 | -1.25941098 | C                                                                                                                                                                           | -2.27978611 | 1.25865805  | 0.00021600  |
| H                                                                                                                                                                        | -5.95179081 | -2.09705591 | -1.13313901 | H                                                                                                                                                                           | -3.34635091 | 1.05113006  | -0.00033800 |
| C                                                                                                                                                                        | -4.44765806 | -0.70943999 | -0.49774900 | H                                                                                                                                                                           | -2.05032301 | 1.85629904  | 0.88787597  |
| H                                                                                                                                                                        | -5.11767721 | -0.23986700 | 0.20644499  | H                                                                                                                                                                           | -2.04971004 | 1.85756505  | -0.88640702 |
| C                                                                                                                                                                        | -3.13037801 | -0.25991800 | -0.63389403 | C                                                                                                                                                                           | -0.18576799 | 0.00000000  | -0.00023800 |
| C                                                                                                                                                                        | -2.58984590 | 0.89379102  | 0.22583200  | H                                                                                                                                                                           | 0.09239200  | 2.16586995  | -0.00011400 |
| C                                                                                                                                                                        | -3.21805406 | 0.87547803  | 1.66836596  | H                                                                                                                                                                           | 2.51832795  | -2.05939507 | 0.00015500  |

|   |             |             |             |
|---|-------------|-------------|-------------|
| C | -2.98972297 | 2.24388003  | -0.45656899 |
| C | -0.87974501 | -0.39520600 | -1.83384001 |
| C | 0.77175802  | 2.57787395  | -0.87409300 |
| C | 2.38015389  | 1.42773402  | 0.33192399  |
| C | 1.53888404  | 3.70784497  | -0.90448600 |
| H | -0.20013399 | 2.56703591  | -1.33753800 |
| C | 3.20104909  | 2.51843095  | 0.36497101  |
| C | 2.81303096  | 3.72736001  | -0.27430901 |
| H | 1.14494705  | 4.57385588  | -1.41232598 |
| H | 4.14275122  | 2.42771506  | 0.88264900  |
| N | 1.16987205  | 1.42844796  | -0.27768299 |
| N | 3.59829998  | 4.81703520  | -0.28107399 |
| C | 4.89854908  | 4.79635096  | 0.38862801  |
| H | 4.78752804  | 4.59108877  | 1.45582902  |
| H | 5.55472183  | 4.04125977  | -0.05068400 |
| H | 5.37020302  | 5.76749182  | 0.27533501  |
| C | 3.16568089  | 6.03784323  | -0.96076000 |
| H | 3.94475007  | 6.78833580  | -0.86980498 |
| H | 2.98882198  | 5.85290813  | -2.02277207 |
| H | 2.25115895  | 6.43470287  | -0.51344103 |
| O | 1.53627503  | -1.06311500 | -0.90797299 |
| C | 0.36614600  | -1.11953700 | 1.32447600  |
| C | -0.18928599 | -0.91358501 | 2.58835411  |
| C | 1.26277101  | -2.17750812 | 1.16288400  |
| C | 0.12665799  | -1.75949502 | 3.64708400  |
| H | -0.85672498 | -0.08196600 | 2.75094509  |
| C | 1.56650805  | -3.05000806 | 2.20221591  |
| C | 0.99088597  | -2.83462501 | 3.45063090  |
| H | -0.30142999 | -1.58314204 | 4.62687922  |
| H | 2.24833488  | -3.87612796 | 2.05472302  |
| H | 1.22738898  | -3.49954391 | 4.27262402  |
| C | 1.85764098  | -2.22252297 | -0.24387400 |

|    |             |             |             |
|----|-------------|-------------|-------------|
| C  | 3.40775108  | -2.33476806 | -0.20877200 |
| C  | 1.26012397  | -3.43163610 | -1.02676797 |
| F  | -0.07981600 | -3.30671406 | -1.09225702 |
| F  | 1.51833403  | -4.62031794 | -0.44517699 |
| F  | 1.71322703  | -3.49849200 | -2.29237390 |
| F  | 3.84624100  | -3.51570511 | 0.27493700  |
| F  | 3.94871402  | -2.18133998 | -1.42886198 |
| Si | 0.10534700  | -0.10553300 | -0.24852900 |
| H  | -0.90334702 | 0.56852901  | -2.35298800 |
| H  | -0.36754200 | -1.09463406 | -2.48811889 |
| H  | 2.67267203  | 0.50537997  | 0.80492002  |
| F  | 3.92939305  | -1.37112606 | 0.57799000  |



## V. Experimental references

- [1] Frisch, M.J.; Trucks, G.W.; Schlegel, H.B.; Scuseria, G.E.; Robb, M.A.; Cheeseman, J.R.; Scalmani, G.; Barone, V.; Mennucci, B.; Petersson, G.A.; et al. *Gaussian 09, Revision D.01*; Gaussian, Inc.: Wallingford, CT, USA, 2009.
